# Supplementary material for: Housing, neighbourhood and sociodemographic associations with adult levels of physical activity and adiposity: baseline findings from the ENABLE London study
Source: PubMed Central journal article supplement (PMC6104748; doi:10.1136/bmjopen-2017-021257), 2018-08-17
Supplement: bmjopen-2017-021257.draft_revisions.pdf [file bmjopen-2017-021257.draft_revisions.pdf]

# BMJ Open

BMJ Open is committed to open peer review. As part of this commitment we make the peer review history of every article we publish publicly available.

When an article is published we post the peer reviewers' comments and the authors' responses online. We also post the versions of the paper that were used during peer review. These are the versions that the peer review comments apply to.

The versions of the paper that follow are the versions that were submitted during the peer review process. They are not the versions of record or the final published versions. They should not be cited or distributed as the published version of this manuscript.

BMJ Open is an open access journal and the full, final, typeset and author-corrected version of record of the manuscript is available on our site with no access controls, subscription charges or pay-per-view fees (<http://bmjopen.bmj.com>).

If you have any questions on BMJ Open's open peer review process please email [info.bmjopen@bmj.com](mailto:info.bmjopen@bmj.com)

# BMJ Open

## Housing, neighbourhood and sociodemographic associations with adult levels of physical activity and adiposity: baseline findings from the ENABLE London Study

|                               |                                                                                                                                                                                                                                                                                                                                                                                                                                                                                                                                                                                                                                                                                                                                                                                                                                                                                                                                                                                                                                                                                                                                                                                                                                                                                                              |
|-------------------------------|--------------------------------------------------------------------------------------------------------------------------------------------------------------------------------------------------------------------------------------------------------------------------------------------------------------------------------------------------------------------------------------------------------------------------------------------------------------------------------------------------------------------------------------------------------------------------------------------------------------------------------------------------------------------------------------------------------------------------------------------------------------------------------------------------------------------------------------------------------------------------------------------------------------------------------------------------------------------------------------------------------------------------------------------------------------------------------------------------------------------------------------------------------------------------------------------------------------------------------------------------------------------------------------------------------------|
| Journal:                      | <i>BMJ Open</i>                                                                                                                                                                                                                                                                                                                                                                                                                                                                                                                                                                                                                                                                                                                                                                                                                                                                                                                                                                                                                                                                                                                                                                                                                                                                                              |
| Manuscript ID                 | bmjopen-2017-021257                                                                                                                                                                                                                                                                                                                                                                                                                                                                                                                                                                                                                                                                                                                                                                                                                                                                                                                                                                                                                                                                                                                                                                                                                                                                                          |
| Article Type:                 | Research                                                                                                                                                                                                                                                                                                                                                                                                                                                                                                                                                                                                                                                                                                                                                                                                                                                                                                                                                                                                                                                                                                                                                                                                                                                                                                     |
| Date Submitted by the Author: | 19-Dec-2017                                                                                                                                                                                                                                                                                                                                                                                                                                                                                                                                                                                                                                                                                                                                                                                                                                                                                                                                                                                                                                                                                                                                                                                                                                                                                                  |
| Complete List of Authors:     | Nightingale, C; St George's University London, Division of Population Health Sciences and Education<br>Rudnicka, Alicja; SGUL University of London<br>Ram, Bina; St George's, University of London, Population Health Research Institute<br>Shankar, Aparna; St. George's, University of London, Population Health Research Institute<br>Procter, Duncan; University of Bristol, Centre for Exercise, Nutrition and Health Sciences<br>Cooper, Ashley; University of Bristol,<br>Page, Angie; University of Bristol, Centre for Exercise, Nutrition and Health Sciences<br>Ellaway, Anne; University of Glasgow, MRC/SCO Social and Public Health Sciences Unit<br>Giles-Corti, Billie; RMIT University, NHMRC Centre of Research Excellence in Healthy Liveable Communities<br>Clary, Christelle; London School of Hygiene and Tropical Medicine, Social And Environmental Health Research<br>Lewis, Daniel; London School of Hygiene and Tropical Medicine,<br>Cummins, Steven; London School of Hygiene and Tropical Medicine, Department of Social and Environmental Health Research<br>Whincup, Peter; St Georges, University of London<br>Cook, Derek; St George's University, Division of Population Health Sciences<br>Owen, C; St George's, University London, Population Health Research Institute |
| Keywords:                     | Physical activity, Adiposity, Housing, Perceived neighbourhood environment, ENABLE-London                                                                                                                                                                                                                                                                                                                                                                                                                                                                                                                                                                                                                                                                                                                                                                                                                                                                                                                                                                                                                                                                                                                                                                                                                    |
|                               |                                                                                                                                                                                                                                                                                                                                                                                                                                                                                                                                                                                                                                                                                                                                                                                                                                                                                                                                                                                                                                                                                                                                                                                                                                                                                                              |

SCHOLARONE™  
Manuscripts

1  
2  
3 **Housing, neighbourhood and sociodemographic associations with adult levels**  
4 **of physical activity and adiposity: baseline findings from the ENABLE London**  
5 **Study**  
6  
7

8 CM Nightingale<sup>1</sup>, AR Rudnicka<sup>1</sup>, B Ram<sup>1</sup>, A Shankar<sup>1</sup>, D Procter<sup>2,3</sup>, AR Cooper<sup>2,3</sup>, AS Page<sup>2,3</sup>,  
9 A Ellaway<sup>4</sup>, B Giles-Corti<sup>5</sup>, C Clary<sup>6</sup>, D Lewis<sup>6</sup>, S Cummins<sup>6</sup>, PH Whincup<sup>1</sup>, DG Cook<sup>1</sup>, CG  
10 Owen<sup>1</sup>  
11  
12  
13  
14

15  
16 <sup>1</sup> Population Health Research Institute, St George's, University of London, London, UK.

17 <sup>2</sup> Centre for Exercise, Nutrition and Health Sciences, University of Bristol, Bristol, UK.

18 <sup>3</sup> National Institute for Health Research Bristol Biomedical Research Centre (Nutrition  
19 Theme)  
20

21 <sup>4</sup> MRC/SCO Social and Public Health Sciences Unit, University of Glasgow, Glasgow, UK.

22 <sup>5</sup> NHMRC Centre of Research Excellence in Healthy Liveable Communities, RMIT University,  
23 Melbourne, Australia.  
24

25 <sup>6</sup> London School of Hygiene and Tropical Medicine, London, UK.  
26  
27  
28  
29  
30

31 Corresponding Author:-

32 Dr Claire M Nightingale

33 Population Health Research Institute, St. George's, University of London, Cranmer Terrace,  
34 London SW17 0RE. Email: [cnightin@sgul.ac.uk](mailto:cnightin@sgul.ac.uk) Phone: +44 (0) 208 725 2342  
35  
36  
37  
38

39 **Total word count:** 3996 excluding abstract (300 words)

40 **Tables and figures:** 3 tables, 1 figure, 5 supplementary tables

41 **References:** 48  
42  
43  
44  
45  
46  
47  
48  
49  
50  
51  
52  
53  
54  
55  
56  
57  
58  
59  
60

## **Abstract**

**Objectives:** The neighbourhood environment is increasingly shown to be an important correlate of health. We assessed associations between housing tenure, neighbourhood perceptions, sociodemographic factors, and levels of physical activity (PA) and adiposity among adults seeking housing in East Village (formerly London 2012 Olympic/Paralympic Games Athletes' Village).

**Setting:** Cross-sectional analysis of adults seeking social, intermediate and market-rent housing in East Village.

**Participants:** 1278 participants took part in the study (58% female). Complete data on adiposity (body mass index [BMI] and fat mass %) were available for 1240 participants (97%); of these a subset of 1107 participants (89%) met the inclusion criteria for analyses of accelerometer-based measurements of PA. We examined associations between housing sector sought, neighbourhood perceptions (covariates) and PA and adiposity (dependent variables) adjusted for household clustering, sex, age group, ethnic group, and limiting longstanding illness.

**Results:** Participants seeking social housing had the fewest steps (8304, 95%CI 7959,8648) and highest BMI (26.0kg/m<sup>2</sup> 95%CI 25.5,26.5kg/m<sup>2</sup>) compared with those seeking intermediate (steps 9417, 95%CI 9106,9731; BMI 24.8kg/m<sup>2</sup> 95%CI 24.4,25.2kg/m<sup>2</sup>) or market-rent housing (steps 9313, 95%CI 8858,9768; BMI 24.6kg/m<sup>2</sup> 95%CI 24.0,25.2kg/m<sup>2</sup>). Those seeking social housing had lower levels of PA (by 19-42%) at weekends vs weekdays, compared with other housing groups. Positive perceptions of neighbourhood quality were associated with higher steps and lower BMI, with differences between social and

intermediate groups reduced by ~10% following adjustment, equivalent to a reduction of 111 for steps and 0.5kg/m<sup>2</sup> for BMI.

**Conclusions:** The social housing group undertook less PA than other housing sectors, with weekend PA offering the greatest scope for increasing PA, and tackling adiposity in this group. Perceptions of neighbourhood quality were associated with PA and adiposity and reduced differences in steps and BMI between housing sectors. Moving to East Village may provide scope to encourage PA and reduce adiposity amongst the most disadvantaged.

### Strengths and limitations of this study

- Large sample with representation of three different aspirational housing groups, providing a wide range of socioeconomic backgrounds
- Objective measurements of physical activity and adiposity outcomes using accelerometry and bioelectrical impedance respectively
- Lower number of participants studied seeking market-rent housing compared with those seeking intermediate or social housing

### Keywords

Physical activity; Adiposity; Housing; Perceived neighbourhood environment; ENABLE-London

## ***Introduction***

Physical inactivity and adiposity are associated with an increased risk of type 2 diabetes and cardiovascular disease (1-4) and constitute a serious public health problem in the UK and globally (5). Evidence suggests that levels of physical activity (PA) are lower among those who are socioeconomically disadvantaged (6), who experience greater economic, access and health related barriers to being physically active (7). Socioeconomic status is also associated with differences in types of PA, in particular higher socioeconomic status is associated with more vigorous leisure time PA (8). Previous research has found variation in PA by day of the week with studies showing lower levels of activity on Sundays compared with weekdays in young adults (9), parents and their children (10).

There is emerging evidence suggesting that housing tenure is an important determinant of health. In particular, UK-based studies have shown that housing tenure (owner vs. private renter vs. public sector renter) is associated with illness and mortality (15;16). Amongst particular groups including those who are economically inactive or unemployed, housing tenure might provide a better indication of socioeconomic status compared with measures based on occupation or income (11). Indeed, in several studies housing tenure remained associated with health outcomes following adjustment for conventional measures of socioeconomic status such as income or education (12;13). A more nuanced approach is therefore required with respect to measures of socioeconomic status, and they should not be simply regarded as interchangeable (14;15). Despite this, there has been limited research examining the direct effect of housing tenure on PA, and existing evidence is equivocal.

Harrison and colleagues found no association between housing tenure and meeting recommended levels of PA among community dwelling healthy adults in the North-East of

1  
2  
3 England (16). Similarly housing tenure was not associated with self-reported energetic PA  
4  
5 among older Australians (17). Ogilvie and colleagues found overall levels of PA to be higher  
6  
7 among individuals living in social rented accommodation compared with owner-occupiers  
8  
9 (18). The authors suggest that may capture occupational PA levels which are likely to be  
10  
11 higher among social renters (18). In contrast, living in private rental accommodation was  
12  
13 associated with a greater likelihood of taking up exercise over a 9-year period among men  
14  
15 aged 18-49 at baseline, compared with those in local authority accommodation (19).  
16  
17  
18  
19  
20

21 Housing tenure may affect health and health behaviours in part through characteristics of  
22  
23 the home or neighbourhood itself (20;21) or psychological factors such as self-efficacy or  
24  
25 self-esteem (22). Social housing estates which are common in the UK may be associated  
26  
27 with specific cultures and norms, which in turn shape residents' behaviours (13). Subjective  
28  
29 characteristics of the neighbourhood environment including higher perceived access to  
30  
31 recreational facilities and shops in local proximity have been shown to be associated with  
32  
33 higher levels of PA (23;24). Residents who perceive their neighbourhood more positively,  
34  
35 have been shown to have better mental health and are less likely to relocate (25).  
36  
37  
38

39 Conversely, real and perceived crime, has the potential to constrain resident's PA (26).  
40

41 However, a recent systematic review suggested a lack of association between PA and  
42  
43 perceptions of safety from crime; highlighting the need for high quality evidence, including  
44  
45 prospective studies and natural experiments (27), to examine this issue further. In  
46  
47 particular, high quality evidence is needed to understand the potentially multifactorial  
48  
49 influence of residential location on health and health behaviours; effects which are likely to  
50  
51 extend beyond simple measures of socioeconomic status (27).  
52  
53  
54  
55  
56  
57  
58  
59  
60

1  
2  
3 The Examining Neighbourhood Activities and Built Living Environments in London (ENABLE  
4  
5 London) study is a longitudinal study evaluating how active urban design influences the  
6  
7 health and wellbeing of people moving in to the former Athletes' Village of the London 2012  
8  
9 Olympic and Paralympic Games now known as 'East Village' (28). East Village is a new high-  
10  
11 density neighbourhood development built on active design principles containing a mix of  
12  
13 social housing, intermediate (including affordable rent, shared ownership and shared  
14  
15 equity) housing, and market-rent housing. This paper draws on baseline data (prior to any  
16  
17 potential move to East Village) to first, examine predictors of PA and adiposity (measured  
18  
19 objectively using accelerometry and bioelectrical impedance), including the housing sector  
20  
21 to which they are applying and perceptions of their neighbourhood. Second, to examine  
22  
23 whether PA patterns across the week vary by housing sector and third, to examine whether  
24  
25 adjustment for perceptions of the neighbourhood environment reduce housing sector  
26  
27 differences in PA and adiposity.  
28  
29  
30  
31  
32  
33  
34

### 35 **Methods**

36  
37 Study participants were recruited from those seeking new accommodation in East Village  
38  
39 and were classified by the type of housing tenure sought; social, intermediate or market-  
40  
41 rent. Current housing status was strongly linked to aspirational housing status, where those  
42  
43 seeking social accommodation were currently in social housing or on social housing waiting  
44  
45 lists, and those seeking intermediate and market-rent accommodation were largely in  
46  
47 privately rented housing. Recruitment of participants in the different housing sectors was  
48  
49 carried out between January 2013 and December 2015 in three phases determined by the  
50  
51 order of availability of housing in East Village (social, intermediate, and market-rent  
52  
53 respectively). Social housing is provided by the local authority or housing association at  
54  
55  
56  
57  
58  
59  
60



1  
2  
3 subsidised rates. Baseline assessments of participants were carried out in their place of  
4  
5 residence before any potential move to East Village. Full details of the recruitment process  
6  
7 can be found elsewhere (28).  
8  
9

### 10 11 12 **Independent variables** 13

14 A team of trained fieldworkers administered self-complete questionnaires on a laptop  
15  
16 during home visits. Data on age, sex, self-defined ethnicity, work status, occupation and  
17  
18 whether the participant had a limiting longstanding illness or disability (lasting or expected  
19  
20 to last at least 12 months) were collected. Participants self-defined as 'White', 'Asian',  
21  
22 'Black', 'Mixed', or 'Other'; the latter two categories were combined for analyses.  
23  
24 Socioeconomic status based on occupation was coded using the National Statistics Social-  
25  
26 Economic Coding (NS-SEC) to categorise participants into 'higher managerial or professional  
27  
28 occupations', 'intermediate occupations', 'routine or manual' (28). An additional  
29  
30 'economically inactive' category included those seeking employment, unable to work due to  
31  
32 disability or illness, retired, looking after home and family, and students. We sought  
33  
34 information on educational attainment; participants were categorised into "Degree or  
35  
36 equivalent / Higher", "Intermediate qualifications" (including A levels and GCSEs), and  
37  
38 "Other / None" (including work-based or foreign qualifications). Participants completed  
39  
40 questionnaires assessing neighbourhood perceptions. Five items assessed perceived crime  
41  
42 (e.g. "There is a lot of crime in my neighbourhood"; Cronbach's  $\alpha = 0.87$ ) and six items  
43  
44 assessed neighbourhood quality (e.g. "This area is a place I enjoy living in"; Cronbach's  $\alpha$   
45  
46 =0.78). Responses on items were summed and scores ranged from -10 to +10 for perceived  
47  
48 crime and -12 to +12 for perceived quality, such that positive scores indicate less perceived  
49  
50 crime and better neighbourhood quality while negative scores indicate more perceived  
51  
52  
53  
54  
55  
56  
57  
58  
59  
60

1  
2  
3 crime and poorer quality. The scales were derived following an exploratory factor analysis of  
4  
5 14 questions regarding neighbourhood (Supplementary Table 1).  
6  
7

### 8 9 **Dependent variables**

10  
11 Height was measured to the last complete millimetre using a portable stadiometer; weight  
12  
13 was measured to the nearest kilogram using a Tanita SC-240 Body Composition Analyzer  
14  
15 (Tanita, Tokyo, Japan); body mass index (BMI) was derived as  $\text{weight}(\text{kg})/\text{height}(\text{m})^2$ . The  
16  
17 Tanita SC-240 Body Composition Analyzer also measured leg-to-leg bioelectrical impedance  
18  
19 from which fat free mass and fat mass were estimated. Fat mass percentage was calculated  
20  
21 as  $\text{fat mass}(\text{kg})/\text{weight}(\text{kg}) * 100$ .  
22  
23  
24  
25

26  
27  
28 Participants wore a hip-mounted ActiGraph GT3X+ accelerometer during waking hours over  
29  
30 a consecutive period of 7 days (ActiGraph LLC, Florida, USA). These accelerometers  
31  
32 provided daily measures of steps, counts and time spent in moderate and vigorous PA  
33  
34 (MVPA) using established cut-offs. Daily time spent in MVPA both overall and in 10 minute  
35  
36 bouts in accordance with UK recommendations for PA (30) were assessed. The cut-point for  
37  
38 moderate PA was defined as 5724 counts per minute (31). We excluded any days of  
39  
40 recording where the amount of registered time accumulated was below 540 minutes (32).  
41  
42  
43

44 Non-wear periods were defined as a minimum length of 60 minutes, allowing for a 2-minute  
45  
46 spike tolerance. Participants with at least one day of recording were retained in analyses.  
47

48 We fitted a multilevel linear model for each outcome to allow for repeated measurements  
49  
50 of daily PA, by fitting participant as a random effect and adjusting for day of the week, day  
51  
52 order of recording and month as fixed effects. Raw level one residuals were obtained from  
53  
54 the model and a within person average value of each outcome variable was obtained by  
55  
56  
57

1  
2  
3 averaging these raw residuals. The average of these raw residuals for each participant was  
4  
5 added to the sample mean for that particular PA variable to derive an unbiased average  
6  
7 level of each PA variable for each person.  
8  
9

### 10 11 12 **Statistical analysis**

13  
14 All analyses were carried out using STATA/SE software (Stata/SE 14 for Windows; StataCorp  
15  
16 LP, College Station, TX, USA). Outcome variables were inspected for normality and BMI was  
17  
18 log transformed due to its skewed distribution. Multilevel linear regression models were  
19  
20 fitted, mutually adjusted for housing sector and participant characteristics (sex, age group,  
21  
22 ethnic group, and limiting longstanding illness) as fixed effects and a random effect to allow  
23  
24 for household clustering. Absolute differences or percentage differences for are presented  
25  
26 by sex, age group, ethnic group, limiting longstanding illness and housing sector. Sensitivity  
27  
28 analyses examined whether associations remained when the sample was restricted to 931  
29  
30 participants (84%) with at least four days of 540 or more minutes per day of recording.  
31  
32  
33  
34  
35  
36

37 To assess differences in PA by day of the week as opposed to overall levels of PA we took  
38  
39 the following approach. Daily PA data were examined using multilevel models with random  
40  
41 effects to allow for multiple days of recording within person and household clustering. An  
42  
43 interaction between housing sector and day of the week was fitted and models were  
44  
45 adjusted for sex, age group, ethnic group, limiting longstanding illness, day order of  
46  
47 recording and month of measurement as fixed effects.  
48  
49  
50

51  
52  
53 Associations between perceptions of neighbourhood crime and quality with adiposity/PA  
54  
55 outcomes were assessed. The effect of adjustment for neighbourhood perceptions in  
56  
57  
58

1  
2  
3 addition to adjustment for participant characteristics using multilevel models as described  
4  
5 above on differences in outcomes between housing sector groups was also examined.  
6  
7  
8

## 9 **Results**

10  
11 Of 1819 households who consented to initial contact by the study team, 1278 participants  
12  
13 from 1006 households (55%) were enrolled in the study and completed a questionnaire.  
14  
15 Participation rates for those seeking market-rent and intermediate housing were 58% and  
16  
17 57% respectively and were slightly lower in the social group (52%). Complete data on  
18  
19 adiposity were available for 1240 participants (97%); of these a sub-set of 1107 participants  
20  
21 (89%) met the inclusion criteria for analyses of objectively measured PA. Participant  
22  
23 characteristics (age, sex) and levels of adiposity were similar among those who did and did  
24  
25 not provide PA data; however, participants from black and Asian ethnic groups were less  
26  
27 likely to provide PA data. Supplementary Table 2 shows participants characteristics at  
28  
29 baseline for the 1240 adults with measurements of adiposity at baseline. Those seeking  
30  
31 social housing were more likely to be female, of older age, of non-white ethnicity, to have  
32  
33 limiting longstanding illness, and be in routine / manual occupations or economically  
34  
35 inactive compared to those seeking intermediate or market-rent housing.  
36  
37  
38  
39  
40  
41  
42  
43

44 Adjusted mean levels of adiposity and PA outcomes by housing sector and participant  
45  
46 characteristics are shown in Supplementary Table 3. Table 1 shows housing sector and  
47  
48 other participant characteristics associations with adiposity markers (BMI, fat mass %) and  
49  
50 objectively measured PA (steps, time spent in MVPA, time spent in MVPA in 10 minute  
51  
52 bouts). Participants seeking social housing had markedly higher levels of BMI and fat mass  
53  
54 % and markedly lower levels of steps, MVPA and MVPA in 10 minute bouts compared with  
55  
56  
57  
58  
59  
60

1  
2  
3 those seeking intermediate housing, though there were no differences between those  
4  
5 seeking market-rent and intermediate accommodation.  
6  
7

8  
9  
10 Fat mass % was higher in females than males though there was no difference in BMI (Table  
11  
12 1). BMI and fat mass % were higher among all older age groups compared with 16-24 year  
13  
14 olds. Participants of black ethnicity had higher levels of BMI and fat mass % compared with  
15  
16 whites; there were no differences in adiposity between Asian or other/mixed ethnic groups  
17  
18 and whites. Those with a limiting longstanding illness had higher levels of both BMI and fat  
19  
20 mass %. All PA measures were lower among females. Steps and MVPA were slightly higher  
21  
22 in 25-34 year olds and steps were also higher among 35-49 year olds compared with 16-24  
23  
24 year olds; however, there were no age group differences for MVPA in 10 minute bouts.  
25  
26  
27 Participants of black and Asian ethnicities had lower levels of steps, MVPA and MVPA in 10  
28  
29 minute bouts compared to whites. Participants who reported having a limiting longstanding  
30  
31 illness had lower levels of steps and MVPA, but not MVPA in 10 minute bouts. Educational  
32  
33 attainment level was not associated with any of the outcomes once housing sector had been  
34  
35 adjusted for and adjustment for educational attainment did not materially alter housing  
36  
37 sector differences in adiposity or PA outcomes (data available from authors).  
38  
39  
40  
41

42  
43  
44 Sensitivity analyses for PA outcomes were carried out in 931 participants who wore an  
45  
46 ActiGraph for at least four days with at least 540 minutes of recording per day  
47  
48 (Supplementary Table 4). There were no differences between market-rent and  
49  
50 intermediate groups (consistent with the main analysis presented in Table 1). Differences  
51  
52 between social and intermediate groups were broadly similar with the results presented in  
53  
54 Table 1 for the main analysis.  
55  
56  
57  
58

1  
2  
3 Differences in PA variables between housing groups were examined by day of the week to  
4  
5 explore whether differences between groups were consistent across the week (Figure 1A-  
6  
7 D). Levels of PA (steps (panel A), MVPA (panel B) and MVPA in 10 minute bouts (panel C))  
8  
9 were generally consistent across weekdays (Monday – Friday) among all groups. In the  
10  
11 intermediate group, steps were higher on Saturdays and lower on Sundays; MVPA and  
12  
13 MVPA in 10 minute bouts were lower on Sundays but there was no difference on Saturdays  
14  
15 compared to weekday activity. In the market-rent group, steps, MVPA and MVPA in 10  
16  
17 minute bouts were higher on Saturdays and similar to weekdays on Sundays. In the social  
18  
19 group, steps, MVPA and MVPA in 10 minute bouts were on average lower on Saturdays and  
20  
21 lower still on Sundays. Registered time (panel D) was lowest on average in the social group  
22  
23 during weekdays, decreasing on Saturdays and Sundays. The intermediate and market-rent  
24  
25 groups had higher levels of registered time during weekdays compared with the social group  
26  
27 which decreased on average on Saturdays and Sundays (despite recording more steps and  
28  
29 minutes in MVPA suggesting a higher intensity of activity). Mean levels of steps, MVPA, and  
30  
31 MVPA in 10 minute bouts on weekdays and differences on Saturday and Sunday compared  
32  
33 to weekdays are shown by housing sector in Supplementary Table 5. The marked  
34  
35 differences in activity between weekdays and weekend days in the social group are not  
36  
37 explained by differences in registered time (data available from authors).  
38  
39  
40  
41  
42  
43  
44  
45

46 Associations between perceived neighbourhood quality and crime scales and adiposity and  
47  
48 PA outcomes are shown in Table 2, adjusted for the participant characteristics shown in  
49  
50 Table 1. All associations between perceived neighbourhood quality and crime and outcome  
51  
52 variables were approximately linear and were therefore fitted as continuous variables in the  
53  
54 model. In addition, associations between perceived neighbourhood quality and crime and  
55  
56  
57  
58

1  
2  
3 outcome variables were similar across the three housing groups (all  $p>0.05$ ). The differences  
4  
5 between the highest and lowest quintile of each scale are presented for perceptions of  
6  
7 neighbourhood quality (median: 4, IQR: 0, 7) and neighbourhood crime (median: 2, IQR: -1,  
8  
9 5). Participants with the most positive perceptions of neighbourhood quality (highest  
10  
11 quintile) had lower BMI, higher steps and recorded longer durations of MVPA compared  
12  
13 with those who had the most negative perceptions of neighbourhood quality (lowest  
14  
15 quintile). There were no significant associations between perceptions of neighbourhood  
16  
17 crime and adiposity or PA.  
18  
19  
20  
21  
22

23 The effect of adjustment for perceived neighbourhood quality on differences in adiposity  
24  
25 and PA between housing sector groups is presented in Table 3. Adjustment for perceptions  
26  
27 of neighbourhood quality reduced differences in BMI, fat mass %, steps, MVPA and MVPA in  
28  
29 10 minute bouts between the social and intermediate groups by 10%, 6%, 10%, 10% and 7%  
30  
31 respectively. Differences between market-rent and intermediate groups in adiposity and PA  
32  
33 variables were not statistically significant before or after adjustment. A larger proportion of  
34  
35 the social-intermediate group differences in steps, MVPA and MVPA in 10 minute bouts on  
36  
37 weekends was explained by adjustment for perceptions of neighbourhood quality (11%,  
38  
39 16% and 17% respectively) compared to the differences in steps, MVPA and MVPA in 10  
40  
41 minute bouts on weekdays which were reduced by 10%, 8% and 3% respectively.  
42  
43  
44  
45  
46  
47  
48

## 49 ***Discussion***

50  
51 The results of this study showed that participants seeking social housing in East Village had  
52  
53 lower levels of PA and higher levels of adiposity compared with those seeking intermediate  
54  
55 and market-rent housing, even when adjusted for demographic factors. In the social  
56  
57  
58  
59  
60

1  
2  
3 housing group, levels of PA were particularly low on weekends compared with weekdays  
4  
5 possibly reflecting higher occupational PA and lower leisure time PA; weekday-weekend  
6  
7 differences in PA were less marked among those seeking intermediate and market-rent  
8  
9 housing. However, the lower registered time at weekends but higher MVPA and steps  
10  
11 suggests more intense activity at weekends in the intermediate and market-rent housing  
12  
13 groups. These findings may inform targeted interventions to increase PA and reduce  
14  
15 adiposity in different socioeconomic groups.  
16  
17  
18  
19  
20

21 Positive associations between perceived neighbourhood quality and PA and adiposity were  
22  
23 also shown. Adjustment for differences in perceived neighbourhood quality reduced  
24  
25 differences in PA and adiposity by approximately 10% between social and intermediate  
26  
27 housing groups; equivalent to a reduction of 111 for daily steps, 0.5 minutes for MVPA and  
28  
29 0.5kg/m<sup>2</sup> for BMI. However, a larger proportion of the difference in PA was apparent at  
30  
31 weekends; equivalent to a reduction of 222 for daily steps and 2.2 minutes for MVPA.  
32  
33  
34  
35  
36

### 37 **Relation to previous studies**

38  
39 Studies have shown that lower socioeconomic status is associated with lower levels of PA  
40  
41 (33;34), and that those from more socially deprived backgrounds have the most barriers to  
42  
43 being physically active (7). Previous research examining the role of housing tenure is limited.  
44  
45 Findings from this study showed marked differences in PA and adiposity between those  
46  
47 seeking social, intermediate and market-rent housing. In particular, lower PA and higher  
48  
49 adiposity in participants seeking social housing, a group which comprises a high proportion  
50  
51 of people from more socioeconomically disadvantaged backgrounds (28). The higher levels  
52  
53 of adiposity in those seeking social housing compared with those seeking intermediate or  
54  
55  
56  
57  
58  
59  
60



1  
2  
3 market-rent housing is consistent with systematic reviews which have found an association  
4  
5 between lower socioeconomic status and higher levels of adiposity, particularly in higher  
6  
7 income countries and among women (35). While socioeconomic status is a strong  
8  
9 determinant of housing status, to our knowledge this is the first study to explicitly examine  
10  
11 housing sector differences in objective PA and adiposity levels. However, it is important to  
12  
13 consider more broadly what these aspirational housing sector differences might represent.  
14  
15 Related studies have shown that those in social housing are less likely to use active travel  
16  
17 compared with owner occupiers (18), and that those in social housing and home owners  
18  
19 with a mortgage are more likely to be obese and have higher levels of illness and disability  
20  
21 compared to outright home owners, even after adjustment for other socioeconomic status  
22  
23 markers (36). These latter findings suggest that the effect of home ownership may be more  
24  
25 complex and cannot be simply explained by socioeconomic status. Neighbourhood quality  
26  
27 may offer a potential partial explanation for these findings (37). In the present study  
28  
29 perceptions of better neighbourhood quality were associated with PA whereas perceptions  
30  
31 of crime were not. In contrast, a large UK-based study found that perceptions of feeling  
32  
33 safe in the neighbourhood had the largest effect on levels of PA compared with perceptions  
34  
35 of leisure facilities, sense of belonging or access to public transport or amenities (38).  
36  
37 Another study in the US found that low perceived safety from crime was associated with  
38  
39 lower levels of MVPA (39). However, a recent review concluded that higher quality evidence  
40  
41 is needed, including prospective studies and natural experiments in areas of wide crime  
42  
43 variability, in order to further understand the effect of crime on physical and mental health  
44  
45 (27). Moreover, effects of perceived and objective measures of neighbourhood quality may  
46  
47 have differing and potentially independent effects on health behaviours including PA (40).  
48  
49  
50  
51  
52  
53  
54  
55  
56  
57  
58  
59  
60

1  
2  
3 Our findings showed that PA levels were particularly low on the weekend among those  
4 seeking social housing, which is consistent with findings from a systematic review which  
5 found that leisure-time PA (which may be more likely to occur on weekends) was lower  
6 amongst those from lower socioeconomic groups (8). This suggests that low-cost strategies  
7 to increase weekend PA may be particularly beneficial to more disadvantaged households.  
8  
9 A free community-based program in Bogota Colombia, temporarily closed streets on  
10 Sundays to encourage PA amongst more disadvantaged local residents (41). A similar  
11 program has been trialled in the United States (42), however the effectiveness, longevity  
12 and generalisability of these programs to other socioeconomically deprived areas is yet to  
13 be established.  
14  
15  
16  
17  
18  
19  
20  
21  
22  
23  
24  
25  
26  
27

### 28 **Strengths and limitations**

29  
30 Strengths of this study include the representation of three different aspirational housing  
31 groups which provides a wide range of socioeconomic backgrounds. Of those seeking social  
32 housing, two-thirds (67%) were currently living in social housing accommodation provided  
33 by the local authority or housing association; the remainder were largely currently living in  
34 privately rented accommodation with many on social housing waiting lists. Of those seeking  
35 intermediate or market-rent accommodation, almost two-thirds were living in privately  
36 rented accommodation (both 64%); the remainder were largely living with relatives or  
37 friends. The study sample is large with good representation from a 'hard to reach' group of  
38 social housing participants. Participation rates were high given the target group, with  
39 between 50-60% of those who initially agreed to be contacted taking part in the study. The  
40 ActiGraph GT3X+ accelerometer provided validated objective measures of PA (43) and the  
41 use of bioelectrical impedance to provide more direct measurements of adiposity including  
42  
43  
44  
45  
46  
47  
48  
49  
50  
51  
52  
53  
54  
55  
56  
57  
58  
59  
60

1  
2  
3 fat mass %, which may provide a more valid marker of adiposity than BMI, particularly in a  
4  
5 multi-ethnic population (44;45). Reassuringly the patterns of PA by sex, ethnic group and  
6  
7 health status were consistent with those published previously (46-48). A limitation of the  
8  
9 study is the lower number of participants in the market-rent sector compared with the  
10  
11 other groups. This was due to restrictions imposed on the study team on the extent and  
12  
13 duration of access to potential applicants seeking market-rent accommodation. While the  
14  
15 study is longitudinal, these analyses are cross-sectional limiting the degree to which causal  
16  
17 inferences can be made. Moreover, there is the possibility of selection amongst study  
18  
19 participants, where those who are more active seek to move to East Village, may be more  
20  
21 likely to participate in the study and may perceive their environment differently, which may  
22  
23 limit the generalisability of the findings to neighbourhoods outside of East London.  
24  
25  
26  
27  
28  
29

### 30 **Conclusions and future work**

31  
32 The findings presented in this paper suggest that perceived neighbourhood quality is  
33  
34 associated with PA and that there are substantial differences in PA and adiposity levels  
35  
36 between the three housing groups studied. In particular the very low levels of PA in the  
37  
38 social housing group during the weekend could provide a target for intervention to increase  
39  
40 levels of PA. Perceptions of neighbourhood quality reduced differences in PA and adiposity  
41  
42 between housing sector groups, and the possibility of measuring more objective markers of  
43  
44 neighbourhood quality within this study has the potential to explain more (40). The future  
45  
46 follow-up of the ENABLE London cohort will allow us to examine whether moving to 'East  
47  
48 Village', a neighbourhood designed for healthy active living, will have a positive impact on  
49  
50 PA and/or adiposity levels. A major aim of the study is to identify features of the local built  
51  
52 environment that increase levels PA which could potentially help to reduce socioeconomic  
53  
54  
55  
56  
57  
58  
59  
60

1  
2  
3 inequalities in health. It will be of particular interest to determine whether an increase in  
4  
5 PA is more apparent in the social housing group whose neighbourhood characteristics  
6  
7 should improve. Furthermore, we will be in a position to examine whether any potential  
8  
9 effects of the built environment on PA are modified by housing sector type.  
10  
11  
12  
13  
14  
15  
16  
17  
18  
19  
20  
21  
22  
23  
24  
25  
26  
27  
28  
29  
30  
31  
32  
33  
34  
35  
36  
37  
38  
39  
40  
41  
42  
43  
44  
45  
46  
47  
48  
49  
50  
51  
52  
53  
54  
55  
56  
57  
58  
59  
60

For peer review only

### Ethical approval

Full ethical approval was obtained from the relevant Multi-Centre Research Ethics Committee (REC Reference 12/LO/1031). All participants provided written informed consent.

### Availability of data and material

Further details of the ENABLE London study are available from the study website (<http://www.enable.sgul.ac.uk/>). The ongoing collection and management of data has been made possible through grant funding from the Medical Research Council and the National Institute of Health Research. We welcome proposals for collaborative projects. For general data sharing inquiries, contact Professor Owen ([cowen@sgul.ac.uk](mailto:cowen@sgul.ac.uk)).

### Competing interests

We declare that we have no competing interests.

### Funding

This research is being supported by project grants from the Medical Research Council National Prevention Research Initiative (MR/J000345/1) and National Institute for Health Research (12/211/69). Diabetes and obesity prevention research at St George's, University of London is supported by the National Institute for Health Research (NIHR) Collaboration for Leadership in Applied Health Research and Care (CLAHRC) South London. AE is funded by the UK Medical Research Council as part of the Neighbourhoods and Communities Programme (MC\_UU\_12017-10). BG-C is supported by an NHMRC Principal Research Fellowship (#1107672). ARC is supported by National Institute for Health Research (NIHR)

1  
2  
3 Bristol Nutrition Biomedical Research Unit based at University Hospitals Bristol NHS  
4  
5 Foundation Trust and the University of Bristol.  
6  
7  
8  
9

#### 10 Authorship statement

11 CGO, ARR, AE, ARC, DL, SC, BG-C, DGC and PHW designed the study and raised funding. BR,  
12  
13 ARR, CC, DP and CGO collected data for the study; BR, ARR and CGO enrolled participants.  
14  
15 CMN, BR, ARR, CC, DP and CGO undertook data management. CMN analysed the data and  
16  
17 wrote the first draft of the report. ARR, BR, AS, DP, ARC, ASP, AE, BG-C, CC, DL, SC, PHW,  
18  
19 DGC and CGO critically appraised the manuscript and approved the final draft. CGO is  
20  
21 responsible for data integrity.  
22  
23  
24  
25  
26  
27

#### 28 Acknowledgements

29  
30 The authors thank the East Thames Group, Triathlon Homes and Get Living London who  
31  
32 have assisted in recruiting participants into the ENABLE London study. The ENABLE London  
33  
34 study is advised by a Steering Committee chaired by Professor Hazel Inskip (University of  
35  
36 Southampton), with Dr David Ogilvie (University of Cambridge) and Professor Andy Jones  
37  
38 (University of East Anglia) as academic advisors and Mrs Kate Worley (formerly East Thames  
39  
40 Group Assistant Director for Strategic Housing) as the lay/stakeholder member. The authors  
41  
42 are grateful to the members of the ENABLE London study team (in particular Aine Hogan,  
43  
44 Katrin Peuker, Cathy McKay) and to participating households, without whom this study  
45  
46  
47  
48  
49 would not be possible.  
50  
51  
52  
53  
54  
55  
56  
57  
58  
59  
60

## References

- (1) Ford ES, Williamson DF, Liu S. Weight change and diabetes incidence: findings from a national cohort of US adults. *Am J Epidemiol* 1997;146:214-22.
- (2) Nocon M, Hiemann T, Muller-Riemenschneider F, Thalau F, Roll S, Willich SN. Association of physical activity with all-cause and cardiovascular mortality: a systematic review and meta-analysis. *Eur J Cardiovasc Prev Rehabil* 2008;15:239-46.
- (3) Shaper AG, Wannamethee SG, Walker M. Body weight: implications for the prevention of coronary heart disease, stroke, and diabetes mellitus in a cohort study of middle aged men. *BMJ* 1997;314:1311-7.
- (4) Whitlock G, Lewington S, Sherliker P, Clarke R, Emberson J, Halsey J, et al. Body-mass index and cause-specific mortality in 900 000 adults: collaborative analyses of 57 prospective studies. *Lancet* 2009;373:1083-96.
- (5) Lim SS, Vos T, Flaxman AD, Danaei G, Shibuya K, Adair-Rohani H, et al. A comparative risk assessment of burden of disease and injury attributable to 67 risk factors and risk factor clusters in 21 regions, 1990-2010: a systematic analysis for the Global Burden of Disease Study 2010. *Lancet* 2012;380:2224-60.
- (6) Health Survey for England. *Health Survey for England 2012: Health, social care and lifestyles*. The Information Centre; 2013 Dec.
- (7) Chinn DJ, White M, Harland J, Drinkwater C, Raybould S. Barriers to physical activity and socioeconomic position: implications for health promotion. *J Epidemiol Community Health* 1999;53:191-2.
- (8) Beenackers MA, Kamphuis CB, Giskes K, Brug J, Kunst AE, Burdorf A, et al. Socioeconomic inequalities in occupational, leisure-time, and transport related physical activity among European adults: a systematic review. *Int J Behav Nutr Phys Act* 2012;9:116.
- (9) McVeigh JA, Winkler EA, Howie EK, Tremblay MS, Smith A, Abbott RA, et al. Objectively measured patterns of sedentary time and physical activity in young adults of the Raine study cohort. *Int J Behav Nutr Phys Act* 2016;13:41.
- (10) Sigmundova D, Sigmund E, Vokacova J, Kopkova J. Parent-child associations in pedometer-determined physical activity and sedentary behaviour on weekdays and weekends in random samples of families in the Czech Republic. *Int J Environ Res Public Health* 2014;11:7163-81.
- (11) Smith GD, Egger M. Socioeconomic differences in mortality in Britain and the United States. *Am J Public Health* 1992;82:1079-81.
- (12) Dalstra JA, Kunst AE, Mackenbach JP. A comparative appraisal of the relationship of education, income and housing tenure with less than good health among the elderly in Europe. *Soc Sci Med* 2006;62:2046-60.
- (13) Ellaway A, Macdonald L, Kearns A. Are housing tenure and car access still associated with health? A repeat cross-sectional study of UK adults over a 13-year period. *BMJ Open* 2016;6:e012268.

- 1
- 2
- 3 (14) Macintyre S, Hiscock R, Kearns A, Ellaway A. Housing tenure and car access: further  
4 exploration of the nature of their relations with health in a UK setting. *J Epidemiol  
5 Community Health* 2001;55:330-1.
- 6
- 7 (15) Macintyre S, McKay L, Der G, Hiscock R. Socio-economic position and health: what you  
8 observe depends on how you measure it. *J Public Health Med* 2003;25:288-94.
- 9
- 10 (16) Harrison RA, McElduff P, Edwards R. Planning to win: Health and lifestyles associated with  
11 physical activity amongst 15,423 adults. *Public Health* 2006;120:206-12.
- 12
- 13 (17) Kendig H, Browning C, Teshuva K. Health actions and social class among older Australians.  
14 *Aust N Z J Public Health* 1998;22:808-13.
- 15
- 16 (18) Ogilvie D, Mitchell R, Mutrie N, Petticrew M, Platt S. Personal and environmental correlates  
17 of active travel and physical activity in a deprived urban population. *Int J Behav Nutr Phys  
18 Act* 2008;5:43.
- 19
- 20 (19) Boniface DR, Cottee MJ, Neal D, Skinner A. Social and demographic factors predictive of  
21 change over seven years in CHD-related behaviours in men aged 18-49 years. *Public Health*  
22 2001;115:246-52.
- 23
- 24 (20) Macintyre S, Ellaway A, Hiscock R, Kearns A, Der G, McKay L. What features of the home and  
25 the area might help to explain observed relationships between housing tenure and health?  
26 Evidence from the west of Scotland. *Health Place* 2003;9:207-18.
- 27
- 28 (21) Ellaway A, Macintyre S. Does housing tenure predict health in the UK because it exposes  
29 people to different levels of housing related hazards in the home or its surroundings? *Health  
30 Place* 1998;4:141-50.
- 31
- 32 (22) Macintyre S, Ellaway A, Der G, Ford G, Hunt K. Do housing tenure and car access predict  
33 health because they are simply markers of income or self esteem? A Scottish study. *J  
34 Epidemiol Community Health* 1998;52:657-64.
- 35
- 36 (23) Hoehner CM, Brennan Ramirez LK, Elliott MB, Handy SL, Brownson RC. Perceived and  
37 objective environmental measures and physical activity among urban adults. *Am J Prev Med*  
38 2005;28:105-16.
- 39
- 40 (24) Sallis JF, Bowles HR, Bauman A, Ainsworth BE, Bull FC, Craig CL, et al. Neighborhood  
41 environments and physical activity among adults in 11 countries. *Am J Prev Med*  
42 2009;36:484-90.
- 43
- 44 (25) Giles-Corti B, Ryan K, Foster S. Increasing density in Australia: Maximising the benefits  
45 and minimising the harm. National Heart Foundation of Australia; 2012.
- 46
- 47 (26) Foster S, Giles-Corti B. The built environment, neighborhood crime and constrained physical  
48 activity: an exploration of inconsistent findings. *Prev Med* 2008;47:241-51.
- 49
- 50 (27) da Silva IC, Payne VL, Hino AA, Varela AR, Reis RS, Ekelund U, et al. Physical Activity and  
51 Safety From Crime Among Adults: A Systematic Review. *J Phys Act Health* 2016;13:663-70.
- 52
- 53 (28) Ram B, Nightingale CM, Hudda MT, Kapetanakis VV, Ellaway A, Cooper AR, et al. Cohort  
54 profile: Examining Neighbourhood Activities in Built Living Environments in London: the  
55 ENABLE London-Olympic Park cohort. *BMJ Open* 2016;6:e012643.
- 56
- 57
- 58
- 59
- 60



- 1  
2  
3 (29) Office for National Statistics. The National Statistics Socio-economic Classification User  
4 Manual. 2005.  
5  
6 (30) Department of Health. Start active, stay active: a report on physical activity from the four  
7 home countries Chief Medical Officers. Department of Health; 2011.  
8  
9 (31) Freedson PS, Melanson E, Sirard J. Calibration of the Computer Science and Applications, Inc.  
10 accelerometer. *Med Sci Sports Exerc* 1998;30:777-81.  
11  
12 (32) Harris T, Kerry SM, Limb ES, Victor CR, Iliffe S, Ussher M, et al. Effect of a Primary Care  
13 Walking Intervention with and without Nurse Support on Physical Activity Levels in 45- to 75-  
14 Year-Olds: The Pedometer And Consultation Evaluation (PACE-UP) Cluster Randomised  
15 Clinical Trial. *PLoS Med* 2017;14:e1002210.  
16  
17 (33) Allen MS, Vella SA. Longitudinal determinants of walking, moderate, and vigorous physical  
18 activity in Australian adults. *Prev Med* 2015;78:101-4.  
19  
20 (34) Juneau CE, Sullivan A, Dodgeon B, Cote S, Ploubidis GB, Potvin L. Social class across the life  
21 course and physical activity at age 34 years in the 1970 British birth cohort. *Ann Epidemiol*  
22 2014;24:641-7, 647.  
23  
24 (35) McLaren L. Socioeconomic status and obesity. *Epidemiol Rev* 2007;29:29-48.  
25  
26 (36) Tranter B, Donoghue J. Housing tenure, body mass index and health in Australia.  
27 *International Journal of Housing Policy* 2016;1:1-20.  
28  
29 (37) Turrell G, Haynes M, Wilson LA, Giles-Corti B. Can the built environment reduce health  
30 inequalities? A study of neighbourhood socioeconomic disadvantage and walking for  
31 transport. *Health Place* 2013;19:89-98.  
32  
33 (38) Harrison RA, Gemmell I, Heller RF. The population effect of crime and neighbourhood on  
34 physical activity: an analysis of 15,461 adults. *J Epidemiol Community Health* 2007;61:34-9.  
35  
36 (39) Brown BB, Werner CM, Smith KR, Tribby CP, Miller HJ. Physical activity mediates the  
37 relationship between perceived crime safety and obesity. *Prev Med* 2014;66:140-4.  
38  
39 (40) McGinn AP, Evenson KR, Herring AH, Huston SL, Rodriguez DA. Exploring associations  
40 between physical activity and perceived and objective measures of the built environment. *J*  
41 *Urban Health* 2007;84:162-84.  
42  
43 (41) Sarmiento O, Torres A, Jacoby E, Pratt M, Schmid TL, Stierling G. The Ciclovía-Recreativa: A  
44 mass-recreational program with public health potential. *J Phys Act Health* 2010;7 Suppl  
45 2:S163-S180.  
46  
47 (42) Hipp JA, Eyler AA, Zieff SG, Samuelson MA. Taking physical activity to the streets: the  
48 popularity of Ciclovía and Open Streets initiatives in the United States. *Am J Health Promot*  
49 2014;28:S114-S115.  
50  
51 (43) Santos-Lozano A, Santin-Medeiros F, Cardon G, Torres-Luque G, Bailon R, Bergmeir C, et al.  
52 Actigraph GT3X: validation and determination of physical activity intensity cut points. *Int J*  
53 *Sports Med* 2013;34:975-82.  
54  
55  
56  
57  
58

- 1  
2  
3 (44) Deurenberg P, Yap M, van Staveren WA. Body mass index and percent body fat: a meta  
4 analysis among different ethnic groups. *Int J Obes Relat Metab Disord* 1998;22:1164-71.  
5  
6 (45) Gallagher D, Visser M, Sepulveda D, Pierson RN, Harris T, Heymsfield SB. How useful is body  
7 mass index for comparison of body fatness across age, sex, and ethnic groups? *Am J*  
8 *Epidemiol* 1996;143:228-39.  
9  
10 (46) Hayes L, White M, Unwin N, Bhopal R, Fischbacher C, Harland J, et al. Patterns of physical  
11 activity and relationship with risk markers for cardiovascular disease and diabetes in Indian,  
12 Pakistani, Bangladeshi and European adults in a UK population. *J Public Health Med*  
13 *2002;24:170-8*.  
14  
15 (47) Health and Social Care Information Centre. Health Survey for England 2004: The health of  
16 ethnic minority groups. The Information Centre; 2006.  
17  
18 (48) Health and Social Care Information Centre. Health Survey for England - 2008: Physical  
19 activity and fitness. NHS Digital; 2009.  
20  
21  
22  
23  
24  
25  
26  
27  
28  
29  
30  
31  
32  
33  
34  
35  
36  
37  
38  
39  
40  
41  
42  
43  
44  
45  
46  
47  
48  
49  
50  
51  
52  
53  
54  
55  
56  
57  
58  
59  
60

Table 1: Associations between participant characteristics and adiposity and physical activity

|                           |     | Difference/% difference* in adiposity/physical activity |                |         |            |                |         |        |                |         |                        |                 |         |                                           |                 |         |
|---------------------------|-----|---------------------------------------------------------|----------------|---------|------------|----------------|---------|--------|----------------|---------|------------------------|-----------------|---------|-------------------------------------------|-----------------|---------|
| n                         |     | BMI (kg/m <sup>2</sup> )*                               |                |         | Fat mass % |                |         | Steps† |                |         | Minutes spent in MVPA† |                 |         | Minutes spent in MVPA in 10 minute bouts† |                 |         |
| <b>Sex</b>                |     |                                                         |                |         |            |                |         |        |                |         |                        |                 |         |                                           |                 |         |
| Male (Ref)                | 522 | -                                                       |                |         | -          |                |         | -      |                |         | -                      |                 |         | -                                         |                 |         |
| Female                    | 718 | -1.16                                                   | (-3.17, 0.89)  | 0.26    | 11.11      | (10.25, 11.98) | <0.0001 | -570   | (-946, -194)   | 0.003   | -9.29                  | (-12.21, -6.36) | <0.0001 | -4.06                                     | (-6.12, -2.01)  | <0.001  |
| <b>Age group</b>          |     |                                                         |                |         |            |                |         |        |                |         |                        |                 |         |                                           |                 |         |
| Age 16-24 (Ref)           | 269 | -                                                       |                |         | -          |                |         | -      |                |         | -                      |                 |         | -                                         |                 |         |
| Age 25-34                 | 531 | 6.26                                                    | (3.51, 9.08)   | <0.0001 | 3.20       | (2.10, 4.31)   | <0.0001 | 502    | (11, 992)      | 0.04    | 4.03                   | (0.19, 7.87)    | 0.04    | 0.95                                      | (-1.87, 3.77)   | 0.51    |
| Age 35-49                 | 358 | 13.35                                                   | (10.16, 16.63) | <0.0001 | 6.36       | (5.16, 7.56)   | <0.0001 | 699    | (173, 1,224)   | 0.01    | 3.85                   | (-0.25, 7.95)   | 0.07    | -1.11                                     | (-4.05, 1.83)   | 0.46    |
| Age 50+                   | 82  | 17.61                                                   | (12.55, 22.89) | <0.0001 | 9.18       | (7.33, 11.03)  | <0.0001 | -9     | (-832, 813)    | 0.98    | -5.98                  | (-12.43, 0.47)  | 0.07    | -2.04                                     | (-6.79, 2.72)   | 0.40    |
| <b>Ethnic group</b>       |     |                                                         |                |         |            |                |         |        |                |         |                        |                 |         |                                           |                 |         |
| White (Ref)               | 595 | -                                                       |                |         | -          |                |         | -      |                |         | -                      |                 |         | -                                         |                 |         |
| Black                     | 314 | 6.23                                                    | (3.26, 9.28)   | <0.0001 | 3.63       | (2.44, 4.83)   | <0.0001 | -1,116 | (-1,657, -575) | <0.0001 | -7.42                  | (-11.68, -3.17) | <0.001  | -6.61                                     | (-9.82, -3.41)  | <0.0001 |
| Asian                     | 210 | -0.28                                                   | (-3.14, 2.67)  | 0.85    | 0.02       | (-1.20, 1.25)  | 0.97    | -1,409 | (-1,972, -845) | <0.0001 | -11.46                 | (-15.89, -7.03) | <0.0001 | -8.11                                     | (-11.43, -4.79) | <0.0001 |
| Other/Mixed               | 121 | 1.29                                                    | (-2.27, 4.98)  | 0.48    | 1.04       | (-0.47, 2.55)  | 0.18    | -430   | (-1,100, 239)  | 0.21    | -4.57                  | (-9.83, 0.69)   | 0.09    | -3.95                                     | (-7.86, -0.04)  | 0.05    |
| <b>Limiting illness</b>   |     |                                                         |                |         |            |                |         |        |                |         |                        |                 |         |                                           |                 |         |
| No (Ref)                  | 108 | -                                                       |                |         | -          |                |         | -      |                |         | -                      |                 |         | -                                         |                 |         |
| Yes                       | 7   | -                                                       |                |         | -          |                |         | -      |                |         | -                      |                 |         | -                                         |                 |         |
| Yes                       | 153 | 4.29                                                    | (1.13, 7.55)   | 0.01    | 1.63       | (0.33, 2.92)   | 0.01    | -1,081 | (-1,666, -496) | <0.001  | -5.69                  | (-10.27, -1.12) | 0.01    | -2.78                                     | (-6.10, 0.55)   | 0.10    |
| <b>Housing sector</b>     |     |                                                         |                |         |            |                |         |        |                |         |                        |                 |         |                                           |                 |         |
| Social Intermediate (Ref) | 512 | -                                                       |                |         | -          |                |         | -      |                |         | -                      |                 |         | -                                         |                 |         |
| Market-rent               | 503 | -                                                       |                |         | -          |                |         | -      |                |         | -                      |                 |         | -                                         |                 |         |
| Market-rent               | 225 | -0.81                                                   | (-3.56, 2.02)  | 0.57    | -0.23      | (-1.42, 0.96)  | 0.70    | -104   | (-633, 424)    | 0.70    | 2.26                   | (-1.90, 6.42)   | 0.29    | 2.82                                      | (-0.35, 5.98)   | 0.08    |

\* Percentage differences are presented for log transformed variables

All differences/% differences are mutually adjusted for sex, age group, ethnic group, limiting longstanding illness, housing sector and a random effect to allow for clustering at household level

† Missing data for 133 participants

Table 2: Associations between neighbourhood perceptions scales and adiposity and physical activity

| Adiposity (N = 1240)                  | Difference / % difference in outcome between the highest and lowest quintiles for each neighbourhood factor (95% CI), p-value |                    |      |                               |                   |      |
|---------------------------------------|-------------------------------------------------------------------------------------------------------------------------------|--------------------|------|-------------------------------|-------------------|------|
|                                       | Perceptions of NH quality scale                                                                                               |                    |      | Perceptions of NH crime scale |                   |      |
| Body mass index (kg/m <sup>2</sup> )* | -3.58                                                                                                                         | (-6.47, -0.60)     | 0.02 | -2.15                         | (-5.45, 1.26)     | 0.21 |
| Fat mass %                            | -1.23                                                                                                                         | (-2.51, 0.06)      | 0.06 | -0.76                         | (-2.20, 0.69)     | 0.30 |
| Physical activity (N = 1107)          |                                                                                                                               |                    |      |                               |                   |      |
| Steps                                 | 677.49                                                                                                                        | (107.99, 1,246.99) | 0.02 | 63.05                         | (-713.40, 587.31) | 0.85 |
| MVPA (minutes)                        | 4.49                                                                                                                          | (0.02, 8.95)       | 0.05 | 1.06                          | (-4.03, 6.16)     | 0.68 |
| MVPA in 10 minute bouts (minutes)     | 2.67                                                                                                                          | (-0.63, 5.97)      | 0.11 | 2.37                          | (-1.39, 6.13)     | 0.22 |

\* % differences are shown for log transformed variables

All differences/% differences are adjusted for sex, age group, ethnic group, limiting longstanding illness, housing sector and a random effect to allow for clustering at household level.

Abbreviations: NH, neighbourhood

Table 3: Body size, adiposity and physical activity differences between housing sectors: adjustment for perceptions of neighbourhood quality

| Adiposity (N = 1240)                  | Housing sector group | Difference / % difference* compared to intermediate housing group (95% confidence interval), p-value |                 |                                                                 |        |                 |         |
|---------------------------------------|----------------------|------------------------------------------------------------------------------------------------------|-----------------|-----------------------------------------------------------------|--------|-----------------|---------|
|                                       |                      | Model 1                                                                                              |                 | Model 2 (Additionally adjusted for neighbourhood quality scale) |        |                 |         |
| Body mass index (kg/m <sup>2</sup> )* | Social               | 4.96                                                                                                 | (2.21, 7.78)    | <0.001                                                          | 4.45   | (1.67, 7.31)    | 0.002   |
|                                       | Intermediate         | Reference group                                                                                      |                 |                                                                 |        |                 |         |
|                                       | Market rent          | -0.81                                                                                                | (-3.56, 2.02)   | 0.57                                                            | -0.85  | (-3.60, 1.98)   | 0.55    |
| Fat mass %                            | Social               | 2.66                                                                                                 | (1.54, 3.78)    | <0.0001                                                         | 2.49   | (1.35, 3.63)    | <0.0001 |
|                                       | Intermediate         | Reference group                                                                                      |                 |                                                                 |        |                 |         |
|                                       | Market rent          | -0.23                                                                                                | (-1.42, 0.96)   | 0.70                                                            | -0.25  | (-1.43, 0.94)   | 0.68    |
| Physical activity (N = 1107)          |                      |                                                                                                      |                 |                                                                 |        |                 |         |
| Steps                                 | Social               | -1,125                                                                                               | (-1,629, -620)  | <0.0001                                                         | -1,016 | (-1,531, -501)  | <0.001  |
|                                       | Intermediate         | Reference group                                                                                      |                 |                                                                 |        |                 |         |
|                                       | Market rent          | -104                                                                                                 | (-633, 424)     | 0.70                                                            | -96    | (-624, 431)     | 0.72    |
| MVPA (minutes)                        | Social               | -7.53                                                                                                | (-11.50, -3.55) | <0.001                                                          | -6.76  | (-10.81, -2.71) | 0.001   |
|                                       | Intermediate         | Reference group                                                                                      |                 |                                                                 |        |                 |         |
|                                       | Market rent          | 2.26                                                                                                 | (-1.90, 6.42)   | 0.29                                                            | 2.32   | (-1.84, 6.47)   | 0.27    |
| MVPA in 10 minute bouts (minutes)     | Social               | -6.49                                                                                                | (-9.50, -3.48)  | <0.0001                                                         | -6.03  | (-9.10, -2.95)  | <0.001  |
|                                       | Intermediate         | Reference group                                                                                      |                 |                                                                 |        |                 |         |
|                                       | Market rent          | 2.82                                                                                                 | (-0.35, 5.98)   | 0.08                                                            | 2.85   | (-0.31, 6.01)   | 0.08    |

\* % differences are shown for log transformed variables

Model 1 is adjusted for sex, age group, ethnic group, limiting longstanding illness and clustering at household level (random effect)

Model 2: Adjusted for Model 1 plus perceived neighbourhood quality

1  
2  
3  
4 Figure 1: Daily physical activity by day of the week and housing sector group: N = 6206 days from 1107 participants  
5  
6  
7

8 Means and 95% confidence intervals are adjusted for sex, age group, ethnic group, limiting longstanding illness, month of recording, day order of recording, day of week, housing  
9 sector, an interaction between housing sector and day of week and random effects to allow for multiple days of measurement and clustering of participants within households  
10  
11  
12  
13  
14  
15  
16  
17  
18  
19  
20  
21  
22  
23  
24  
25  
26  
27  
28  
29  
30  
31  
32  
33  
34  
35  
36  
37  
38  
39  
40  
41  
42  
43  
44  
45  
46  
47

For peer review only

1  
2  
3  
4  
5  
6  
7  
8  
9  
10  
11  
12  
13  
14  
15  
16  
17  
18  
19  
20  
21  
22  
23  
24  
25  
26  
27  
28  
29  
30  
31  
32  
33  
34  
35  
36  
37  
38  
39  
40  
41  
42  
43  
44  
45  
46  
47  
48  
49  
50  
51  
52  
53  
54  
55  
56  
57  
58  
59  
60

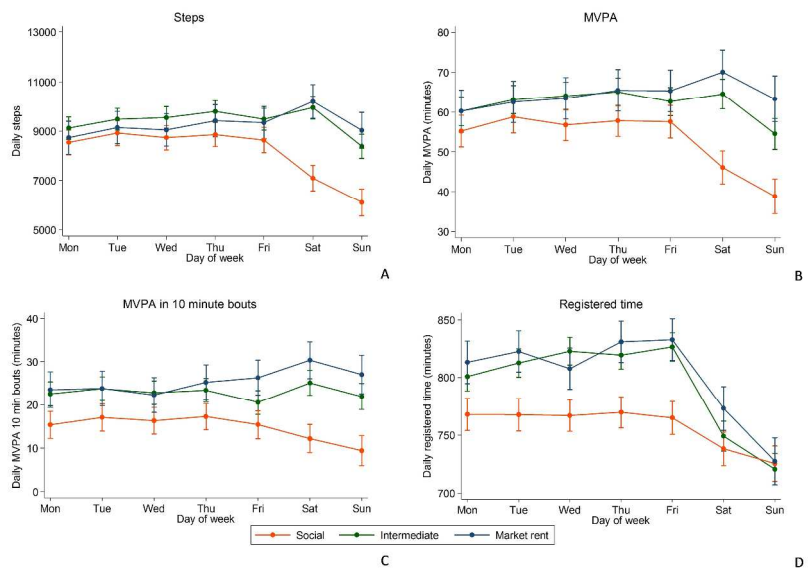

514x309mm (300 x 300 DPI)

Review only

1  
2 **Supplementary material**  
3

4 Supplementary Table 1: Questionnaire items included the factor analysis on perceptions of the neighbourhood  
5

6  
7 **Perceptions of neighbourhood crime items**

8 There is a lot of crime in my neighbourhood.  
9 The level of crime in my neighbourhood makes it unsafe to walk on the streets at night.  
10 There are threatening groups of young people in my neighbourhood.  
11 The level of crime in my neighbourhood makes it unsafe to walk on the streets during the day.  
12 Vandalism, graffiti or deliberate damage to property is a problem in my local area.  
13

14 **Perceptions of neighbourhood quality items**

15 I enjoy walking in my neighbourhood.  
16 This area is a place I enjoy living in.  
17 My neighbourhood is attractive to look at (e.g. there are attractive buildings, green space. Landscaping views).  
18 This area has good leisure things for people like myself, leisure centres or community centres for example.  
19 You often see people out on walks or riding their bicycles in my neighbourhood.  
20 This area has good local transport.  
21

22 **Additional items included in the factor analysis with factor loadings below 0.4 and were therefore not included in the solution**

23 My neighbourhood is generally free from litter.  
24 There is too much traffic in my neighbourhood.  
25 Our neighbourhood streets have good lighting at night.  
26  
27  
28

29 Participants were asked to select a response from the following for all questionnaire items stated in the table:- Strongly agree, Agree, Neither agree nor disagree, Disagree,  
30 Strongly disagree.  
31  
32  
33  
34  
35  
36  
37  
38  
39  
40  
41  
42  
43  
44  
45  
46



Supplementary Table 2: Participant characteristics for 1240 adults with measurements of adiposity at baseline

|                                  | Social<br>(n = 512) |         | Housing sector<br>Intermediate<br>(n = 503) |         | Private<br>(n = 225) |         | Total<br>(N = 1240) |         | p ( $\chi^2$ ) |
|----------------------------------|---------------------|---------|---------------------------------------------|---------|----------------------|---------|---------------------|---------|----------------|
| <b>Sex</b>                       |                     |         |                                             |         |                      |         |                     |         |                |
| Male                             | 137                 | (26.8%) | 259                                         | (51.5%) | 126                  | (56.0%) | 522                 | (42.1%) |                |
| Female                           | 375                 | (73.2%) | 244                                         | (48.5%) | 99                   | (44.0%) | 718                 | (57.9%) | <0.0001        |
| <b>Age group</b>                 |                     |         |                                             |         |                      |         |                     |         |                |
| 16-24                            | 107                 | (20.9%) | 92                                          | (18.3%) | 70                   | (31.1%) | 269                 | (21.7%) |                |
| 25-34                            | 129                 | (25.2%) | 291                                         | (57.9%) | 111                  | (49.3%) | 531                 | (42.8%) |                |
| 35-49                            | 233                 | (45.5%) | 102                                         | (20.3%) | 23                   | (10.2%) | 358                 | (28.9%) |                |
| 50+                              | 43                  | (8.4%)  | 18                                          | (3.6%)  | 21                   | (9.3%)  | 82                  | (6.6%)  | <0.0001        |
| <b>Ethnic group</b>              |                     |         |                                             |         |                      |         |                     |         |                |
| White                            | 96                  | (18.8%) | 342                                         | (68.0%) | 157                  | (69.8%) | 595                 | (48.0%) |                |
| Black                            | 245                 | (47.9%) | 53                                          | (10.5%) | 16                   | (7.1%)  | 314                 | (25.3%) |                |
| Asian                            | 107                 | (20.9%) | 75                                          | (14.9%) | 28                   | (12.4%) | 210                 | (16.9%) |                |
| Mixed/Other                      | 64                  | (12.5%) | 33                                          | (6.6%)  | 24                   | (10.7%) | 121                 | (9.8%)  | <0.0001        |
| <b>NS-SEC*</b>                   |                     |         |                                             |         |                      |         |                     |         |                |
| Higher Managerial / Professional | 60                  | (11.9%) | 357                                         | (71.4%) | 150                  | (66.7%) | 567                 | (46.1%) |                |
| Intermediate Occupations         | 62                  | (12.3%) | 77                                          | (15.4%) | 38                   | (16.9%) | 177                 | (14.4%) |                |
| Routine / Manual                 | 125                 | (24.8%) | 34                                          | (6.8%)  | 10                   | (4.4%)  | 169                 | (13.7%) |                |
| Economically inactive            | 258                 | (51.1%) | 32                                          | (6.4%)  | 27                   | (12.0%) | 317                 | (25.8%) | <0.0001        |
| <b>Limiting illness</b>          |                     |         |                                             |         |                      |         |                     |         |                |
| Yes                              | 102                 | (19.9%) | 40                                          | (8.0%)  | 11                   | (4.9%)  | 153                 | (12.3%) |                |
| No                               | 410                 | (80.1%) | 463                                         | (92.0%) | 214                  | (95.1%) | 1087                | (87.7%) | <0.0001        |

p ( $\chi^2$ ): p-value for Chi-squared test

\* 10 responses missing for NS-SEC group

Supplementary Table 3: Mean levels of adiposity and physical activity by participant characteristics

|                         | n    | Mean/Geometric mean* levels adiposity and physical activity |                   |                      |                        |                                           |
|-------------------------|------|-------------------------------------------------------------|-------------------|----------------------|------------------------|-------------------------------------------|
|                         |      | BMI (kg/m <sup>2</sup> )*                                   | Fat mass %        | Steps†               | Minutes spent in MVPA† | Minutes spent in MVPA in 10 minute bouts† |
| <b>Sex</b>              |      |                                                             |                   |                      |                        |                                           |
| Male                    | 522  | 25.4 (25.0, 25.8)                                           | 20.4 (19.7, 21.0) | 9,279 (8,991, 9,568) | 64.8 (62.6, 67.1)      | 22.8 (21.1, 24.4)                         |
| Female                  | 718  | 25.1 (24.8, 25.5)                                           | 31.5 (30.9, 32.0) | 8,709 (8,464, 8,954) | 55.6 (53.6, 57.5)      | 18.7 (17.3, 20.1)                         |
| <b>Age group</b>        |      |                                                             |                   |                      |                        |                                           |
| Age 16-24               | 269  | 23.5 (23.0, 24.0)                                           | 23.0 (22.1, 23.9) | 8,534 (8,136, 8,932) | 57.0 (53.9, 60.2)      | 20.5 (18.2, 22.8)                         |
| Age 25-34               | 531  | 25.0 (24.6, 25.3)                                           | 26.2 (25.5, 26.8) | 9,035 (8,744, 9,326) | 61.1 (58.8, 63.3)      | 21.4 (19.7, 23.1)                         |
| Age 35-49               | 358  | 26.6 (26.1, 27.1)                                           | 29.3 (28.5, 30.1) | 9,232 (8,879, 9,585) | 60.9 (58.1, 63.6)      | 19.4 (17.3, 21.4)                         |
| Age 50+                 | 82   | 27.6 (26.6, 28.7)                                           | 32.2 (30.5, 33.8) | 8,525 (7,800, 9,249) | 51.1 (45.4, 56.7)      | 18.4 (14.2, 22.7)                         |
| <b>Ethnic group</b>     |      |                                                             |                   |                      |                        |                                           |
| White                   | 595  | 24.9 (24.5, 25.2)                                           | 25.8 (25.1, 26.4) | 9,491 (9,203, 9,779) | 63.6 (61.3, 65.8)      | 23.7 (22.0, 25.4)                         |
| Black                   | 314  | 26.4 (25.8, 27.0)                                           | 29.4 (28.5, 30.3) | 8,375 (7,961, 8,789) | 56.2 (52.9, 59.4)      | 17.1 (14.7, 19.6)                         |
| Asian                   | 210  | 24.8 (24.2, 25.4)                                           | 25.8 (24.8, 26.8) | 8,082 (7,608, 8,556) | 52.1 (48.4, 55.8)      | 15.6 (12.8, 18.4)                         |
| Other/Mixed             | 121  | 25.2 (24.4, 26.0)                                           | 26.8 (25.5, 28.1) | 9,060 (8,465, 9,656) | 59.0 (54.3, 63.7)      | 19.8 (16.3, 23.3)                         |
| <b>Limiting illness</b> |      |                                                             |                   |                      |                        |                                           |
| No                      | 1087 | 25.1 (24.9, 25.4)                                           | 26.6 (26.1, 27.0) | 9,077 (8,877, 9,277) | 60.1 (58.6, 61.7)      | 20.8 (19.6, 21.9)                         |
| Yes                     | 153  | 26.2 (25.5, 27.0)                                           | 28.2 (27.0, 29.4) | 7,996 (7,447, 8,545) | 54.4 (50.1, 58.7)      | 18.0 (14.8, 21.1)                         |
| <b>Housing sector</b>   |      |                                                             |                   |                      |                        |                                           |
| Social                  | 512  | 26.0 (25.6, 26.5)                                           | 28.4 (27.6, 29.1) | 8,298 (7,953, 8,642) | 54.6 (51.8, 57.3)      | 16.0 (14.0, 18.1)                         |
| Intermediate            | 503  | 24.8 (24.4, 25.2)                                           | 25.7 (25.0, 26.4) | 9,422 (9,110, 9,735) | 62.1 (59.6, 64.5)      | 22.5 (20.6, 24.4)                         |
| Market-rent             | 225  | 24.6 (24.0, 25.2)                                           | 25.5 (24.5, 26.5) | 9,318 (8,863, 9,773) | 64.3 (60.8, 67.9)      | 25.3 (22.6, 28.1)                         |

\* Geometric means are presented for log transformed variables

All means/geometric means are adjusted for sex, age group, ethnic group, limiting longstanding illness, housing sector and a random effect to allow for clustering at household level

† Missing data for 133 participants

Supplementary Table 4: Associations between participant characteristics and physical activity variables in participants with at least 4 days of recording of physical activity data

|                         |     | Difference/% difference* in physical activity variable |                    |         |                       |                 |         |                                          |                 |         |
|-------------------------|-----|--------------------------------------------------------|--------------------|---------|-----------------------|-----------------|---------|------------------------------------------|-----------------|---------|
|                         |     | Steps                                                  |                    |         | Minutes spent in MVPA |                 |         | Minutes spent in MVPA in 10 minute bouts |                 |         |
|                         | n   |                                                        |                    |         |                       |                 |         |                                          |                 |         |
| <b>Sex</b>              |     |                                                        |                    |         |                       |                 |         |                                          |                 |         |
| Male (Ref)              | 402 | -                                                      |                    |         | -                     |                 |         | -                                        |                 |         |
| Female                  | 529 | -559.1                                                 | (-946.6, -171.7)   | 0.005   | -9.73                 | (-12.75, -6.71) | <0.0001 | -4.65                                    | (-6.78, -2.53)  | <0.0001 |
| <b>Age group</b>        |     |                                                        |                    |         |                       |                 |         |                                          |                 |         |
| Age 16-24 (Ref)         | 180 | -                                                      |                    |         | -                     |                 |         | -                                        |                 |         |
| Age 25-34               | 412 | 409.9                                                  | (-115.7, 935.6)    | 0.13    | 3.01                  | (-1.15, 7.16)   | 0.16    | -0.26                                    | (-3.28, 2.77)   | 0.87    |
| Age 35-49               | 276 | 520.2                                                  | (-45.2, 1,085.6)   | 0.07    | 2.48                  | (-1.96, 6.92)   | 0.27    | -2.50                                    | (-5.67, 0.68)   | 0.12    |
| Age 50+                 | 63  | -25.5                                                  | (-889.1, 838.1)    | 0.95    | -7.94                 | (-14.78, -1.10) | 0.02    | -3.23                                    | (-8.22, 1.76)   | 0.20    |
| <b>Ethnic group</b>     |     |                                                        |                    |         |                       |                 |         |                                          |                 |         |
| White (Ref)             | 482 | -                                                      |                    |         | -                     |                 |         | -                                        |                 |         |
| Black                   | 214 | -1,213.5                                               | (-1,788.9, -638.0) | <0.0001 | -7.08                 | (-11.67, -2.49) | 0.002   | -6.46                                    | (-9.87, -3.06)  | <0.001  |
| Asian                   | 142 | -1,128.3                                               | (-1,718.8, -537.7) | <0.001  | -10.29                | (-14.99, -5.59) | <0.0001 | -7.79                                    | (-11.26, -4.32) | <0.0001 |
| Other/Mixed             | 93  | -581.5                                                 | (-1,273.4, 110.4)  | 0.10    | -4.73                 | (-10.21, 0.76)  | 0.09    | -4.20                                    | (-8.21, -0.18)  | 0.04    |
| <b>Limiting illness</b> |     |                                                        |                    |         |                       |                 |         |                                          |                 |         |
| No (Ref)                | 834 | -                                                      |                    |         | -                     |                 |         | -                                        |                 |         |
| Yes                     | 97  | -976.1                                                 | (-1,611.5, -340.6) | 0.003   | -4.63                 | (-9.63, 0.37)   | 0.07    | -1.98                                    | (-5.59, 1.63)   | 0.28    |
| <b>Housing sector</b>   |     |                                                        |                    |         |                       |                 |         |                                          |                 |         |
| Social                  | 332 | -977.5                                                 | (-1,514.6, -440.5) | <0.001  | -6.87                 | (-11.16, -2.58) | 0.002   | -7.21                                    | (-10.40, -4.01) | <0.0001 |
| Intermediate (Ref)      | 410 | -                                                      |                    |         | -                     |                 |         | -                                        |                 |         |
| Market-rent             | 189 | -358.7                                                 | (-888.8, 171.4)    | 0.18    | 0.24                  | (-4.00, 4.48)   | 0.91    | 0.94                                     | (-2.23, 4.12)   | 0.56    |

All differences are mutually adjusted for sex, age group, ethnic group, limiting longstanding illness, housing sector and a random effect to allow for clustering at household level.

Supplementary Table 5: Physical Activity differences between weekday (Monday-Friday) and weekend (Saturday, Sunday) activity: by housing sector

| Physical activity variable (N = 1107) | Housing sector group | Mean (95% CI) weekday (Mon-Fri) activity |                | Difference in PA outcome compared to weekdays (95% confidence interval), p-value |                  |         |                  |                  |         |
|---------------------------------------|----------------------|------------------------------------------|----------------|----------------------------------------------------------------------------------|------------------|---------|------------------|------------------|---------|
|                                       |                      |                                          |                | Saturday - weekday                                                               |                  |         | Sunday - weekday |                  |         |
| Steps                                 | Social               | 8,733                                    | (8,364, 9,103) | -1,643                                                                           | (-2,078, -1,207) | <0.0001 | -2,629           | (-3,093, -2,164) | <0.0001 |
|                                       | Intermediate         | 9,497                                    | (9,178, 9,817) | 460                                                                              | (59, 862)        | 0.02    | -1,104           | (-1,528, -680)   | <0.0001 |
|                                       | Market-rent          | 9,146                                    | (8,673, 9,619) | 1,055                                                                            | (467, 1,642)     | <0.001  | -102             | (-734, 531)      | 0.75    |
| MVPA (minutes)                        | Social               | 57.2                                     | (54.3, 60.1)   | -11.2                                                                            | (-14.7, -7.7)    | <0.0001 | -18.4            | (-22.1, -14.7)   | <0.0001 |
|                                       | Intermediate         | 63.1                                     | (60.6, 65.7)   | 1.5                                                                              | (-1.8, 4.7)      | 0.37    | -8.5             | (-11.9, -5.1)    | <0.0001 |
|                                       | Market-rent          | 63.5                                     | (59.8, 67.3)   | 6.6                                                                              | (1.9, 11.3)      | 0.01    | -0.1             | (-5.2, 5.0)      | 0.97    |
| MVPA in 10 minute bouts (minutes)     | Social               | 16.3                                     | (14.0, 18.5)   | -4.1                                                                             | (-6.9, -1.3)     | 0.004   | -6.8             | (-9.8, -3.9)     | <0.0001 |
|                                       | Intermediate         | 22.6                                     | (20.7, 24.6)   | 2.5                                                                              | (-0.1, 5.1)      | 0.06    | -0.7             | (-3.4, 2.0)      | 0.62    |
|                                       | Market-rent          | 24.2                                     | (21.3, 27.1)   | 6.1                                                                              | (2.4, 9.9)       | 0.001   | 2.8              | (-1.2, 6.9)      | 0.17    |

Means and differences (95% CIs) are adjusted for sex, age group, ethnic group, limiting longstanding illness, month of recording, day order of recording, day of the week, housing sector, an interaction between housing sector and day of week and random effects to allow for multiple days of measurement and clustering of participants within household.

**STROBE 2007 (v4) Statement—Checklist of items that should be included in reports of *cross-sectional studies***

| Section/Topic                | Item # | Recommendation                                                                                                                                                                       | Reported on page # |
|------------------------------|--------|--------------------------------------------------------------------------------------------------------------------------------------------------------------------------------------|--------------------|
| <b>Title and abstract</b>    | 1      | (a) Indicate the study’s design with a commonly used term in the title or the abstract                                                                                               | 1                  |
|                              |        | (b) Provide in the abstract an informative and balanced summary of what was done and what was found                                                                                  | 2                  |
| <b>Introduction</b>          |        |                                                                                                                                                                                      |                    |
| Background/rationale         | 2      | Explain the scientific background and rationale for the investigation being reported                                                                                                 | 4-5                |
| Objectives                   | 3      | State specific objectives, including any prespecified hypotheses                                                                                                                     | 6                  |
| <b>Methods</b>               |        |                                                                                                                                                                                      |                    |
| Study design                 | 4      | Present key elements of study design early in the paper                                                                                                                              | 6-7                |
| Setting                      | 5      | Describe the setting, locations, and relevant dates, including periods of recruitment, exposure, follow-up, and data collection                                                      | 6-7                |
| Participants                 | 6      | (a) Give the eligibility criteria, and the sources and methods of selection of participants                                                                                          | 6-7                |
| Variables                    | 7      | Clearly define all outcomes, exposures, predictors, potential confounders, and effect modifiers. Give diagnostic criteria, if applicable                                             | 7-8                |
| Data sources/<br>measurement | 8*     | For each variable of interest, give sources of data and details of methods of assessment (measurement). Describe comparability of assessment methods if there is more than one group | 7-8                |
| Bias                         | 9      | Describe any efforts to address potential sources of bias                                                                                                                            | 9                  |
| Study size                   | 10     | Explain how the study size was arrived at                                                                                                                                            | 6-7                |
| Quantitative variables       | 11     | Explain how quantitative variables were handled in the analyses. If applicable, describe which groupings were chosen and why                                                         | 9                  |
| Statistical methods          | 12     | (a) Describe all statistical methods, including those used to control for confounding                                                                                                | 9-10               |
|                              |        | (b) Describe any methods used to examine subgroups and interactions                                                                                                                  | 9-10               |
|                              |        | (c) Explain how missing data were addressed                                                                                                                                          | N/A                |
|                              |        | (d) If applicable, describe analytical methods taking account of sampling strategy                                                                                                   | 9-10               |
|                              |        | (e) Describe any sensitivity analyses                                                                                                                                                | 9                  |
| <b>Results</b>               |        |                                                                                                                                                                                      |                    |

|                          |     |                                                                                                                                                                                                              |       |
|--------------------------|-----|--------------------------------------------------------------------------------------------------------------------------------------------------------------------------------------------------------------|-------|
| Participants             | 13* | (a) Report numbers of individuals at each stage of study—eg numbers potentially eligible, examined for eligibility, confirmed eligible, included in the study, completing follow-up, and analysed            | 10    |
|                          |     | (b) Give reasons for non-participation at each stage                                                                                                                                                         | 10    |
|                          |     | (c) Consider use of a flow diagram                                                                                                                                                                           | N/A   |
| Descriptive data         | 14* | (a) Give characteristics of study participants (eg demographic, clinical, social) and information on exposures and potential confounders                                                                     | 10-11 |
|                          |     | (b) Indicate number of participants with missing data for each variable of interest                                                                                                                          | 10    |
| Outcome data             | 15* | Report numbers of outcome events or summary measures                                                                                                                                                         | 10-11 |
| Main results             | 16  | (a) Give unadjusted estimates and, if applicable, confounder-adjusted estimates and their precision (eg, 95% confidence interval). Make clear which confounders were adjusted for and why they were included | 10-11 |
|                          |     | (b) Report category boundaries when continuous variables were categorized                                                                                                                                    | 11    |
|                          |     | (c) If relevant, consider translating estimates of relative risk into absolute risk for a meaningful time period                                                                                             | N/A   |
| Other analyses           | 17  | Report other analyses done—eg analyses of subgroups and interactions, and sensitivity analyses                                                                                                               | 11    |
| <b>Discussion</b>        |     |                                                                                                                                                                                                              |       |
| Key results              | 18  | Summarise key results with reference to study objectives                                                                                                                                                     | 13-14 |
| Limitations              | 19  | Discuss limitations of the study, taking into account sources of potential bias or imprecision. Discuss both direction and magnitude of any potential bias                                                   | 16-17 |
| Interpretation           | 20  | Give a cautious overall interpretation of results considering objectives, limitations, multiplicity of analyses, results from similar studies, and other relevant evidence                                   | 17    |
| Generalisability         | 21  | Discuss the generalisability (external validity) of the study results                                                                                                                                        | 17    |
| <b>Other information</b> |     |                                                                                                                                                                                                              |       |
| Funding                  | 22  | Give the source of funding and the role of the funders for the present study and, if applicable, for the original study on which the present article is based                                                | 19-20 |

\*Give information separately for cases and controls in case-control studies and, if applicable, for exposed and unexposed groups in cohort and cross-sectional studies.

**Note:** An Explanation and Elaboration article discusses each checklist item and gives methodological background and published examples of transparent reporting. The STROBE checklist is best used in conjunction with this article (freely available on the Web sites of PLoS Medicine at <http://www.plosmedicine.org/>, Annals of Internal Medicine at <http://www.annals.org/>, and Epidemiology at <http://www.epidem.com/>). Information on the STROBE Initiative is available at [www.strobe-statement.org](http://www.strobe-statement.org).

# BMJ Open

## Housing, neighbourhood and sociodemographic associations with adult levels of physical activity and adiposity: baseline findings from the ENABLE London Study

|                                 |                                                                                                                                                                                                                                                                                                                                                                                                                                                                                                                                                                                                                                                                                                                                                                                                                                                                                                                                                                                                                                                                                                                                                                                                                                                                                                                                                                                               |
|---------------------------------|-----------------------------------------------------------------------------------------------------------------------------------------------------------------------------------------------------------------------------------------------------------------------------------------------------------------------------------------------------------------------------------------------------------------------------------------------------------------------------------------------------------------------------------------------------------------------------------------------------------------------------------------------------------------------------------------------------------------------------------------------------------------------------------------------------------------------------------------------------------------------------------------------------------------------------------------------------------------------------------------------------------------------------------------------------------------------------------------------------------------------------------------------------------------------------------------------------------------------------------------------------------------------------------------------------------------------------------------------------------------------------------------------|
| Journal:                        | <i>BMJ Open</i>                                                                                                                                                                                                                                                                                                                                                                                                                                                                                                                                                                                                                                                                                                                                                                                                                                                                                                                                                                                                                                                                                                                                                                                                                                                                                                                                                                               |
| Manuscript ID                   | bmjopen-2017-021257.R1                                                                                                                                                                                                                                                                                                                                                                                                                                                                                                                                                                                                                                                                                                                                                                                                                                                                                                                                                                                                                                                                                                                                                                                                                                                                                                                                                                        |
| Article Type:                   | Research                                                                                                                                                                                                                                                                                                                                                                                                                                                                                                                                                                                                                                                                                                                                                                                                                                                                                                                                                                                                                                                                                                                                                                                                                                                                                                                                                                                      |
| Date Submitted by the Author:   | 16-May-2018                                                                                                                                                                                                                                                                                                                                                                                                                                                                                                                                                                                                                                                                                                                                                                                                                                                                                                                                                                                                                                                                                                                                                                                                                                                                                                                                                                                   |
| Complete List of Authors:       | Nightingale, C; St George's University London, Division of Population Health Sciences and Education<br>Rudnicka, Alicja; SGUL University of London<br>Ram, Bina; St George's, University of London, Population Health Research Institute<br>Shankar, Aparna; St. George's, University of London, Population Health Research Institute<br>Limb, Elizabeth; St George's University, Population Health Research Institute<br>Procter, Duncan; University of Bristol, Centre for Exercise, Nutrition and Health Sciences<br>Cooper, Ashley; University of Bristol,<br>Page, Angie; University of Bristol, Centre for Exercise, Nutrition and Health Sciences<br>Ellaway, Anne; University of Glasgow, MRC/SCO Social and Public Health Sciences Unit<br>Giles-Corti, Billie; RMIT University, NHMRC Centre of Research Excellence in Healthy Liveable Communities<br>Clary, Christelle; London School of Hygiene and Tropical Medicine, Social And Environmental Health Research<br>Lewis, Daniel; London School of Hygiene and Tropical Medicine,<br>Cummins, Steven; London School of Hygiene and Tropical Medicine, Department of Social and Environmental Health Research<br>Whincup, Peter; St Georges, University of London<br>Cook, Derek; St George's University, Division of Population Health Sciences<br>Owen, C; St George's, University London, Population Health Research Institute |
| <b>Primary Subject Heading</b>: | Epidemiology                                                                                                                                                                                                                                                                                                                                                                                                                                                                                                                                                                                                                                                                                                                                                                                                                                                                                                                                                                                                                                                                                                                                                                                                                                                                                                                                                                                  |
| Secondary Subject Heading:      | Cardiovascular medicine                                                                                                                                                                                                                                                                                                                                                                                                                                                                                                                                                                                                                                                                                                                                                                                                                                                                                                                                                                                                                                                                                                                                                                                                                                                                                                                                                                       |
| Keywords:                       | Physical activity, Adiposity, Housing, Perceived neighbourhood environment, ENABLE-London                                                                                                                                                                                                                                                                                                                                                                                                                                                                                                                                                                                                                                                                                                                                                                                                                                                                                                                                                                                                                                                                                                                                                                                                                                                                                                     |
|                                 |                                                                                                                                                                                                                                                                                                                                                                                                                                                                                                                                                                                                                                                                                                                                                                                                                                                                                                                                                                                                                                                                                                                                                                                                                                                                                                                                                                                               |

1  
2  
3  
4  
5  
6  
7  
8  
9  
10  
11  
12  
13  
14  
15  
16  
17  
18  
19  
20  
21  
22  
23  
24  
25  
26  
27  
28  
29  
30  
31  
32  
33  
34  
35  
36  
37  
38  
39  
40  
41  
42  
43  
44  
45  
46  
47  
48  
49  
50  
51  
52  
53  
54  
55  
56  
57  
58  
59  
60

SCHOLARONE™  
Manuscripts

For peer review only



1  
2  
3 **Housing, neighbourhood and sociodemographic associations with adult levels**  
4 **of physical activity and adiposity: baseline findings from the ENABLE London**  
5 **Study**  
6  
7

8 CM Nightingale<sup>1</sup>, AR Rudnicka<sup>1</sup>, B Ram<sup>1</sup>, A Shankar<sup>1</sup>, ES Limb<sup>1</sup>, D Procter<sup>2,3</sup>, AR Cooper<sup>2,3</sup>, AS  
9 Page<sup>2,3</sup>, A Ellaway<sup>4</sup>, B Giles-Corti<sup>5</sup>, C Clary<sup>6</sup>, D Lewis<sup>6</sup>, S Cummins<sup>6</sup>, PH Whincup<sup>1</sup>, DG Cook<sup>1</sup>,  
10 CG Owen<sup>1</sup>  
11  
12  
13  
14

15  
16 <sup>1</sup> Population Health Research Institute, St George's, University of London, London, UK.

17 <sup>2</sup> Centre for Exercise, Nutrition and Health Sciences, University of Bristol, Bristol, UK.

18  
19 <sup>3</sup> National Institute for Health Research Bristol Biomedical Research Centre, University  
20 Hospitals Bristol NHS Foundation Trust and University of Bristol, UK.

21  
22 <sup>4</sup> MRC/SCO Social and Public Health Sciences Unit, University of Glasgow, Glasgow, UK.

23  
24 <sup>5</sup> NHMRC Centre of Research Excellence in Healthy Liveable Communities, RMIT University,  
25 Melbourne, Australia.

26  
27 <sup>6</sup> London School of Hygiene and Tropical Medicine, London, UK.  
28  
29  
30

31 Corresponding Author:-

32 Dr Claire M Nightingale

33 Population Health Research Institute, St. George's, University of London, Cranmer Terrace,  
34 London SW17 0RE. Email: [cnightin@sgul.ac.uk](mailto:cnightin@sgul.ac.uk) Phone: +44 (0) 208 725 2342  
35  
36  
37

38  
39 **Total word count:** 4551 excluding abstract (311 words)

40 **Tables and figures:** 3 tables, 1 figure, 5 supplementary tables

41  
42 **References:** 53  
43  
44  
45  
46  
47  
48  
49  
50  
51  
52  
53  
54  
55  
56  
57  
58  
59  
60

## **Abstract**

**Objectives:** The neighbourhood environment is increasingly shown to be an important correlate of health. We assessed associations between housing tenure, neighbourhood perceptions, sociodemographic factors, and levels of physical activity (PA) and adiposity among adults seeking housing in East Village (formerly London 2012 Olympic/Paralympic Games Athletes' Village).

**Setting:** Cross-sectional analysis of adults seeking social, intermediate and market-rent housing in East Village.

**Participants:** 1278 participants took part in the study (58% female). Complete data on adiposity (body mass index [BMI] and fat mass %) were available for 1240 participants (97%); of these a sub-set of 1107 participants (89%) met the inclusion criteria for analyses of accelerometer-based measurements of PA. We examined associations between housing sector sought, neighbourhood perceptions (covariates) and PA and adiposity (dependent variables) adjusted for household clustering, sex, age group, ethnic group, and limiting longstanding illness.

**Results:** Participants seeking social housing had the fewest daily steps (8304, 95%CI 7959,8648) and highest BMI (26.0kg/m<sup>2</sup> 95%CI 25.5,26.5kg/m<sup>2</sup>) compared with those seeking intermediate (daily steps 9417, 95%CI 9106,9731; BMI 24.8kg/m<sup>2</sup> 95%CI 24.4,25.2kg/m<sup>2</sup>) or market-rent housing (daily steps 9313, 95%CI 8858,9768; BMI 24.6kg/m<sup>2</sup> 95%CI 24.0,25.2kg/m<sup>2</sup>). Those seeking social housing had lower levels of PA (by 19-42%) at weekends vs weekdays, compared with other housing groups. Positive perceptions of neighbourhood quality were associated with higher steps and lower BMI, with differences between social and intermediate groups reduced by ~10% following adjustment, equivalent to a reduction of 111 for steps and 0.5kg/m<sup>2</sup> for BMI.

1  
2  
3 **Conclusions:** The social housing group undertook less PA than other housing sectors, with  
4  
5 weekend PA offering the greatest scope for increasing PA, and tackling adiposity in this  
6  
7 group. Perceptions of neighbourhood quality were associated with PA and adiposity and  
8  
9 reduced differences in steps and BMI between housing sectors. Interventions to encourage  
10  
11 physical activity at weekends and improve neighbourhood quality, especially amongst the  
12  
13 most disadvantaged, may provide scope to reduce inequalities in health behaviour.  
14  
15

### 16 17 18 19 **Strengths and limitations of this study**

- 20  
21 • Large sample with representation of three different aspirational housing groups,  
22 providing a wide range of socioeconomic backgrounds
- 23  
24 • Objective measurements of physical activity and adiposity outcomes using  
25 accelerometry and bioelectrical impedance respectively
- 26  
27 • Lower number of participants studied seeking market-rent housing compared with  
28 those seeking intermediate or social housing  
29  
30  
31

### 32 33 **Keywords**

34  
35 Physical activity; Adiposity; Housing; Perceived neighbourhood environment; ENABLE-  
36  
37  
38 London  
39  
40  
41  
42  
43  
44  
45  
46  
47  
48  
49  
50  
51  
52  
53  
54  
55  
56  
57  
58  
59  
60

## ***Introduction***

Physical inactivity and adiposity are associated with an increased risk of type 2 diabetes and cardiovascular disease (1-4) and constitute a serious public health problem in the UK and globally (5). Evidence suggests that levels of physical activity (PA) are lower among those who are socioeconomically disadvantaged (6), who experience greater economic, access and health related barriers to being physically active (7). Socioeconomic status is also associated with differences in types of PA, in particular higher socioeconomic status is associated with more vigorous leisure time PA (8). Previous research has found variation in PA by day of the week with studies showing lower levels of activity on Sundays compared with weekdays in young adults (9), parents and their children (10).

There is emerging evidence suggesting that housing tenure is an important determinant of health. In particular, UK-based studies have shown that housing tenure (owner vs. private renter vs. public sector renter) is associated with illness and mortality (15;16). Amongst particular groups including those who are economically inactive or unemployed, housing tenure might provide a better indication of socioeconomic status compared with measures based on occupation or income (11). Indeed, in several studies housing tenure remained associated with health outcomes following adjustment for conventional measures of socioeconomic status such as income or education (12;13). A more nuanced approach is therefore required with respect to measures of socioeconomic status, and they should not be simply regarded as interchangeable (14;15). Despite this, there has been limited research examining the direct effect of housing tenure on PA, and existing evidence is equivocal.

Harrison and colleagues found no association between housing tenure and meeting recommended levels of PA among community dwelling healthy adults in the North-East of

1  
2  
3 England (16). Similarly housing tenure was not associated with self-reported energetic PA  
4  
5 among older Australians (17). Ogilvie and colleagues found overall levels of PA to be higher  
6  
7 among individuals living in social housing compared with owner-occupiers (18). The authors  
8  
9 suggest that may capture occupational PA levels which are likely to be higher among those  
10  
11 in social housing (18). In contrast, living in private rental accommodation was associated  
12  
13 with a greater likelihood of taking up exercise over a 9-year period among men aged 18-49  
14  
15 at baseline, compared with those in local authority accommodation (19).  
16  
17  
18  
19  
20

21 Housing tenure may affect health and health behaviours in part through characteristics of  
22  
23 the home or neighbourhood itself (20;21) or psychological factors such as self-efficacy or  
24  
25 self-esteem (22). Social housing estates which are common in the UK may be associated  
26  
27 with specific cultures and norms, which in turn shape residents' behaviours (13). Subjective  
28  
29 characteristics of the neighbourhood environment including higher perceived access to  
30  
31 recreational facilities and shops in local proximity have been shown to be associated with  
32  
33 higher levels of PA (23;24). Residents who perceive their neighbourhood more positively,  
34  
35 have been shown to have better mental health and are less likely to relocate (25).  
36  
37  
38

39 Conversely, real and perceived crime, has the potential to constrain residents' PA (26).  
40

41  
42 However, a recent systematic review suggested a lack of association between PA and  
43  
44 perceptions of safety from crime; highlighting the need for high quality evidence, including  
45  
46 prospective studies and natural experiments (27), to examine this issue further. In  
47  
48 particular, high quality evidence is needed to understand the potentially multifactorial  
49  
50 influence of residential location on health and health behaviours; effects which are likely to  
51  
52 extend beyond simple measures of socioeconomic status (27).  
53  
54  
55  
56  
57  
58  
59  
60

1  
2  
3 The Examining Neighbourhood Activities and Built Living Environments in London (ENABLE  
4  
5 London) study is a longitudinal study evaluating how active urban design influences the  
6  
7 health and wellbeing of people moving into the former Athletes' Village of the London 2012  
8  
9 Olympic and Paralympic Games now known as 'East Village' (28). East Village is a new high-  
10  
11 density neighbourhood development built on active design principles containing a mix of  
12  
13 social housing, intermediate (including affordable rent, shared ownership and shared  
14  
15 equity) housing, and market-rent housing. This paper draws on baseline data (prior to any  
16  
17 potential move to East Village) to first, examine predictors of PA and adiposity (measured  
18  
19 objectively using accelerometry and bioelectrical impedance), including the housing sector  
20  
21 to which they are applying and perceptions of their neighbourhood. Second, to examine  
22  
23 whether PA patterns across the week vary by housing sector and third, to examine whether  
24  
25 adjustment for perceptions of the neighbourhood environment reduce housing sector  
26  
27 differences in PA and adiposity.  
28  
29  
30  
31  
32  
33  
34

### 35 **Methods**

36  
37 Study participants were recruited from those seeking or who had applied for new  
38  
39 accommodation in East Village and were classified by the type of housing tenure sought  
40  
41 based on level of income; i.e. social, intermediate or market-rent. The inclusion criteria was  
42  
43 broad and included anyone interested / applying for single or multiple occupancy  
44  
45 accommodation in East Village. There was no explicit exclusion criteria; adults of any age,  
46  
47 gender, ethnic group, with or without handicap, were invited to participate. Current  
48  
49 housing status was strongly linked to aspirational housing status, where those seeking social  
50  
51 accommodation were currently in social housing or on social housing waiting lists, and those  
52  
53 seeking intermediate and market-rent accommodation were largely in privately rented  
54  
55  
56  
57  
58  
59  
60

1  
2  
3 housing. Recruitment of participants in the different housing sectors was carried out  
4  
5 between January 2013 and December 2015 in three phases determined by the order of  
6  
7 availability of housing in East Village (social, intermediate, and market-rent respectively).  
8  
9 Those applying for social housing in East Village were initially recruited between January  
10  
11 2013 and May 2014, households seeking intermediate accommodation between July 2013  
12  
13 and November 2014 and those seeking market rent accommodation between September  
14  
15 2014 and December 2015. Recruitment processes for those applying for social housing  
16  
17 were slightly different compared with other housing sectors. The East Thames Group  
18  
19 housing association was primarily responsible for recruiting participants in social housing,  
20  
21 whereas the ENABLE London team (in association with Triathlon Homes and Get Living  
22  
23 London) recruited participants from the other housing sectors (28). Aspirational housing  
24  
25 tenure is integral to the design of ENABLE London, and we have shown that this provides a  
26  
27 clear socioeconomic marker of study participants. For example, those seeking social housing  
28  
29 in East Village are more likely to be unemployed, less educated and more likely to represent  
30  
31 ethnic minorities (a classic marker of socioeconomic vulnerability), compared to those  
32  
33 seeking affordable and market-rent accommodation (29). We have also shown key  
34  
35 differences in mental health and well-being between housing groups, where those seeking  
36  
37 social housing were more likely to be depressed, anxious and have poorer well-being,  
38  
39 compared to other housing groups (30). Moreover, this is entirely consistent with earlier  
40  
41 studies which found that both current housing tenure and aspirational housing tenure are  
42  
43 associated with a variety of health outcomes, including mental health and measures of  
44  
45 general health (31;32).  
46  
47  
48  
49  
50  
51  
52  
53  
54  
55  
56  
57  
58  
59  
60

1  
2  
3 Baseline assessments of participants were carried out in their place of residence before any  
4  
5 potential move to East Village. Full details of the recruitment process can be found  
6  
7 elsewhere (28).  
8  
9

### 10 11 12 **Independent variables** 13

14 A team of trained fieldworkers administered self-complete questionnaires on a laptop  
15  
16 during home visits. Data on age, sex, self-defined ethnicity, work status, occupation and  
17  
18 whether the participant had a limiting longstanding illness or disability (lasting or expected  
19  
20 to last at least 12 months) were collected. Participants self-defined as 'White', 'Asian',  
21  
22 'Black', 'Mixed', or 'Other'; the latter two categories were combined for analyses.  
23  
24 Socioeconomic status based on occupation was coded using the National Statistics Social-  
25  
26 Economic Coding (NS-SEC) to categorise participants into 'higher managerial or professional  
27  
28 occupations', 'intermediate occupations', 'routine or manual' (33). An additional  
29  
30 'economically inactive' category included those seeking employment, unable to work due to  
31  
32 disability or illness, retired, looking after home and family, and students. We sought  
33  
34 information on educational attainment; participants were categorised into "Degree or  
35  
36 equivalent / Higher", "Intermediate qualifications" (including A levels and GCSEs), and  
37  
38 "Other / None" (including work-based or foreign qualifications). Participants completed  
39  
40 questionnaires assessing neighbourhood perceptions (30). Five items assessed perceived  
41  
42 crime (e.g., "There is a lot of crime in my neighbourhood"; Cronbach's  $\alpha = 0.87$ ) and six  
43  
44 items assessed neighbourhood quality (e.g. "This area is a place I enjoy living in"; Cronbach's  
45  
46  $\alpha = 0.78$ ). Responses on items were summed and scores ranged from -10 to +10 for  
47  
48 perceived crime and -12 to +12 for perceived quality, such that positive scores indicate less  
49  
50 perceived crime and better neighbourhood quality while negative scores indicate more  
51  
52  
53  
54  
55  
56  
57  
58  
59  
60



1  
2  
3 perceived crime and poorer quality. The scales were derived following an exploratory factor  
4  
5 analysis of 14 questions regarding neighbourhood (Supplementary Table 1).  
6  
7

### 8 9 **Dependent variables**

10  
11 Height was measured to the last complete millimetre using a portable stadiometer; weight  
12  
13 was measured to the nearest kilogram using a Tanita SC-240 Body Composition Analyzer  
14  
15 (Tanita, Tokyo, Japan); body mass index (BMI) was derived as  $\text{weight(kg)}/\text{height(m)}^2$ . The  
16  
17 Tanita SC-240 Body Composition Analyzer also measured leg-to-leg bioelectrical impedance  
18  
19 from which fat free mass and fat mass were estimated. Fat mass percentage was calculated  
20  
21 as fat mass (kg)/weight (kg)\*100.  
22  
23  
24  
25

26  
27  
28 Participants wore a hip-mounted ActiGraph GT3X+ accelerometer during waking hours over  
29  
30 a consecutive period of 7 days (ActiGraph LLC, Florida, USA). These accelerometers  
31  
32 provided daily measures of steps, counts and time spent in moderate and vigorous PA  
33  
34 (MVPA) using established cut-offs. Daily time spent in MVPA both overall and in  $\geq 10$  minute  
35  
36 bouts in accordance with UK recommendations for PA (34) were assessed. The cut-point for  
37  
38 moderate PA was defined as  $\geq 1952$  counts per minute (35). We excluded any days of  
39  
40 recording where the amount of registered time accumulated was below 540 minutes (36).  
41  
42  
43

44 Non-wear periods were defined as a minimum length of 60 minutes, allowing for a 2-minute  
45  
46 spike tolerance. Participants with at least one day of recording were retained in analyses.  
47

48 We fitted a multilevel linear model for each outcome to allow for repeated measurements  
49  
50 of daily PA, by fitting participant as a random effect and adjusting for day of the week, day  
51  
52 order of recording and month as fixed effects. Raw level one residuals were obtained from  
53  
54 the model and a within person average value of each outcome variable was obtained by  
55  
56  
57

1  
2  
3 averaging these raw residuals. The average of these raw residuals for each participant was  
4  
5 added to the sample mean for that particular PA variable to derive an unbiased average  
6  
7 level of each PA variable for each person.  
8  
9

### 10 11 12 **Statistical analysis**

13  
14 All analyses were carried out using STATA/SE software (Stata/SE 14 for Windows; StataCorp  
15  
16 LP, College Station, TX, USA). Outcome variables were inspected for normality and BMI was  
17  
18 log transformed due to its skewed distribution. Multilevel linear regression models were  
19  
20 fitted, mutually adjusted for housing sector and participant characteristics (sex, age group,  
21  
22 ethnic group, and limiting longstanding illness) as fixed effects, with a random effect to  
23  
24 allow for household clustering. Residuals did not show departure from linearity, suggesting  
25  
26 that the model assumptions were appropriate. Absolute differences or percentage  
27  
28 differences for log transformed outcomes (i.e. BMI) are presented by sex, age group, ethnic  
29  
30 group, limiting longstanding illness and housing sector. Sensitivity analyses examined  
31  
32 whether associations remained when the sample was restricted to 931 participants (84%)  
33  
34 with at least four days of 540 or more minutes per day of recording.  
35  
36  
37  
38  
39  
40

41  
42 To assess differences in PA by day of the week as opposed to overall levels of PA we took  
43  
44 the following approach. Daily PA data were examined using multilevel models with random  
45  
46 effects to allow for multiple days of recording within person and household clustering. An  
47  
48 interaction between housing sector and day of the week was fitted and models were  
49  
50 adjusted for sex, age group, ethnic group, limiting longstanding illness, day order of  
51  
52 recording and month of measurement as fixed effects.  
53  
54  
55  
56  
57  
58  
59  
60

1  
2  
3 The associations between neighbourhood perception scales and adiposity and PA outcomes  
4  
5 were examined. Each of the neighbourhood quality and crime scores were included in the  
6  
7 models as quintiles, to examine the differences in outcomes between the top and bottom  
8  
9 quintile. Finally, the effect of adjustment for neighbourhood perception on differences in  
10  
11 adiposity and PA between housing sectors was examined. If associations between outcomes  
12  
13 and neighbourhood perceptions appeared linear, models examining housing sector  
14  
15 differences were additionally adjusted for neighbourhood perceptions as a continuous  
16  
17 variable.  
18  
19  
20  
21  
22

### 23 **Patient and Public Involvement**

24  
25 The ENABLE London study was developed in partnership with a network of both local and  
26  
27 regional stakeholders identified through our collaborator links to agencies, involved with the  
28  
29 design, planning and management of large-scale accommodation developments. Locally  
30  
31 these included local authorities (particularly Newham) and a number of housing  
32  
33 associations, in particular Triathlon Homes, a partner organisation of housing associations,  
34  
35 which manages social and intermediate homes in East Village. Participants have been  
36  
37 involved in the study from an early stage to ensure assessments and participation remain  
38  
39 relevant and enjoyable, to ensure the continued significance and potential generalisability  
40  
41 of the work.  
42  
43  
44  
45  
46  
47  
48

### 49 **Results**

50  
51 Of 1819 households who agreed to be contacted by the study team in order to receive  
52  
53 further information about the ENABLE London study, 1278 adults from 1006 households  
54  
55 (55%) participated in the study and completed a questionnaire. Participation rates for those  
56  
57  
58  
59  
60

1  
2  
3 seeking market-rent and intermediate housing were 58% and 57% respectively and were  
4  
5 slightly lower in the social group (52%). Complete data on adiposity were available for 1240  
6  
7 participants (97%); of these a sub-set of 1107 participants (89%) met the inclusion criteria  
8  
9 for analyses of objectively measured PA. Participant characteristics (age, sex) and levels of  
10  
11 adiposity were similar among those who did and did not provide PA data; however,  
12  
13 participants from black and Asian ethnic groups were less likely to provide PA data.  
14  
15 Supplementary Table 2 shows participants characteristics at baseline for the 1240 adults  
16  
17 with measurements of adiposity at baseline. Those seeking social housing were more likely  
18  
19 to be female, of older age, of non-white ethnicity, to have limiting longstanding illness, and  
20  
21 to be in routine / manual occupations or economically inactive compared to those seeking  
22  
23 be in routine / manual occupations or economically inactive compared to those seeking  
24  
25 intermediate or market-rent housing.  
26  
27  
28  
29

30  
31 Adjusted mean levels of adiposity and PA outcomes by housing sector and participant  
32  
33 characteristics are shown in Supplementary Table 3. Table 1 shows housing sector and  
34  
35 other participant characteristics associations with BMI and fat mass %, and objectively  
36  
37 measured PA (steps, time spent in MVPA, time spent in MVPA in  $\geq 10$  minute bouts).  
38  
39 Participants seeking social housing had markedly higher levels of BMI and fat mass % and  
40  
41 markedly lower levels of steps, MVPA and MVPA in  $\geq 10$  minute bouts compared with those  
42  
43 seeking intermediate housing, though there were no differences between those seeking  
44  
45 market-rent and intermediate accommodation.  
46  
47  
48  
49

50  
51 Fat mass % was higher in females than males though there was no difference in BMI (Table  
52  
53 1). BMI and fat mass % were higher among all older age groups compared with 16-24 year  
54  
55 olds. Participants of black ethnicity had higher levels of BMI and fat mass % compared with  
56  
57  
58  
59

1  
2  
3 whites; there were no differences in BMI and fat mass % between Asian or other/mixed  
4  
5 ethnic groups and whites. Those with a limiting longstanding illness had higher levels of  
6  
7 both BMI and fat mass %. All PA measures were lower among females. Steps and MVPA  
8  
9 were slightly higher in 25-34 year olds and steps were also higher among 35-49 year olds  
10  
11 compared with 16-24 year olds; however, there were no age group differences for MVPA in  
12  
13  $\geq 10$  minute bouts. Participants of black and Asian ethnicities had lower levels of steps,  
14  
15 MVPA and MVPA in  $\geq 10$  minute bouts compared to whites. Participants who reported  
16  
17 having a limiting longstanding illness had lower levels of steps and MVPA, but not MVPA in  
18  
19  $\geq 10$  minute bouts. Educational attainment level was not associated with any of the  
20  
21 outcomes once housing sector had been adjusted for and adjustment for educational  
22  
23 attainment did not materially alter housing sector differences in adiposity or PA outcomes  
24  
25 (data available from authors).  
26  
27  
28  
29  
30  
31

32  
33 Sensitivity analyses for PA outcomes were carried out in 931 participants who wore an  
34  
35 ActiGraph for at least four days with at least 540 minutes of recording per day  
36  
37 (Supplementary Table 4). There were no differences between market-rent and  
38  
39 intermediate groups (consistent with the main analysis presented in Table 1). Differences  
40  
41 between social and intermediate groups were broadly similar with the results presented in  
42  
43 Table 1 for the main analysis.  
44  
45  
46  
47

48  
49 Differences in PA variables between housing groups were examined by day of the week to  
50  
51 explore whether differences between groups were consistent across the week (Figure 1A-  
52  
53 D). Levels of PA (steps (panel A), MVPA (panel B) and MVPA in  $\geq 10$  minute bouts (panel C))  
54  
55 were generally consistent across weekdays (Monday – Friday) among all groups. In the  
56  
57  
58  
59  
60

1  
2  
3 intermediate group, steps were higher on Saturdays and lower on Sundays; MVPA and  
4  
5 MVPA in  $\geq 10$  minute bouts were lower on Sundays but there was no difference on  
6  
7 Saturdays compared to weekday activity. In the market-rent group, steps, MVPA and MVPA  
8  
9 in  $\geq 10$  minute bouts were higher on Saturdays and similar to weekdays on Sundays. In the  
10  
11 social group, steps, MVPA and MVPA in  $\geq 10$  minute bouts were on average lower on  
12  
13 Saturdays and lower still on Sundays. Registered time (panel D) was lowest on average in  
14  
15 the social group during weekdays, decreasing on Saturdays and Sundays. The intermediate  
16  
17 and market-rent groups had higher levels of registered time during weekdays compared  
18  
19 with the social group which decreased on average on Saturdays and Sundays (despite  
20  
21 recording more steps and minutes in MVPA suggesting a higher intensity of activity). Mean  
22  
23 levels of steps, MVPA, and MVPA in  $\geq 10$  minute bouts on weekdays and differences on  
24  
25 Saturday and Sunday compared to weekdays are shown by housing sector in Supplementary  
26  
27 Table 5. The marked differences in activity between weekdays and weekend days in the  
28  
29 social group are not explained by differences in registered time (data available from  
30  
31 authors).

32  
33  
34  
35  
36  
37  
38  
39 Associations between perceived neighbourhood quality and crime scales and adiposity and  
40  
41 PA outcomes are shown in Table 2, adjusted for the participant characteristics shown in  
42  
43 Table 1. Participants with the most positive perceptions of neighbourhood quality (highest  
44  
45 quintile) had lower BMI, higher steps and recorded longer durations of MVPA compared  
46  
47 with those who had the most negative perceptions of neighbourhood quality (lowest  
48  
49 quintile). There were no significant associations between perceptions of neighbourhood  
50  
51 crime and adiposity or PA.  
52  
53  
54  
55  
56  
57  
58  
59  
60

1  
2  
3 The effect of adjustment for perceived neighbourhood quality on differences in adiposity  
4 and PA between housing sector groups is presented in Table 3. All associations between  
5 perceived neighbourhood quality and crime and outcome variables were approximately  
6 linear and were therefore fitted as continuous variables in the model. In addition,  
7 associations between perceived neighbourhood quality and crime and outcome variables  
8 were similar across the three housing groups (all  $p > 0.05$ ). Adjustment for perceptions of  
9 neighbourhood quality reduced differences in BMI, fat mass %, steps, MVPA and MVPA in  
10  $\geq 10$  minute bouts between the social and intermediate groups by 10%, 6%, 10%, 10% and  
11 7% respectively. Differences between market-rent and intermediate groups in adiposity and  
12 PA variables were not statistically significant before or after adjustment. A larger  
13 proportion of the social-intermediate group differences in steps, MVPA and MVPA in  $\geq 10$   
14 minute bouts on weekends was explained by adjustment for perceptions of neighbourhood  
15 quality (10%, 16% and 16% respectively) compared to the differences in steps, MVPA and  
16 MVPA in  $\geq 10$  minute bouts on weekdays which were reduced by 10%, 8% and 3%  
17 respectively (data not shown).  
18  
19  
20  
21  
22  
23  
24  
25  
26  
27  
28  
29  
30  
31  
32  
33  
34  
35  
36  
37  
38  
39

## 40 ***Discussion***

41  
42 The results of this study showed that participants seeking social housing in East Village had  
43 lower levels of PA and higher levels of BMI and fat mass % compared with those seeking  
44 intermediate and market-rent housing, even when adjusted for demographic factors. In the  
45 social housing group, levels of PA were particularly low on weekends compared with  
46 weekdays possibly reflecting higher occupational PA and lower leisure time PA; weekday-  
47 weekend differences in PA were less marked among those seeking intermediate and  
48 market-rent housing. However, the lower registered time at weekends but higher MVPA  
49  
50  
51  
52  
53  
54  
55  
56  
57  
58  
59  
60

1  
2  
3 and steps suggests more intense activity at weekends in the intermediate and market-rent  
4  
5 housing groups. These findings may inform targeted interventions to increase PA and  
6  
7 reduce adiposity in different socioeconomic groups.  
8  
9

10  
11  
12 Positive associations between perceived neighbourhood quality and PA, BMI and fat mass %  
13  
14 were also shown. Adjustment for differences in perceived neighbourhood quality reduced  
15  
16 differences in PA and BMI by approximately 10% between social and intermediate housing  
17  
18 groups; equivalent to a reduction of 111 for daily steps, 0.5 minutes for MVPA and 0.5kg/m<sup>2</sup>  
19  
20 for BMI. However, a larger proportion of the difference in PA was apparent at weekends;  
21  
22 equivalent to a reduction of 222 for daily steps and 2.2 minutes for MVPA.  
23  
24  
25  
26  
27

### 28 **Relation to previous studies**

29  
30 Studies have shown that lower socioeconomic status is associated with lower levels of PA  
31  
32 (37;38), and that those from more socially deprived backgrounds have the most barriers to  
33  
34 being physically active (7). Previous research examining the role of housing tenure is limited.  
35  
36 Findings from this study showed marked differences in PA and adiposity between those  
37  
38 seeking social, intermediate and market-rent housing. In particular, lower PA and higher  
39  
40 adiposity in participants seeking social housing, a group which comprises a high proportion  
41  
42 of people from more socioeconomically disadvantaged backgrounds (28). The higher levels  
43  
44 of BMI and fat mass % in those seeking social housing compared with those seeking  
45  
46 intermediate or market-rent housing is consistent with systematic reviews which have  
47  
48 found an association between lower socioeconomic status and higher levels of adiposity,  
49  
50 particularly in higher income countries and among women (39). While socioeconomic  
51  
52 status is a strong determinant of housing status, to our knowledge this is the first study to  
53  
54  
55  
56  
57  
58  
59  
60



1  
2  
3 explicitly examine housing sector differences in objective PA and markers of adiposity levels  
4  
5 (i.e. BMI and fat mass %). However, it is important to consider more broadly what these  
6  
7 aspirational housing sector differences might represent. Related studies have shown that  
8  
9 those in social housing are less likely to use active travel compared with owner occupiers  
10  
11 (18), and that those in social housing and home owners with a mortgage are more likely to  
12  
13 be obese and have higher levels of illness and disability compared to outright home owners,  
14  
15 even after adjustment for other socioeconomic status markers (40). These latter findings  
16  
17 suggest that the effect of home ownership may be more complex and cannot be simply  
18  
19 explained by socioeconomic status. Neighbourhood quality may offer a potential partial  
20  
21 explanation for these findings (41). In the present study perceptions of better  
22  
23 neighbourhood quality were associated with PA whereas perceptions of crime were not. In  
24  
25 contrast, a large UK-based study found that perceptions of feeling safe in the  
26  
27 neighbourhood had the largest effect on levels of PA compared with perceptions of leisure  
28  
29 facilities, sense of belonging or access to public transport or amenities (42). Another study  
30  
31 in the US found that low perceived safety from crime was associated with lower levels of  
32  
33 MVPA (43). However, a recent review concluded that higher quality evidence is needed,  
34  
35 including prospective studies and natural experiments in areas of wide crime variability, in  
36  
37 order to further understand the effect of crime on physical and mental health (27).  
38  
39 Moreover, previous work has suggested that objective and perceived measures of the built  
40  
41 environment correlate differently with physical activity levels, suggesting that these  
42  
43 measures are assessing different dimensions of the built environment which relate  
44  
45 differently to health behaviour (44).  
46  
47  
48  
49  
50  
51  
52  
53  
54  
55  
56  
57  
58  
59  
60

1  
2  
3 Our findings showed that PA levels were particularly low on the weekend among those  
4 seeking social housing, which is consistent with findings from a systematic review which  
5 found that leisure-time PA (which may be more likely to occur on weekends) was lower  
6 amongst those from lower socioeconomic groups (8). This suggests that low-cost strategies  
7 to increase weekend PA may be particularly beneficial to more disadvantaged households.  
8  
9 A free community-based program in Bogata Colombia, temporarily closed streets on  
10 Sundays to encourage PA amongst more disadvantaged local residents (45). A similar  
11 program has been trialled in the United States (46), however the effectiveness, longevity  
12 and generalisability of these programs to other socioeconomically deprived areas is yet to  
13 be established.  
14  
15  
16  
17  
18  
19  
20  
21  
22  
23  
24  
25  
26  
27

### 28 **Strengths and limitations**

29  
30 Strengths of this study include the representation of three different aspirational housing  
31 groups which provides a wide range of socioeconomic backgrounds. Of those seeking social  
32 housing, two-thirds (67%) were currently living in social housing accommodation provided  
33 by the local authority or housing association; the remainder were largely currently living in  
34 privately rented accommodation with many on social housing waiting lists. Of those seeking  
35 intermediate or market-rent accommodation, almost two-thirds were living in privately  
36 rented accommodation (both 64%); the remainder were largely living with relatives or  
37 friends. The study sample is large with good representation from a 'hard to reach' group of  
38 social housing participants. Participation rates were high given the target group, with  
39 between 50-60% of those who initially agreed to be contacted taking part in the study. The  
40 ActiGraph GT3X+ accelerometer provided validated objective measures of PA (47) and the  
41 use of bioelectrical impedance to provide more direct measurements of adiposity including  
42  
43  
44  
45  
46  
47  
48  
49  
50  
51  
52  
53  
54  
55  
56  
57  
58  
59  
60

1  
2  
3 fat mass %, which may provide a more valid marker of adiposity than BMI, particularly in a  
4  
5 multi-ethnic population (48;49). Reassuringly the patterns of PA by sex, ethnic group and  
6  
7 health status were consistent with those published previously (50-52). A limitation of the  
8  
9 study is the lower number of participants in the market-rent sector compared with the  
10  
11 other groups. This was due to restrictions imposed on the study team on the extent and  
12  
13 duration of access to potential applicants seeking market-rent accommodation. While the  
14  
15 study is longitudinal, these analyses are cross-sectional limiting the degree to which causal  
16  
17 inferences can be made. Moreover, there is the possibility of selection amongst study  
18  
19 participants, where those who are more active seek to move to East Village, may be more  
20  
21 likely to participate in the study and may perceive their environment differently, which may  
22  
23 limit the generalisability of the findings to neighbourhoods outside of East London.  
24  
25  
26  
27  
28  
29

### 30 **Conclusions and future work**

31  
32 The findings presented in this paper suggest that perceived neighbourhood quality is  
33  
34 associated with meaningful differences in PA and markers of adiposity. Differences in steps  
35  
36 (680 steps) and BMI ( $3.6\text{kg/m}^2$ ) between the lowest and highest quintiles of perceived  
37  
38 neighbourhood quality should be considered in the context of an average 10,000 steps per  
39  
40 day, where a 5% increase (500 steps) would be a worthwhile population level increase and a  
41  
42  $5\text{kg/m}^2$  increase in BMI is associated with a 31% increase in all-cause mortality (53). Hence,  
43  
44 improvements in neighbourhood quality could be associated with health benefits of public  
45  
46 health importance. There were also substantial differences in PA, BMI and fat mass %  
47  
48 between the three housing groups studied. In particular the very low levels of PA in the  
49  
50 social housing group during the weekend could provide a target for intervention to increase  
51  
52 levels of PA; again these differences should be considered in relation to 500 steps per day,  
53  
54  
55  
56  
57  
58  
59  
60

1  
2  
3 which can be considered as an increase of population importance. Perceptions of  
4  
5 neighbourhood quality reduced differences in PA and adiposity between housing sector  
6  
7 groups, and the possibility of measuring more objective markers of neighbourhood quality  
8  
9 within this study has the potential to explain more (44). The future follow-up of the ENABLE  
10  
11 London cohort will allow us to examine whether moving to 'East Village', a neighbourhood  
12  
13 designed for healthy active living, will have a positive impact on PA and/or adiposity levels.  
14  
15 A major aim of the study is to identify features of the local built environment that increase  
16  
17 levels of PA which could potentially help to reduce socioeconomic inequalities in health. It  
18  
19 will be of particular interest to determine whether an increase in PA is more apparent in the  
20  
21 social housing group whose neighbourhood characteristics should improve. Furthermore,  
22  
23 we will be in a position to examine whether any potential effects of the built environment  
24  
25 on PA are modified by housing sector type.  
26  
27  
28  
29  
30  
31  
32  
33  
34  
35  
36  
37  
38  
39  
40  
41  
42  
43  
44  
45  
46  
47  
48  
49  
50  
51  
52  
53  
54  
55  
56  
57  
58  
59  
60

### Ethical approval

Full ethical approval was obtained from the relevant Multi-Centre Research Ethics Committee (REC Reference 12/LO/1031). All participants provided written informed consent.

### Data sharing statement

Further details of the ENABLE London study are available from the study website (<http://www.enable.sgul.ac.uk/>). The ongoing collection and management of data has been made possible through grant funding from the Medical Research Council and the National Institute of Health Research. We welcome proposals for collaborative projects. For general data sharing inquiries, contact Professor Owen ([cowen@sgul.ac.uk](mailto:cowen@sgul.ac.uk)).

### Competing interests

We declare that we have no competing interests.

### Funding

This research is being supported by project grants from the Medical Research Council National Prevention Research Initiative (MR/J000345/1) and National Institute for Health Research (12/211/69). Diabetes and obesity prevention research at St George's, University of London is supported by the National Institute for Health Research (NIHR) Collaboration for Leadership in Applied Health Research and Care (CLAHRC) South London. AE is funded by the UK Medical Research Council as part of the Neighbourhoods and Communities Programme (MC\_UU\_12017-10). BG-C is supported by an NHMRC Principal Research Fellowship (#1107672). ARC and ASP are supported by NIHR Biomedical Research Centre at

1  
2  
3 University Hospitals Bristol NHS Foundation Trust and the University of Bristol. The views  
4  
5 expressed in this publication are those of the author(s) and not necessarily those of the  
6  
7 NHS, the National Institute for Health Research or the Department of Health.  
8

#### 9 10 Authorship statement

11  
12 CGO, ARR, AE, ARC, DL, SC, BG-C, DGC and PHW designed the study and raised funding. BR,  
13  
14 ARR, CC, DP and CGO collected data for the study; BR, ARR and CGO enrolled participants.  
15  
16 CMN, BR, ESL, ARR, CC, DP and CGO undertook data management. CMN, ESL analysed the  
17  
18 data; CMN wrote the first draft of the report. ARR, BR, ESL, AS, DP, ARC, ASP, AE, BG-C, CC,  
19  
20 DL, SC, PHW, DGC and CGO critically appraised the manuscript and approved the final draft.  
21  
22 CGO is responsible for data integrity.  
23  
24  
25  
26  
27

#### 28 Acknowledgements

29  
30 The authors thank the East Thames Group, Triathlon Homes and Get Living London who  
31  
32 have assisted in recruiting participants into the ENABLE London study. The ENABLE London  
33  
34 study is advised by a Steering Committee chaired by Professor Hazel Inskip (University of  
35  
36 Southampton), with Dr David Ogilvie (University of Cambridge) and Professor Andy Jones  
37  
38 (University of East Anglia) as academic advisors and Mrs Kate Worley (formerly East Thames  
39  
40 Group Assistant Director for Strategic Housing) as the lay/stakeholder member. The authors  
41  
42 are grateful to the members of the ENABLE London study team (in particular Aine Hogan,  
43  
44 Katrin Peuker, Cathy McKay) and to participating households, without whom this study  
45  
46  
47  
48  
49 would not be possible.  
50  
51  
52  
53  
54  
55  
56  
57  
58  
59  
60

## Reference List

1. Ford ES, Williamson DF, Liu S. Weight change and diabetes incidence: findings from a national cohort of US adults. *Am J Epidemiol* 1997;146:214-22.
2. Nocon M, Hiemann T, Muller-Riemenschneider F, Thalau F, Roll S, Willich SN. Association of physical activity with all-cause and cardiovascular mortality: a systematic review and meta-analysis. *Eur J Cardiovasc Prev Rehabil* 2008;15:239-46.
3. Shaper AG, Wannamethee SG, Walker M. Body weight: implications for the prevention of coronary heart disease, stroke, and diabetes mellitus in a cohort study of middle aged men. *BMJ* 1997;314:1311-7.
4. Whitlock G, Lewington S, Sherliker P, Clarke R, Emberson J, Halsey J, Qizilbash N, Collins R, Peto R. Body-mass index and cause-specific mortality in 900 000 adults: collaborative analyses of 57 prospective studies. *Lancet* 2009;373:1083-96.
5. Lim SS, Vos T, Flaxman AD, Danaei G, Shibuya K, Adair-Rohani H, Amann M, Anderson HR, Andrews KG, Aryee M et al. A comparative risk assessment of burden of disease and injury attributable to 67 risk factors and risk factor clusters in 21 regions, 1990-2010: a systematic analysis for the Global Burden of Disease Study 2010. *Lancet* 2012;380:2224-60.
6. Health Survey for England. Health Survey for England 2012: Health, social care and lifestyles. Craig, R. and Mindell, J. 2013. The Information Centre.
7. Chinn DJ, White M, Harland J, Drinkwater C, Raybould S. Barriers to physical activity and socioeconomic position: implications for health promotion. *J Epidemiol Community Health* 1999;53:191-2.
8. Beenackers MA, Kamphuis CB, Giskes K, Brug J, Kunst AE, Burdorf A, van Lenthe FJ. Socioeconomic inequalities in occupational, leisure-time, and transport related physical activity among European adults: a systematic review. *Int J Behav Nutr Phys Act* 2012;9:116.
9. McVeigh JA, Winkler EA, Howie EK, Tremblay MS, Smith A, Abbott RA, Eastwood PR, Healy GN, Straker LM. Objectively measured patterns of sedentary time and physical activity in young adults of the Raine study cohort. *Int J Behav Nutr Phys Act* 2016;13:41.
10. Sigmundova D, Sigmund E, Vokacova J, Kopkova J. Parent-child associations in pedometer-determined physical activity and sedentary behaviour on weekdays and weekends in random samples of families in the Czech Republic. *Int J Environ Res Public Health* 2014;11:7163-81.
11. Smith GD, Egger M. Socioeconomic differences in mortality in Britain and the United States. *Am J Public Health* 1992;82:1079-81.
12. Dalstra JA, Kunst AE, Mackenbach JP. A comparative appraisal of the relationship of education, income and housing tenure with less than good health among the elderly in Europe. *Soc Sci Med* 2006;62:2046-60.
13. Ellaway A, Macdonald L, Kearns A. Are housing tenure and car access still associated with health? A repeat cross-sectional study of UK adults over a 13-year period. *BMJ Open* 2016;6:e012268.

14. Macintyre S, Hiscock R, Kearns A, Ellaway A. Housing tenure and car access: further exploration of the nature of their relations with health in a UK setting. *J Epidemiol Community Health* 2001;55:330-1.
15. Macintyre S, McKay L, Der G, Hiscock R. Socio-economic position and health: what you observe depends on how you measure it. *J Public Health Med* 2003;25:288-94.
16. Harrison RA, McElduff P, Edwards R. Planning to win: Health and lifestyles associated with physical activity amongst 15,423 adults. *Public Health* 2006;120:206-12.
17. Kendig H, Browning C, Teshuva K. Health actions and social class among older Australians. *Aust N Z J Public Health* 1998;22:808-13.
18. Ogilvie D, Mitchell R, Mutrie N, Petticrew M, Platt S. Personal and environmental correlates of active travel and physical activity in a deprived urban population. *Int J Behav Nutr Phys Act* 2008;5:43.
19. Boniface DR, Cottee MJ, Neal D, Skinner A. Social and demographic factors predictive of change over seven years in CHD-related behaviours in men aged 18-49 years. *Public Health* 2001;115:246-52.
20. Macintyre S, Ellaway A, Hiscock R, Kearns A, Der G, McKay L. What features of the home and the area might help to explain observed relationships between housing tenure and health? Evidence from the west of Scotland. *Health Place* 2003;9:207-18.
21. Ellaway A, Macintyre S. Does housing tenure predict health in the UK because it exposes people to different levels of housing related hazards in the home or its surroundings? *Health Place* 1998;4:141-50.
22. Macintyre S, Ellaway A, Der G, Ford G, Hunt K. Do housing tenure and car access predict health because they are simply markers of income or self esteem? A Scottish study. *J Epidemiol Community Health* 1998;52:657-64.
23. Hoehner CM, Brennan Ramirez LK, Elliott MB, Handy SL, Brownson RC. Perceived and objective environmental measures and physical activity among urban adults. *Am J Prev Med* 2005;28:105-16.
24. Sallis JF, Bowles HR, Bauman A, Ainsworth BE, Bull FC, Craig CL, Sjostrom M, De B, I, Lefevre J, Matsudo V et al. Neighborhood environments and physical activity among adults in 11 countries. *Am J Prev Med* 2009;36:484-90.
25. Giles-Corti, B, Ryan, K, and Foster, S. Increasing density in Australia: Maximising the benefits and minimising the harm. 2012. National Heart Foundation of Australia. 16-8-2017.
26. Foster S, Giles-Corti B. The built environment, neighborhood crime and constrained physical activity: an exploration of inconsistent findings. *Prev Med* 2008;47:241-51.
27. da Silva IC, Payne VL, Hino AA, Varela AR, Reis RS, Ekelund U, Hallal PC. Physical Activity and Safety From Crime Among Adults: A Systematic Review. *J Phys Act Health* 2016;13:663-70.
28. Ram B, Nightingale CM, Hudda MT, Kapetanakis VV, Ellaway A, Cooper AR, Page A, Lewis D, Cummins S, Giles-Corti B et al. Cohort profile: Examining Neighbourhood Activities in Built



- 1  
2  
3 Living Environments in London: the ENABLE London-Olympic Park cohort. *BMJ Open*  
4 2016;6:e012643.
- 5  
6 29. Ram B, Nightingale CM, Hudda MT, Kapetanakis VV, Ellaway A, Cooper AR, Page A, Lewis D,  
7 Cummins S, Giles-Corti B et al. Cohort profile: Examining Neighbourhood Activities in Built  
8 Living Environments in London: the ENABLE London-Olympic Park cohort. *BMJ Open*  
9 2016;6:e012643.
- 10  
11 30. Ram B, Shankar A, Nightingale CM, Giles-Corti B, Ellaway A, Cooper AR, Page A, Cummins S,  
12 Lewis D, Whincup PH et al. Comparisons of depression, anxiety, well-being, and perceptions of  
13 the built environment amongst adults seeking social, intermediate and market-rent  
14 accommodation in the former London Olympic Athletes' Village. *Health Place* 2017;48:31-9.
- 15  
16 31. Macintyre S, Ellaway A, Hiscock R, Kearns A, Der G, McKay L. What features of the home and  
17 the area might help to explain observed relationships between housing tenure and health?  
18 Evidence from the west of Scotland. *Health Place* 2003;9:207-18.
- 19  
20 32. Mason KE, Baker E, Blakely T, Bentley RJ. Housing affordability and mental health: does the  
21 relationship differ for renters and home purchasers? *Soc Sci Med* 2013;94:91-7.
- 22  
23 33. Office for National Statistics. The National Statistics Socio-economic Classification User  
24 Manual. 2005.
- 25  
26 34. Department of Health. Start active, stay active: a report on physical activity from the four  
27 home countries Chief Medical Officers. 2011. Department of Health.
- 28  
29 35. Freedson PS, Melanson E, Sirard J. Calibration of the Computer Science and Applications, Inc.  
30 accelerometer. *Med Sci Sports Exerc* 1998;30:777-81.
- 31  
32 36. Harris T, Kerry SM, Limb ES, Victor CR, Iliffe S, Ussher M, Whincup PH, Ekelund U, Fox-Rushby J,  
33 Furness C et al. Effect of a Primary Care Walking Intervention with and without Nurse Support  
34 on Physical Activity Levels in 45- to 75-Year-Olds: The Pedometer And Consultation Evaluation  
35 (PACE-UP) Cluster Randomised Clinical Trial. *PLoS Med* 2017;14:e1002210.
- 36  
37 37. Allen MS, Vella SA. Longitudinal determinants of walking, moderate, and vigorous physical  
38 activity in Australian adults. *Prev Med* 2015;78:101-4.
- 39  
40 38. Juneau CE, Sullivan A, Dodgeon B, Cote S, Ploubidis GB, Potvin L. Social class across the life  
41 course and physical activity at age 34 years in the 1970 British birth cohort. *Ann Epidemiol*  
42 2014;24:641-7, 647.
- 43  
44 39. McLaren L. Socioeconomic status and obesity. *Epidemiol Rev* 2007;29:29-48.
- 45  
46 40. Tranter B, Donoghue J. Housing tenure, body mass index and health in Australia. *International*  
47 *Journal of Housing Policy* 2016;1:1-20.
- 48  
49 41. Turrell G, Haynes M, Wilson LA, Giles-Corti B. Can the built environment reduce health  
50 inequalities? A study of neighbourhood socioeconomic disadvantage and walking for  
51 transport. *Health Place* 2013;19:89-98.
- 52  
53 42. Harrison RA, Gemmell I, Heller RF. The population effect of crime and neighbourhood on  
54 physical activity: an analysis of 15,461 adults. *J Epidemiol Community Health* 2007;61:34-9.
- 55  
56  
57  
58  
59  
60

- 1
- 2
- 3
- 4 43. Brown BB, Werner CM, Smith KR, Tribby CP, Miller HJ. Physical activity mediates the
- 5 relationship between perceived crime safety and obesity. *Prev Med* 2014;66:140-4.
- 6
- 7 44. McGinn AP, Evenson KR, Herring AH, Huston SL, Rodriguez DA. Exploring associations between
- 8 physical activity and perceived and objective measures of the built environment. *J Urban*
- 9 *Health* 2007;84:162-84.
- 10
- 11 45. Sarmiento O, Torres A, Jacoby E, Pratt M, Schmid TL, Stierling G. The Ciclovía-Recreativa: A
- 12 mass-recreational program with public health potential. *J Phys Act Health* 2010;7 Suppl
- 13 2:S163-S180.
- 14
- 15 46. Hipp JA, Eyster AA, Zieff SG, Samuelson MA. Taking physical activity to the streets: the
- 16 popularity of Ciclovía and Open Streets initiatives in the United States. *Am J Health Promot*
- 17 2014;28:S114-S115.
- 18
- 19 47. Santos-Lozano A, Santin-Medeiros F, Cardon G, Torres-Luque G, Bailon R, Bergmeir C, Ruiz JR,
- 20 Lucia A, Garatachea N. Actigraph GT3X: validation and determination of physical activity
- 21 intensity cut points. *Int J Sports Med* 2013;34:975-82.
- 22
- 23 48. Deurenberg P, Yap M, van Staveren WA. Body mass index and percent body fat: a meta
- 24 analysis among different ethnic groups. *Int J Obes Relat Metab Disord* 1998;22:1164-71.
- 25
- 26 49. Gallagher D, Visser M, Sepulveda D, Pierson RN, Harris T, Heymsfield SB. How useful is body
- 27 mass index for comparison of body fatness across age, sex, and ethnic groups? *Am J Epidemiol*
- 28 1996;143:228-39.
- 29
- 30 50. Hayes L, White M, Unwin N, Bhopal R, Fischbacher C, Harland J, Alberti KG. Patterns of physical
- 31 activity and relationship with risk markers for cardiovascular disease and diabetes in Indian,
- 32 Pakistani, Bangladeshi and European adults in a UK population. *J Public Health Med*
- 33 2002;24:170-8.
- 34
- 35 51. Health and Social Care Information Centre. Health Survey for England 2004: The health of
- 36 ethnic minority groups. Sproston, K. and Mindell, J. 2006. The Information Centre.
- 37
- 38 52. Health and Social Care Information Centre. Health Survey for England - 2008: Physical activity
- 39 and fitness. Craig R, Mindell J, and Hirani V. 2009. NHS Digital.
- 40
- 41 53. Global BMI MC, Di AE, Bhupathiraju S, Wormser D, Gao P, Kaptoge S, Berrington de GA, Cairns
- 42 BJ, Huxley R, Jackson C et al. Body-mass index and all-cause mortality: individual-participant-
- 43 data meta-analysis of 239 prospective studies in four continents. *Lancet* 2016;388:776-86.
- 44
- 45
- 46
- 47
- 48
- 49
- 50
- 51
- 52
- 53
- 54
- 55
- 56
- 57
- 58
- 59
- 60

Table 1: Associations between adiposity and physical activity outcomes and patient characteristics

|                           |      | Difference or % difference* in adiposity/physical activity (95% CI), p-value |              |         |            |              |         |              |               |         |                              |               |         |                                                  |               |         |
|---------------------------|------|------------------------------------------------------------------------------|--------------|---------|------------|--------------|---------|--------------|---------------|---------|------------------------------|---------------|---------|--------------------------------------------------|---------------|---------|
| n                         |      | BMI (kg/m <sup>2</sup> )*                                                    |              |         | Fat mass % |              |         | Daily steps† |               |         | Daily minutes spent in MVPA† |               |         | Daily minutes spent in MVPA in ≥10 minute bouts† |               |         |
| <b>Sex</b>                |      |                                                                              |              |         |            |              |         |              |               |         |                              |               |         |                                                  |               |         |
| Male (Ref)                | 522  | -                                                                            | -            | -       | -          | -            | -       | -            | -             | -       | -                            | -             | -       | -                                                | -             |         |
| Female                    | 718  | -1.2                                                                         | (-3.2, 0.9)  | 0.26    | 11.1       | (10.3, 12.0) | <0.0001 | -570         | (-946, -194)  | 0.003   | -9.3                         | (-12.2, -6.4) | <0.0001 | -4.1                                             | (-6.1, -2.0)  | <0.001  |
| <b>Age group</b>          |      |                                                                              |              |         |            |              |         |              |               |         |                              |               |         |                                                  |               |         |
| Age 16-24 (Ref)           | 269  | -                                                                            | -            | -       | -          | -            | -       | -            | -             | -       | -                            | -             | -       | -                                                | -             |         |
| Age 25-34                 | 531  | 6.3                                                                          | (3.5, 9.1)   | <0.0001 | 3.2        | (2.1, 4.3)   | <0.0001 | 502          | (11, 992)     | 0.04    | 4.0                          | (0.2, 7.9)    | 0.04    | 1.0                                              | (-1.9, 3.8)   | 0.51    |
| Age 35-49                 | 358  | 13.4                                                                         | (10.2, 16.6) | <0.0001 | 6.4        | (5.2, 7.6)   | <0.0001 | 699          | (173, 1224)   | 0.01    | 3.9                          | (-0.2, 8.0)   | 0.07    | -1.1                                             | (-4.0, 1.8)   | 0.46    |
| Age 50+                   | 82   | 17.6                                                                         | (12.6, 22.9) | <0.0001 | 9.2        | (7.3, 11.0)  | <0.0001 | -9           | (-832, 813)   | 0.98    | -6.0                         | (-12.4, 0.5)  | 0.07    | -2.0                                             | (-6.8, 2.7)   | 0.40    |
| <b>Ethnic group</b>       |      |                                                                              |              |         |            |              |         |              |               |         |                              |               |         |                                                  |               |         |
| White (Ref)               | 595  | -                                                                            | -            | -       | -          | -            | -       | -            | -             | -       | -                            | -             | -       | -                                                | -             |         |
| Black                     | 314  | 6.2                                                                          | (3.3, 9.3)   | <0.0001 | 3.6        | (2.4, 4.8)   | <0.0001 | -1116        | (-1657, -575) | <0.0001 | -7.4                         | (-11.7, -3.2) | <0.001  | -6.6                                             | (-9.8, -3.4)  | <0.0001 |
| Asian                     | 210  | -0.3                                                                         | (-3.1, 2.7)  | 0.85    | 0.02       | (-1.2, 1.3)  | 0.97    | -1409        | (-1972, -845) | <0.0001 | -11.5                        | (-15.9, -7.0) | <0.0001 | -8.1                                             | (-11.4, -4.8) | <0.0001 |
| Other/Mixed               | 121  | 1.3                                                                          | (-2.3, 5.0)  | 0.48    | 1.0        | (-0.5, 2.5)  | 0.18    | -430         | (-1100, 239)  | 0.21    | -4.6                         | (-9.8, 0.7)   | 0.09    | -4.0                                             | (-7.9, -0.04) | 0.05    |
| <b>Limiting illness</b>   |      |                                                                              |              |         |            |              |         |              |               |         |                              |               |         |                                                  |               |         |
| No (Ref)                  | 1087 | -                                                                            | -            | -       | -          | -            | -       | -            | -             | -       | -                            | -             | -       | -                                                | -             |         |
| Yes                       | 153  | 4.3                                                                          | (1.1, 7.5)   | 0.01    | 1.6        | (0.3, 2.9)   | 0.01    | -1081        | (-1666, -496) | <0.001  | -5.7                         | (-10.3, -1.1) | 0.01    | -2.8                                             | (-6.1, 0.5)   | 0.10    |
| <b>Housing sector</b>     |      |                                                                              |              |         |            |              |         |              |               |         |                              |               |         |                                                  |               |         |
| Social Intermediate (Ref) | 503  | -                                                                            | -            | -       | -          | -            | -       | -            | -             | -       | -                            | -             | -       | -                                                | -             |         |
| Market-rent               | 225  | -0.8                                                                         | (-3.6, 2.0)  | 0.57    | -0.2       | (-1.4, 1.0)  | 0.70    | -104         | (-633, 424)   | 0.70    | 2.3                          | (-1.9, 6.4)   | 0.29    | 2.8                                              | (-0.3, 6.0)   | 0.08    |

\* Percentage differences are presented for BMI, which was log-transformed for analysis

All differences and % differences are mutually adjusted for sex, age group, ethnic group, limiting longstanding illness, housing sector and a random effect to allow for clustering at household level

† Missing data for 133 participants

MVPA and MVPA in ≥10 minute bouts are an average daily estimate, obtained from averaging a participant's weekly total.

Table 2: Associations between adiposity and physical activity outcomes and neighbourhood perceptions scales

|                                          | Difference or % difference* in outcome between the highest and lowest quintiles for each neighbourhood scale (95% CI), p-value |              |      |                         |             |      |
|------------------------------------------|--------------------------------------------------------------------------------------------------------------------------------|--------------|------|-------------------------|-------------|------|
|                                          | Perceptions of NH quality                                                                                                      |              |      | Perceptions of NH crime |             |      |
| <b>Adiposity (N = 1240)</b>              |                                                                                                                                |              |      |                         |             |      |
| Body mass index (kg/m <sup>2</sup> )*    | -3.6                                                                                                                           | (-6.5, -0.6) | 0.02 | -2.1                    | (-5.4, 1.3) | 0.21 |
| Fat mass %                               | -1.2                                                                                                                           | (-2.5, 0.06) | 0.06 | -0.8                    | (-2.2, 0.7) | 0.30 |
| <b>Physical activity (N = 1107)</b>      |                                                                                                                                |              |      |                         |             |      |
| Daily steps                              | 677                                                                                                                            | (108, 1247)  | 0.02 | -63                     | (-713, 587) | 0.85 |
| Daily MVPA (minutes)                     | 4.5                                                                                                                            | (0.02, 9.0)  | 0.05 | 1.1                     | (-4.0, 6.2) | 0.68 |
| Daily MVPA in ≥10 minute bouts (minutes) | 2.7                                                                                                                            | (-0.6, 6.0)  | 0.11 | 2.4                     | (-1.4, 6.1) | 0.22 |

\* Percentage differences are presented for BMI, which was log-transformed for analysis

All differences and % differences are adjusted for sex, age group, ethnic group, limiting longstanding illness, housing sector and a random effect to allow for clustering at household level.

Abbreviations: NH, neighbourhood

MVPA and MVPA in ≥10 minute bouts are an average daily estimate, obtained from averaging a participant’s weekly total.

Table 3: Adiposity and physical activity differences between housing sectors: adjustment for perceptions of neighbourhood quality

|                                             |              | Difference or % difference* compared to intermediate housing group<br>(95% confidence interval), p-value |         |                                                                    |         |  |
|---------------------------------------------|--------------|----------------------------------------------------------------------------------------------------------|---------|--------------------------------------------------------------------|---------|--|
|                                             |              | Model 1                                                                                                  |         | Model 2 (Additionally adjusted for<br>neighbourhood quality scale) |         |  |
| Housing<br>sector group                     |              |                                                                                                          |         |                                                                    |         |  |
| Adiposity (N = 1240)                        |              |                                                                                                          |         |                                                                    |         |  |
| Body mass index (kg/m <sup>2</sup> )*       | Social       | 5.0 (2.2, 7.8)                                                                                           | <0.001  | 4.5 (1.7, 7.3)                                                     | 0.002   |  |
|                                             | Intermediate | Reference group                                                                                          |         |                                                                    |         |  |
|                                             | Market rent  | -0.8 (-3.6, 2.0)                                                                                         | 0.57    | -0.9 (-3.6, 2.0)                                                   | 0.55    |  |
| Fat mass %                                  | Social       | 2.7 (1.5, 3.8)                                                                                           | <0.0001 | 2.5 (1.4, 3.6)                                                     | <0.0001 |  |
|                                             | Intermediate | Reference group                                                                                          |         |                                                                    |         |  |
|                                             | Market rent  | -0.2 (-1.4, 1.0)                                                                                         | 0.70    | -0.2 (-1.4, 0.9)                                                   | 0.68    |  |
| Physical activity (N = 1107)                |              |                                                                                                          |         |                                                                    |         |  |
| Daily steps                                 | Social       | -1125 (-1629, -620)                                                                                      | <0.0001 | -1016 (-1531, -501)                                                | <0.001  |  |
|                                             | Intermediate | Reference group                                                                                          |         |                                                                    |         |  |
|                                             | Market rent  | -104 (-633, 424)                                                                                         | 0.70    | -96 (-624, 431)                                                    | 0.72    |  |
| Daily MVPA (minutes)                        | Social       | -7.5 (-11.5, -3.6)                                                                                       | <0.001  | -6.8 (-10.8, -2.7)                                                 | 0.001   |  |
|                                             | Intermediate | Reference group                                                                                          |         |                                                                    |         |  |
|                                             | Market rent  | 2.3 (-1.9, 6.4)                                                                                          | 0.29    | 2.3 (-1.8, 6.5)                                                    | 0.27    |  |
| Daily MVPA in ≥10 minute bouts<br>(minutes) | Social       | -6.5 (-9.5, -3.5)                                                                                        | <0.0001 | -6.0 (-9.1, -3.0)                                                  | <0.001  |  |
|                                             | Intermediate | Reference group                                                                                          |         |                                                                    |         |  |
|                                             | Market rent  | 2.8 (-0.3, 6.0)                                                                                          | 0.08    | 2.8 (-0.3, 6.0)                                                    | 0.08    |  |

\* Percentage differences are presented for BMI, which was log-transformed for analysis

Model 1: Adjusted for sex, age group, ethnic group, limiting longstanding illness and clustering at household level (random effect)

Model 2: Adjusted as Model 1 plus neighbourhood quality scale (added as a continuous variable)

MVPA and MVPA in ≥10 minute bouts are an average daily estimate, obtained from averaging a participant's weekly total.

1  
2  
3  
4  
5  
6  
7  
8  
9  
10  
11  
12  
13  
14  
15  
16  
17  
18  
19  
20  
21  
22  
23  
24  
25  
26  
27  
28  
29  
30  
31  
32  
33  
34  
35  
36  
37  
38  
39  
40  
41  
42  
43  
44  
45  
46  
47

Figure 1: Daily physical activity by day of the week and housing sector group: N = 6206 days from 1107 participants

Means and 95% confidence intervals are adjusted for sex, age group, ethnic group, limiting longstanding illness, month of recording, day order of recording, day of week, housing sector, an interaction between housing sector and day of week and random effects to allow for multiple days of measurement and clustering of participants within households

For peer review only

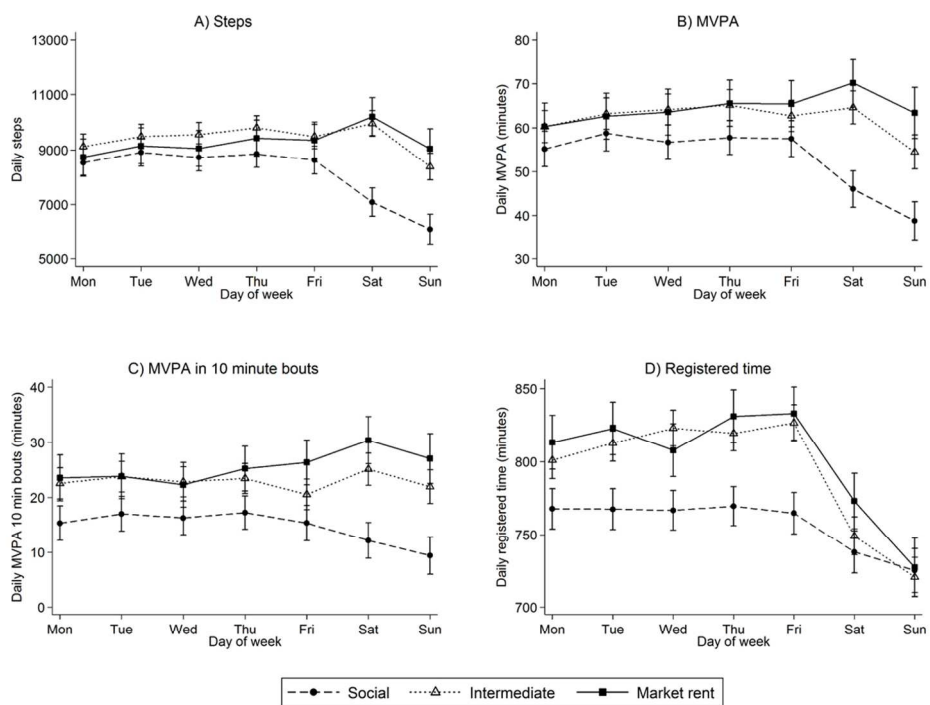

Figure 1: Daily physical activity by day of the week and housing sector group: N = 6206 days from 1107 participants

119x90mm (300 x 300 DPI)

**Supplementary Table 1: Questionnaire items included in the factor analysis on perceptions of the neighbourhood**

**Perceptions of neighbourhood crime items**

- There is a lot of crime in my neighbourhood.
- The level of crime in my neighbourhood makes it unsafe to walk on the streets at night.
- There are threatening groups of young people in my neighbourhood.
- The level of crime in my neighbourhood makes it unsafe to walk on the streets during the day.
- Vandalism, graffiti or deliberate damage to property is a problem in my local area.

**Perceptions of neighbourhood quality items**

- I enjoy walking in my neighbourhood.
- This area is a place I enjoy living in.
- My neighbourhood is attractive to look at (e.g. there are attractive buildings, green space. Landscaping views).
- This area has good leisure things for people like myself, leisure centres or community centres for example.
- You often see people out on walks or riding their bicycles in my neighbourhood.
- This area has good local transport.

**Additional items included in the factor analysis with factor loadings below 0.4 and were therefore not included in the solution**

- My neighbourhood is generally free from litter.
- There is too much traffic in my neighbourhood.
- Our neighbourhood streets have good lighting at night.

Participants were asked to select a response from the following for all questionnaire items stated in the table: Strongly agree, Agree, Neither agree nor disagree, Disagree, Strongly disagree



**Supplementary Table 2: Participant characteristics for 1240 adults with measurements of adiposity at baseline**

|                                  | Social<br>(n = 512) | Housing sector<br>Intermediate<br>(n = 503) | Market rent<br>(n = 225) | Total<br>(N = 1240) | p ( $\chi^2$ ) |
|----------------------------------|---------------------|---------------------------------------------|--------------------------|---------------------|----------------|
| <b>Sex</b>                       |                     |                                             |                          |                     |                |
| Male                             | 137 (26.8%)         | 259 (51.5%)                                 | 126 (56.0%)              | 522 (42.1%)         |                |
| Female                           | 375 (73.2%)         | 244 (48.5%)                                 | 99 (44.0%)               | 718 (57.9%)         | <0.0001        |
| <b>Age group</b>                 |                     |                                             |                          |                     |                |
| 16-24                            | 107 (20.9%)         | 92 (18.3%)                                  | 70 (31.1%)               | 269 (21.7%)         |                |
| 25-34                            | 129 (25.2%)         | 291 (57.9%)                                 | 111 (49.3%)              | 531 (42.8%)         |                |
| 35-49                            | 233 (45.5%)         | 102 (20.3%)                                 | 23 (10.2%)               | 358 (28.9%)         |                |
| 50+                              | 43 (8.4%)           | 18 (3.6%)                                   | 21 (9.3%)                | 82 (6.6%)           | <0.0001        |
| <b>Ethnic group</b>              |                     |                                             |                          |                     |                |
| White                            | 96 (18.8%)          | 342 (68.0%)                                 | 157 (69.8%)              | 595 (48.0%)         |                |
| Black                            | 245 (47.9%)         | 53 (10.5%)                                  | 16 (7.1%)                | 314 (25.3%)         |                |
| Asian                            | 107 (20.9%)         | 75 (14.9%)                                  | 28 (12.4%)               | 210 (16.9%)         |                |
| Mixed/Other                      | 64 (12.5%)          | 33 (6.6%)                                   | 24 (10.7%)               | 121 (9.8%)          | <0.0001        |
| <b>NS-SEC*</b>                   |                     |                                             |                          |                     |                |
| Higher Managerial / Professional | 60 (11.9%)          | 357 (71.4%)                                 | 150 (66.7%)              | 567 (46.1%)         |                |
| Intermediate Occupations         | 62 (12.3%)          | 77 (15.4%)                                  | 38 (16.9%)               | 177 (14.4%)         |                |
| Routine / Manual                 | 125 (24.8%)         | 34 (6.8%)                                   | 10 (4.4%)                | 169 (13.7%)         |                |
| Economically inactive            | 258 (51.1%)         | 32 (6.4%)                                   | 27 (12.0%)               | 317 (25.8%)         | <0.0001        |
| <b>Limiting illness</b>          |                     |                                             |                          |                     |                |
| Yes                              | 102 (19.9%)         | 40 (8.0%)                                   | 11 (4.9%)                | 153 (12.3%)         |                |
| No                               | 410 (80.1%)         | 463 (92.0%)                                 | 214 (95.1%)              | 1087 (87.7%)        | <0.0001        |

p ( $\chi^2$ ): p-value for Chi-squared test

\* 10 responses missing for NS-SEC group

**Supplementary Table 3: Mean levels of adiposity and physical activity by patient characteristics**

|                         |      | Mean/Geometric mean* levels adiposity and physical activity (95% confidence intervals) |              |            |              |              |              |                        |              |                                            |              |
|-------------------------|------|----------------------------------------------------------------------------------------|--------------|------------|--------------|--------------|--------------|------------------------|--------------|--------------------------------------------|--------------|
| n                       |      | BMI (kg/m <sup>2</sup> )*                                                              |              | Fat mass % |              | Daily steps† |              | Daily minutes of MVPA† |              | Daily minutes of MVPA in ≥10 minute bouts† |              |
| <b>Sex</b>              |      |                                                                                        |              |            |              |              |              |                        |              |                                            |              |
| Male                    | 522  | 25.4                                                                                   | (25.0, 25.8) | 20.4       | (19.7, 21.0) | 9279         | (8991, 9568) | 64.8                   | (62.6, 67.1) | 22.8                                       | (21.1, 24.4) |
| Female                  | 718  | 25.1                                                                                   | (24.8, 25.5) | 31.5       | (30.9, 32.0) | 8709         | (8464, 8954) | 55.6                   | (53.6, 57.5) | 18.7                                       | (17.3, 20.1) |
| <b>Age group</b>        |      |                                                                                        |              |            |              |              |              |                        |              |                                            |              |
| Age 16-24               | 269  | 23.5                                                                                   | (23.0, 24.0) | 23.0       | (22.1, 23.9) | 8534         | (8136, 8932) | 57.0                   | (53.9, 60.2) | 20.5                                       | (18.2, 22.8) |
| Age 25-34               | 531  | 25.0                                                                                   | (24.6, 25.3) | 26.2       | (25.5, 26.8) | 9035         | (8744, 9326) | 61.1                   | (58.8, 63.3) | 21.4                                       | (19.7, 23.1) |
| Age 35-49               | 358  | 26.6                                                                                   | (26.1, 27.1) | 29.3       | (28.5, 30.1) | 9232         | (8879, 9585) | 60.9                   | (58.1, 63.6) | 19.4                                       | (17.3, 21.4) |
| Age 50+                 | 82   | 27.6                                                                                   | (26.6, 28.7) | 32.2       | (30.5, 33.8) | 8525         | (7800, 9249) | 51.1                   | (45.4, 56.7) | 18.4                                       | (14.2, 22.7) |
| <b>Ethnic group</b>     |      |                                                                                        |              |            |              |              |              |                        |              |                                            |              |
| White                   | 595  | 24.9                                                                                   | (24.5, 25.2) | 25.8       | (25.1, 26.4) | 9491         | (9203, 9779) | 63.6                   | (61.3, 65.8) | 23.7                                       | (22.0, 25.4) |
| Black                   | 314  | 26.4                                                                                   | (25.8, 27.0) | 29.4       | (28.5, 30.3) | 8375         | (7961, 8789) | 56.2                   | (52.9, 59.4) | 17.1                                       | (14.7, 19.6) |
| Asian                   | 210  | 24.8                                                                                   | (24.2, 25.4) | 25.8       | (24.8, 26.8) | 8082         | (7608, 8556) | 52.1                   | (48.4, 55.8) | 15.6                                       | (12.8, 18.4) |
| Other/Mixed             | 121  | 25.2                                                                                   | (24.4, 26.0) | 26.8       | (25.5, 28.1) | 9060         | (8465, 9656) | 59.0                   | (54.3, 63.7) | 19.8                                       | (16.3, 23.3) |
| <b>Limiting illness</b> |      |                                                                                        |              |            |              |              |              |                        |              |                                            |              |
| No                      | 1087 | 25.1                                                                                   | (24.9, 25.4) | 26.6       | (26.1, 27.0) | 9077         | (8877, 9277) | 60.1                   | (58.6, 61.7) | 20.8                                       | (19.6, 21.9) |
| Yes                     | 153  | 26.2                                                                                   | (25.5, 27.0) | 28.2       | (27.0, 29.4) | 7996         | (7447, 8545) | 54.4                   | (50.1, 58.7) | 18.0                                       | (14.8, 21.1) |
| <b>Housing sector</b>   |      |                                                                                        |              |            |              |              |              |                        |              |                                            |              |
| Social                  | 512  | 26.0                                                                                   | (25.6, 26.5) | 28.4       | (27.6, 29.1) | 8298         | (7953, 8642) | 54.6                   | (51.8, 57.3) | 16.0                                       | (14.0, 18.1) |
| Intermediate            | 503  | 24.8                                                                                   | (24.4, 25.2) | 25.7       | (25.0, 26.4) | 9422         | (9110, 9735) | 62.1                   | (59.6, 64.5) | 22.5                                       | (20.6, 24.4) |
| Market-rent             | 225  | 24.6                                                                                   | (24.0, 25.2) | 25.5       | (24.5, 26.5) | 9318         | (8863, 9773) | 64.3                   | (60.8, 67.9) | 25.3                                       | (22.6, 28.1) |

\* Geometric means are presented for BMI

All means/geometric means are adjusted for sex, age group, ethnic group, limiting longstanding illness, housing sector and a random effect to allow for clustering at household level.

† Data missing for 133 participants for average daily steps, MVPA and MVPA in bouts

**Supplementary Table 4: Associations between participant characteristics and physical activity variables in participants with at least 4 days of recording of physical activity data**

|                         |     | Difference or % difference* in physical activity variable (95% confidence interval), p-value |               |         |                             |               |         |                                                 |                       |
|-------------------------|-----|----------------------------------------------------------------------------------------------|---------------|---------|-----------------------------|---------------|---------|-------------------------------------------------|-----------------------|
|                         | n   | Daily steps                                                                                  |               |         | Daily minutes spent in MVPA |               |         | Daily minutes spent in MVPA in ≥10 minute bouts |                       |
| <b>Sex</b>              |     |                                                                                              |               |         |                             |               |         |                                                 |                       |
| Male (Ref)              | 402 | -                                                                                            | -             | -       | -                           | -             | -       | -                                               | -                     |
| Female                  | 529 | -559                                                                                         | (-947, -172)  | 0.005   | -9.7                        | (-12.7, -6.7) | <0.0001 | -4.7                                            | (-6.8, -2.5) <0.0001  |
| <b>Age group</b>        |     |                                                                                              |               |         |                             |               |         |                                                 |                       |
| Age 16-24 (Ref)         | 180 | -                                                                                            | -             | -       | -                           | -             | -       | -                                               | -                     |
| Age 25-34               | 412 | 410                                                                                          | (-116, 936)   | 0.13    | 3.0                         | (-1.2, 7.2)   | 0.16    | -0.3                                            | (-3.3, 2.8) 0.87      |
| Age 35-49               | 276 | 520                                                                                          | (-45, 1086)   | 0.07    | 2.5                         | (-2.0, 6.9)   | 0.27    | -2.5                                            | (-5.7, 0.7) 0.12      |
| Age 50+                 | 63  | -25                                                                                          | (-889, 838)   | 0.95    | -7.9                        | (-14.8, -1.1) | 0.02    | -3.2                                            | (-8.2, 1.8) 0.20      |
| <b>Ethnic group</b>     |     |                                                                                              |               |         |                             |               |         |                                                 |                       |
| White (Ref)             | 482 | -                                                                                            | -             | -       | -                           | -             | -       | -                                               | -                     |
| Black                   | 214 | -1213                                                                                        | (-1789, -638) | <0.0001 | -7.1                        | (-11.7, -2.5) | 0.002   | -6.5                                            | (-9.9, -3.1) <0.001   |
| Asian                   | 142 | -1128                                                                                        | (-1719, -538) | <0.001  | -10.3                       | (-15.0, -5.6) | <0.0001 | -7.8                                            | (-11.3, -4.3) <0.0001 |
| Other/Mixed             | 93  | -582                                                                                         | (-1273, 110)  | 0.10    | -4.7                        | (-10.2, 0.8)  | 0.09    | -4.2                                            | (-8.2, -0.2) 0.04     |
| <b>Limiting illness</b> |     |                                                                                              |               |         |                             |               |         |                                                 |                       |
| No (Ref)                | 834 | -                                                                                            | -             | -       | -                           | -             | -       | -                                               | -                     |
| Yes                     | 97  | -976                                                                                         | (-1612, -341) | 0.003   | -4.6                        | (-9.6, 0.4)   | 0.07    | -2.0                                            | (-5.6, 1.6) 0.28      |
| <b>Housing sector</b>   |     |                                                                                              |               |         |                             |               |         |                                                 |                       |
| Social                  | 332 | -978                                                                                         | (-1515, -440) | <0.001  | -6.9                        | (-11.2, -2.6) | 0.002   | -7.2                                            | (-10.4, -4.0) <0.0001 |
| Intermediate (Ref)      | 410 | -                                                                                            | -             | -       | -                           | -             | -       | -                                               | -                     |
| Market-rent             | 189 | -359                                                                                         | (-889, 171)   | 0.185   | 0.2                         | (-4.0, 4.3)   | 0.91    | 0.9                                             | (-2.2, 4.1) 0.56      |

All differences are mutually adjusted for sex, age group, ethnic group, limiting longstanding illness, housing sector and a random effect to allow for clustering at household level.

MVPA and MVPA in ≥10 minute bouts are an average daily estimate, obtained from averaging a participant's weekly total.

**Supplementary Table 5: Physical activity differences between weekday (Monday-Friday) and weekend (Saturday, Sunday) activity by housing sector.**

| Physical activity variable (N = 1107) | Housing sector group | Mean (95% CI) weekday (Mon-Fri) activity |              | Difference in PA outcome compared to weekdays (95% confidence interval), p-value |                |         |                  |                |         |
|---------------------------------------|----------------------|------------------------------------------|--------------|----------------------------------------------------------------------------------|----------------|---------|------------------|----------------|---------|
|                                       |                      |                                          |              | Saturday - weekday                                                               |                |         | Sunday - weekday |                |         |
|                                       |                      |                                          |              | Mean                                                                             | 95% CI         | p-value | Mean             | 95% CI         | p-value |
| Daily steps                           | Social               | 8733                                     | (8364, 9103) | -1643                                                                            | (-2078, -1207) | <0.0001 | -2629            | (-3093, -2164) | <0.0001 |
|                                       | Intermediate         | 9497                                     | (9178, 9817) | 460                                                                              | (59, 862)      | 0.02    | -1104            | (-1528, -680)  | <0.0001 |
|                                       | Market-rent          | 9146                                     | (8673, 9619) | 1055                                                                             | (467, 1642)    | <0.001  | -102             | (-734, 531)    | 0.75    |
| MVPA (minutes)                        | Social               | 57.2                                     | (54.3, 60.1) | -11.2                                                                            | (-14.7, -7.7)  | <0.0001 | -18.4            | (-22.1, -14.7) | <0.0001 |
|                                       | Intermediate         | 63.1                                     | (60.6, 65.7) | 1.5                                                                              | (-1.8, 4.7)    | 0.37    | -8.5             | (-11.9, -5.1)  | <0.0001 |
|                                       | Market-rent          | 63.5                                     | (59.8, 67.3) | 6.6                                                                              | (1.9, 11.3)    | 0.01    | -0.1             | (-5.2, 5.0)    | 0.97    |
| MVPA in ≥10 minute bouts (minutes)    | Social               | 16.3                                     | (14.0, 18.5) | -4.1                                                                             | (-6.9, -1.3)   | 0.004   | -6.8             | (-9.8, -3.9)   | <0.0001 |
|                                       | Intermediate         | 22.6                                     | (20.7, 24.6) | 2.5                                                                              | (-0.06, 5.1)   | 0.06    | -0.7             | (-3.4, 2.0)    | 0.62    |
|                                       | Market-rent          | 24.2                                     | (21.3, 27.1) | 6.1                                                                              | (2.4, 9.9)     | 0.001   | 2.8              | (-1.2, 6.9)    | 0.17    |

Means and differences (95% confidence intervals) are adjusted for sex, age group, ethnic group, limiting longstanding illness, month of recording, day of the week, housing sector, an interaction between housing sector and day of week, and random effects to allow for multiple days of measurement and clustering of participants within household.

MVPA and MVPA in ≥10 minute bouts are an average daily estimate, obtained from averaging a participant's weekly total.

# BMJ Open

## Housing, neighbourhood and sociodemographic associations with adult levels of physical activity and adiposity: baseline findings from the ENABLE London Study

|                                 |                                                                                                                                                                                                                                                                                                                                                                                                                                                                                                                                                                                                                                                                                                                                                                                                                                                                                                                                                                                                                                                                                                                                                                                                                                                                                                                                                                                               |
|---------------------------------|-----------------------------------------------------------------------------------------------------------------------------------------------------------------------------------------------------------------------------------------------------------------------------------------------------------------------------------------------------------------------------------------------------------------------------------------------------------------------------------------------------------------------------------------------------------------------------------------------------------------------------------------------------------------------------------------------------------------------------------------------------------------------------------------------------------------------------------------------------------------------------------------------------------------------------------------------------------------------------------------------------------------------------------------------------------------------------------------------------------------------------------------------------------------------------------------------------------------------------------------------------------------------------------------------------------------------------------------------------------------------------------------------|
| Journal:                        | <i>BMJ Open</i>                                                                                                                                                                                                                                                                                                                                                                                                                                                                                                                                                                                                                                                                                                                                                                                                                                                                                                                                                                                                                                                                                                                                                                                                                                                                                                                                                                               |
| Manuscript ID                   | bmjopen-2017-021257.R2                                                                                                                                                                                                                                                                                                                                                                                                                                                                                                                                                                                                                                                                                                                                                                                                                                                                                                                                                                                                                                                                                                                                                                                                                                                                                                                                                                        |
| Article Type:                   | Research                                                                                                                                                                                                                                                                                                                                                                                                                                                                                                                                                                                                                                                                                                                                                                                                                                                                                                                                                                                                                                                                                                                                                                                                                                                                                                                                                                                      |
| Date Submitted by the Author:   | 11-Jul-2018                                                                                                                                                                                                                                                                                                                                                                                                                                                                                                                                                                                                                                                                                                                                                                                                                                                                                                                                                                                                                                                                                                                                                                                                                                                                                                                                                                                   |
| Complete List of Authors:       | Nightingale, C; St George's University London, Division of Population Health Sciences and Education<br>Rudnicka, Alicja; SGUL University of London<br>Ram, Bina; St George's, University of London, Population Health Research Institute<br>Shankar, Aparna; St. George's, University of London, Population Health Research Institute<br>Limb, Elizabeth; St George's University, Population Health Research Institute<br>Procter, Duncan; University of Bristol, Centre for Exercise, Nutrition and Health Sciences<br>Cooper, Ashley; University of Bristol,<br>Page, Angie; University of Bristol, Centre for Exercise, Nutrition and Health Sciences<br>Ellaway, Anne; University of Glasgow, MRC/SCO Social and Public Health Sciences Unit<br>Giles-Corti, Billie; RMIT University, NHMRC Centre of Research Excellence in Healthy Liveable Communities<br>Clary, Christelle; London School of Hygiene and Tropical Medicine, Social And Environmental Health Research<br>Lewis, Daniel; London School of Hygiene and Tropical Medicine,<br>Cummins, Steven; London School of Hygiene and Tropical Medicine, Department of Social and Environmental Health Research<br>Whincup, Peter; St Georges, University of London<br>Cook, Derek; St George's University, Division of Population Health Sciences<br>Owen, C; St George's, University London, Population Health Research Institute |
| <b>Primary Subject Heading</b>: | Epidemiology                                                                                                                                                                                                                                                                                                                                                                                                                                                                                                                                                                                                                                                                                                                                                                                                                                                                                                                                                                                                                                                                                                                                                                                                                                                                                                                                                                                  |
| Secondary Subject Heading:      | Cardiovascular medicine                                                                                                                                                                                                                                                                                                                                                                                                                                                                                                                                                                                                                                                                                                                                                                                                                                                                                                                                                                                                                                                                                                                                                                                                                                                                                                                                                                       |
| Keywords:                       | Physical activity, Adiposity, Housing, Perceived neighbourhood environment, ENABLE-London                                                                                                                                                                                                                                                                                                                                                                                                                                                                                                                                                                                                                                                                                                                                                                                                                                                                                                                                                                                                                                                                                                                                                                                                                                                                                                     |
|                                 |                                                                                                                                                                                                                                                                                                                                                                                                                                                                                                                                                                                                                                                                                                                                                                                                                                                                                                                                                                                                                                                                                                                                                                                                                                                                                                                                                                                               |

1  
2  
3  
4  
5  
6  
7  
8  
9  
10  
11  
12  
13  
14  
15  
16  
17  
18  
19  
20  
21  
22  
23  
24  
25  
26  
27  
28  
29  
30  
31  
32  
33  
34  
35  
36  
37  
38  
39  
40  
41  
42  
43  
44  
45  
46  
47  
48  
49  
50  
51  
52  
53  
54  
55  
56  
57  
58  
59  
60

SCHOLARONE™  
Manuscripts

For peer review only

1  
2  
3 **Housing, neighbourhood and sociodemographic associations with adult levels**  
4 **of physical activity and adiposity: baseline findings from the ENABLE London**  
5 **Study**  
6  
7

8 CM Nightingale<sup>1</sup>, AR Rudnicka<sup>1</sup>, B Ram<sup>1</sup>, A Shankar<sup>1</sup>, ES Limb<sup>1</sup>, D Procter<sup>2,3</sup>, AR Cooper<sup>2,3</sup>, AS  
9 Page<sup>2,3</sup>, A Ellaway<sup>4</sup>, B Giles-Corti<sup>5</sup>, C Clary<sup>6</sup>, D Lewis<sup>6</sup>, S Cummins<sup>6</sup>, PH Whincup<sup>1</sup>, DG Cook<sup>1</sup>,  
10 CG Owen<sup>1</sup>  
11  
12  
13  
14

15  
16 <sup>1</sup> Population Health Research Institute, St George's, University of London, London, UK.

17 <sup>2</sup> Centre for Exercise, Nutrition and Health Sciences, University of Bristol, Bristol, UK.

18  
19 <sup>3</sup> National Institute for Health Research Bristol Biomedical Research Centre, University  
20 Hospitals Bristol NHS Foundation Trust and University of Bristol, UK.  
21

22 <sup>4</sup> MRC/SCO Social and Public Health Sciences Unit, University of Glasgow, Glasgow, UK.

23  
24 <sup>5</sup> NHMRC Centre of Research Excellence in Healthy Liveable Communities, RMIT University,  
25 Melbourne, Australia.  
26

27 <sup>6</sup> London School of Hygiene and Tropical Medicine, London, UK.  
28  
29  
30

31 Corresponding Author:-

32 Dr Claire M Nightingale

33 Population Health Research Institute, St. George's, University of London, Cranmer Terrace,  
34 London SW17 0RE. Email: [cnightin@sgul.ac.uk](mailto:cnightin@sgul.ac.uk) Phone: +44 (0) 208 725 2342  
35  
36  
37

38  
39  
40 **Total word count:** 4550 excluding abstract (311 words)

41 **Tables and figures:** 3 tables, 1 figure, 5 supplementary tables

42  
43 **References:** 51  
44  
45  
46  
47  
48  
49  
50  
51  
52  
53  
54  
55  
56  
57  
58  
59  
60

1  
2  
3 **Abstract**

4  
5  
6 **Objectives:** The neighbourhood environment is increasingly shown to be an important  
7  
8 correlate of health. We assessed associations between housing tenure, neighbourhood  
9  
10 perceptions, sociodemographic factors, and levels of physical activity (PA) and adiposity  
11  
12 among adults seeking housing in East Village (formerly London 2012 Olympic/Paralympic  
13  
14 Games Athletes' Village).

15  
16  
17 **Setting:** Cross-sectional analysis of adults seeking social, intermediate and market-rent  
18  
19 housing in East Village.

20  
21  
22 **Participants:** 1278 participants took part in the study (58% female). Complete data on  
23  
24 adiposity (body mass index [BMI] and fat mass %) were available for 1240 participants  
25  
26 (97%); of these a sub-set of 1107 participants (89%) met the inclusion criteria for analyses of  
27  
28 accelerometer-based measurements of PA. We examined associations between housing  
29  
30 sector sought, neighbourhood perceptions (covariates) and PA and adiposity (dependent  
31  
32 variables) adjusted for household clustering, sex, age group, ethnic group, and limiting  
33  
34 longstanding illness.

35  
36  
37 **Results:** Participants seeking social housing had the fewest daily steps (8304, 95%CI  
38  
39 7959,8648) and highest BMI (26.0kg/m<sup>2</sup> 95%CI 25.5,26.5kg/m<sup>2</sup>) compared with those  
40  
41 seeking intermediate (daily steps 9417, 95%CI 9106,9731; BMI 24.8kg/m<sup>2</sup> 95%CI  
42  
43 24.4,25.2kg/m<sup>2</sup>) or market-rent housing (daily steps 9313, 95%CI 8858,9768; BMI 24.6kg/m<sup>2</sup>  
44  
45 95%CI 24.0,25.2kg/m<sup>2</sup>). Those seeking social housing had lower levels of PA (by 19-42%) at  
46  
47 weekends vs weekdays, compared with other housing groups. Positive perceptions of  
48  
49 neighbourhood quality were associated with higher steps and lower BMI, with differences  
50  
51 between social and intermediate groups reduced by ~10% following adjustment, equivalent  
52  
53 to a reduction of 111 for steps and 0.5kg/m<sup>2</sup> for BMI.  
54  
55  
56  
57  
58  
59  
60



1 **Conclusions:** The social housing group undertook less PA than other housing sectors, with  
2 weekend PA offering the greatest scope for increasing PA, and tackling adiposity in this  
3 group. Perceptions of neighbourhood quality were associated with PA and adiposity and  
4 reduced differences in steps and BMI between housing sectors. Interventions to encourage  
5 physical activity at weekends and improve neighbourhood quality, especially amongst the  
6 most disadvantaged, may provide scope to reduce inequalities in health behaviour.

#### 8 **Strengths and limitations of this study**

- 9 • Large sample with representation of three different aspirational housing groups,  
10 providing a wide range of socioeconomic backgrounds
- 11 • Objective measurements of physical activity and adiposity outcomes using  
12 accelerometry and bioelectrical impedance respectively
- 13 • Lower number of participants studied seeking market-rent housing compared with  
14 those seeking intermediate or social housing

#### 16 **Keywords**

17 Physical activity; Adiposity; Housing; Perceived neighbourhood environment; ENABLE-  
18 London

19

## 1 **Introduction**

2 Physical inactivity and adiposity are associated with an increased risk of type 2 diabetes and  
3 cardiovascular disease (1-4) and constitute a serious public health problem in the UK and  
4 globally (5). Evidence suggests that levels of physical activity (PA) are lower among those  
5 who are socioeconomically disadvantaged (6), who experience greater economic, access  
6 and health related barriers to being physically active (7). Socioeconomic status is also  
7 associated with differences in types of PA, in particular higher socioeconomic status is  
8 associated with more vigorous leisure time PA (8). Previous research has found variation in  
9 PA by day of the week with studies showing lower levels of activity on Sundays compared  
10 with weekdays in young adults (9), parents and their children (10).

11  
12 There is emerging evidence suggesting that housing tenure is an important determinant of  
13 health. In particular, UK-based studies have shown that housing tenure (owner vs. private  
14 renter vs. public sector renter) is associated with poor health (11;12). Amongst particular  
15 groups including those who are economically inactive or unemployed, housing tenure might  
16 provide a better indication of socioeconomic status compared with measures based on  
17 occupation or income (13). Indeed, in several studies housing tenure remained associated  
18 with health outcomes following adjustment for conventional measures of socioeconomic  
19 status such as income or education (11;14). A more nuanced approach is therefore required  
20 with respect to measures of socioeconomic status, and they should not be simply regarded  
21 as interchangeable (12;15). Despite this, there has been limited research examining the  
22 direct effect of housing tenure on PA, and existing evidence is equivocal. Harrison and  
23 colleagues found no association between housing tenure and meeting recommended levels  
24 of PA among community dwelling healthy adults in the North-East of England (16). Similarly

1 housing tenure was not associated with self-reported energetic PA among older Australians  
2 (17). Ogilvie and colleagues found overall levels of PA to be higher among individuals living  
3 in social housing compared with owner-occupiers (18). The authors suggest that may  
4 capture occupational PA levels which are likely to be higher among those in social housing  
5 (18). In contrast, living in private rental accommodation was associated with a greater  
6 likelihood of taking up exercise over a 9-year period among men aged 18-49 at baseline,  
7 compared with those in local authority accommodation (19).

8  
9 Housing tenure may affect health and health behaviours in part through characteristics of  
10 the home or neighbourhood itself (20;21) or psychological factors such as self-efficacy or  
11 self-esteem (22). Social housing estates which are common in the UK may be associated  
12 with specific cultures and norms, which in turn shape residents' behaviours (11). Subjective  
13 characteristics of the neighbourhood environment including higher perceived access to  
14 recreational facilities and shops in local proximity have been shown to be associated with  
15 higher levels of PA (23;24). Residents who perceive their neighbourhood more positively,  
16 have been shown to have better mental health and are less likely to relocate (25).  
17 Conversely, real and perceived crime, has the potential to constrain residents' PA (26).  
18 However, a recent systematic review suggested a lack of association between PA and  
19 perceptions of safety from crime; highlighting the need for high quality evidence, including  
20 prospective studies and natural experiments (27), to examine this issue further. In  
21 particular, high quality evidence is needed to understand the potentially multifactorial  
22 influence of residential location on health and health behaviours; effects which are likely to  
23 extend beyond simple measures of socioeconomic status (27).

1  
2  
3 1 The Examining Neighbourhood Activities and Built Living Environments in London (ENABLE  
4  
5 2 London) study is a longitudinal study evaluating how active urban design influences the  
6  
7 3 health and wellbeing of people moving into the former Athletes' Village of the London 2012  
8  
9  
10 4 Olympic and Paralympic Games now known as 'East Village' (28). East Village is a new high-  
11  
12 5 density neighbourhood development built on active design principles containing a mix of  
13  
14 6 social housing, intermediate (including affordable rent, shared ownership and shared  
15  
16 7 equity) housing, and market-rent housing. This paper draws on baseline data (prior to any  
17  
18 8 potential move to East Village) to first, examine predictors of PA and adiposity (measured  
19  
20 9 objectively using accelerometry and bioelectrical impedance), including the housing sector  
21  
22 10 to which they are applying and perceptions of their neighbourhood. Second, to examine  
23  
24 11 whether PA patterns across the week vary by housing sector and third, to examine whether  
25  
26 12 adjustment for perceptions of the neighbourhood environment reduce housing sector  
27  
28 13 differences in PA and adiposity.  
29  
30  
31  
32  
33  
34

14

## 15 **Methods**

16 Study participants were recruited from those seeking or who had applied for new  
17 accommodation in East Village and were classified by the type of housing tenure sought  
18 based on level of income; i.e. social, intermediate or market-rent. The inclusion criteria was  
19 broad and included anyone interested / applying for single or multiple occupancy  
20 accommodation in East Village. There was no explicit exclusion criteria; adults of any age,  
21 gender, ethnic group, with or without handicap, were invited to participate. Current  
22 housing status was strongly linked to aspirational housing status, where those seeking social  
23 accommodation were currently in social housing or on social housing waiting lists, and those  
24 seeking intermediate and market-rent accommodation were largely in privately rented

1  
2  
3 1 housing. Recruitment of participants in the different housing sectors was carried out  
4  
5 2 between January 2013 and December 2015 in three phases determined by the order of  
6  
7 3 availability of housing in East Village (social, intermediate, and market-rent respectively).  
8  
9 4 Those applying for social housing in East Village were initially recruited between January  
10  
11 5 2013 and May 2014, households seeking intermediate accommodation between July 2013  
12  
13 6 and November 2014 and those seeking market rent accommodation between September  
14  
15 7 2014 and December 2015. Recruitment processes for those applying for social housing  
16  
17 8 were slightly different compared with other housing sectors. The East Thames Group  
18  
19 9 housing association was primarily responsible for recruiting participants in social housing,  
20  
21 10 whereas the ENABLE London team (in association with Triathlon Homes and Get Living  
22  
23 11 London) recruited participants from the other housing sectors (28). Aspirational housing  
24  
25 12 tenure is integral to the design of ENABLE London, and we have shown that this provides a  
26  
27 13 clear socioeconomic marker of study participants. For example, those seeking social housing  
28  
29 14 in East Village are more likely to be unemployed, less educated and more likely to represent  
30  
31 15 ethnic minorities (a classic marker of socioeconomic vulnerability), compared to those  
32  
33 16 seeking affordable and market-rent accommodation (28). We have also shown key  
34  
35 17 differences in mental health and well-being between housing groups, where those seeking  
36  
37 18 social housing were more likely to be depressed, anxious and have poorer well-being,  
38  
39 19 compared to other housing groups (29). Moreover, this is entirely consistent with earlier  
40  
41 20 studies which found that both current housing tenure and aspirational housing tenure are  
42  
43 21 associated with a variety of health outcomes, including mental health and measures of  
44  
45 22 general health (20;30).  
46  
47  
48  
49  
50  
51  
52  
53  
54  
55  
56  
57  
58  
59  
60

1  
2  
3 1 Baseline assessments of participants were carried out in their place of residence before any  
4  
5 2 potential move to East Village. Full details of the recruitment process can be found  
6  
7 3 elsewhere (28).  
8  
9  
10 4

## 11 5 **Independent variables**

12 6 A team of trained fieldworkers administered self-complete questionnaires on a laptop  
13  
14 7 during home visits. Data on age, sex, self-defined ethnicity, work status, occupation and  
15  
16 8 whether the participant had a limiting longstanding illness or disability (lasting or expected  
17  
18 9 to last at least 12 months) were collected. Participants self-defined as 'White', 'Asian',  
19  
20 10 'Black', 'Mixed', or 'Other'; the latter two categories were combined for analyses.  
21  
22 11 Socioeconomic status based on occupation was coded using the National Statistics Social-  
23  
24 12 Economic Coding (NS-SEC) to categorise participants into 'higher managerial or professional  
25  
26 13 occupations', 'intermediate occupations', 'routine or manual' (31). An additional  
27  
28 14 'economically inactive' category included those seeking employment, unable to work due to  
29  
30 15 disability or illness, retired, looking after home and family, and students. We sought  
31  
32 16 information on educational attainment; participants were categorised into "Degree or  
33  
34 17 equivalent / Higher", "Intermediate qualifications" (including A levels and GCSEs), and  
35  
36 18 "Other / None" (including work-based or foreign qualifications). Participants completed  
37  
38 19 questionnaires assessing neighbourhood perceptions (29). Five items assessed perceived  
39  
40 20 crime (e.g., "There is a lot of crime in my neighbourhood"; Cronbach's  $\alpha = 0.87$ ) and six  
41  
42 21 items assessed neighbourhood quality (e.g. "This area is a place I enjoy living in"; Cronbach's  
43  
44 22  $\alpha = 0.78$ ). Responses on items were summed and scores ranged from -10 to +10 for  
45  
46 23 perceived crime and -12 to +12 for perceived quality, such that positive scores indicate less  
47  
48 24 perceived crime and better neighbourhood quality while negative scores indicate more  
49  
50  
51  
52  
53  
54  
55  
56  
57  
58  
59  
60

1  
2  
3 1 perceived crime and poorer quality. The scales were derived following an exploratory factor  
4  
5 2 analysis of 14 questions regarding neighbourhood (Supplementary Table 1).  
6  
7 3

#### 4 **Dependent variables**

5 Height was measured to the last complete millimetre using a portable stadiometer; weight  
6 was measured to the nearest kilogram using a Tanita SC-240 Body Composition Analyzer  
7 (Tanita, Tokyo, Japan); body mass index (BMI) was derived as  $\text{weight(kg)}/\text{height(m)}^2$ . The  
8 Tanita SC-240 Body Composition Analyzer also measured leg-to-leg bioelectrical impedance  
9 from which fat free mass and fat mass were estimated. Fat mass percentage was calculated  
10 as  $\text{fat mass (kg)}/\text{weight (kg)}*100$ .  
11

12 Participants wore a hip-mounted ActiGraph GT3X+ accelerometer during waking hours over  
13 a consecutive period of 7 days (ActiGraph LLC, Florida, USA). These accelerometers  
14 provided daily measures of steps, counts and time spent in moderate and vigorous PA  
15 (MVPA) using established cut-offs. Daily time spent in MVPA both overall and in  $\geq 10$  minute  
16 bouts in accordance with UK recommendations for PA (32) were assessed. The cut-point for  
17 moderate PA was defined as  $\geq 1952$  counts per minute (33). We excluded any days of  
18 recording where the amount of registered time accumulated was below 540 minutes (34).  
19

20 Non-wear periods were defined as a minimum length of 60 minutes, allowing for a 2-minute  
21 spike tolerance. Participants with at least one day of recording were retained in analyses.

22 We fitted a multilevel linear model for each outcome to allow for repeated measurements  
23 of daily PA, by fitting participant as a random effect and adjusting for day of the week, day  
24 order of recording and month as fixed effects. Raw level one residuals were obtained from  
the model and a within person average value of each outcome variable was obtained by

1  
2  
3 1 averaging these raw residuals. The average of these raw residuals for each participant was  
4  
5 2 added to the sample mean for that particular PA variable to derive an unbiased average  
6  
7 3 level of each PA variable for each person.  
8  
9  
10 4

## 11 5 **Statistical analysis**

12 6 All analyses were carried out using STATA/SE software (Stata/SE 14 for Windows; StataCorp  
13  
14 7 LP, College Station, TX, USA). Outcome variables were inspected for normality and BMI was  
15  
16 8 log transformed due to its skewed distribution. Multilevel linear regression models were  
17  
18 9 fitted, mutually adjusted for housing sector and participant characteristics (sex, age group,  
19  
20 10 ethnic group, and limiting longstanding illness) as fixed effects, with a random effect to  
21  
22 11 allow for household clustering. Residuals did not show departure from linearity, suggesting  
23  
24 12 that the model assumptions were appropriate. Absolute differences or percentage  
25  
26 13 differences for log transformed outcomes (i.e. BMI) are presented by sex, age group, ethnic  
27  
28 14 group, limiting longstanding illness and housing sector. Sensitivity analyses examined  
29  
30 15 whether associations remained when the sample was restricted to 931 participants (84%)  
31  
32 16 with at least four days of 540 or more minutes per day of recording.  
33  
34  
35  
36  
37  
38  
39  
40  
41  
42  
43

44 18 To assess differences in PA by day of the week as opposed to overall levels of PA we took  
45  
46 19 the following approach. Daily PA data were examined using multilevel models with random  
47  
48 20 effects to allow for multiple days of recording within person and household clustering. An  
49  
50 21 interaction between housing sector and day of the week was fitted and models were  
51  
52 22 adjusted for sex, age group, ethnic group, limiting longstanding illness, day order of  
53  
54 23 recording and month of measurement as fixed effects.  
55  
56  
57  
58  
59  
60



1  
2  
3 1 The associations between neighbourhood perception scales and adiposity and PA outcomes  
4  
5 2 were examined. Each of the neighbourhood quality and crime scores were included in the  
6  
7 3 models as quintiles, to examine the differences in outcomes between the top and bottom  
8  
9 4 quintile. Finally, the effect of adjustment for neighbourhood perception on differences in  
10  
11 5 adiposity and PA between housing sectors was examined. If associations between outcomes  
12  
13 6 and neighbourhood perceptions appeared linear, models examining housing sector  
14  
15 7 differences were additionally adjusted for neighbourhood perceptions as a continuous  
16  
17 8 variable.  
18  
19  
20  
21  
22

## 23 10 **Patient and Public Involvement**

24  
25  
26 11 The ENABLE London study was developed in partnership with a network of both local and  
27  
28 12 regional stakeholders identified through our collaborator links to agencies, involved with the  
29  
30 13 design, planning and management of large-scale accommodation developments. Locally  
31  
32 14 these included local authorities (particularly Newham) and a number of housing  
33  
34 15 associations, in particular Triathlon Homes, a partner organisation of housing associations,  
35  
36 16 which manages social and intermediate homes in East Village. Participants have been  
37  
38 17 involved in the study from an early stage to ensure assessments and participation remain  
39  
40 18 relevant and enjoyable, to ensure the continued significance and potential generalisability  
41  
42 19 of the work.  
43  
44  
45  
46  
47  
48

## 49 21 **Results**

50  
51 22 Of 1819 households who agreed to be contacted by the study team in order to receive  
52  
53 23 further information about the ENABLE London study, 1278 adults from 1006 households  
54  
55 24 (55%) participated in the study and completed a questionnaire. Participation rates for those  
56  
57  
58  
59  
60

1  
2  
3 1 seeking market-rent and intermediate housing were 58% and 57% respectively and were  
4  
5 2 slightly lower in the social group (52%). Complete data on adiposity were available for 1240  
6  
7 3 participants (97%); of these a sub-set of 1107 participants (89%) met the inclusion criteria  
8  
9 4 for analyses of objectively measured PA. Participant characteristics (age, sex) and levels of  
10  
11 5 adiposity were similar among those who did and did not provide PA data; however,  
12  
13 6 participants from black and Asian ethnic groups were less likely to provide PA data.  
14  
15 7 Supplementary Table 2 shows participants characteristics at baseline for the 1240 adults  
16  
17 8 with measurements of adiposity at baseline. Those seeking social housing were more likely  
18  
19 9 to be female, of older age, of non-white ethnicity, to have limiting longstanding illness, and  
20  
21 10 be in routine / manual occupations or economically inactive compared to those seeking  
22  
23 11 intermediate or market-rent housing.  
24  
25  
26  
27  
28  
29

30  
31 13 Adjusted mean levels of adiposity and PA outcomes by housing sector and participant  
32  
33 14 characteristics are shown in Supplementary Table 3. Table 1 shows housing sector and  
34  
35 15 other participant characteristics associations with BMI and fat mass %, and objectively  
36  
37 16 measured PA (steps, time spent in MVPA, time spent in MVPA in  $\geq 10$  minute bouts).  
38  
39 17 Participants seeking social housing had markedly higher levels of BMI and fat mass % and  
40  
41 18 markedly lower levels of steps, MVPA and MVPA in  $\geq 10$  minute bouts compared with those  
42  
43 19 seeking intermediate housing, though there were no differences between those seeking  
44  
45 20 market-rent and intermediate accommodation.  
46  
47  
48  
49

50  
51 22 Fat mass % was higher in females than males though there was no difference in BMI (Table  
52  
53 23 1). BMI and fat mass % were higher among all older age groups compared with 16-24 year  
54  
55 24 olds. Participants of black ethnicity had higher levels of BMI and fat mass % compared with  
56  
57  
58  
59

1 whites; there were no differences in BMI and fat mass % between Asian or other/mixed  
2 ethnic groups and whites. Those with a limiting longstanding illness had higher levels of  
3 both BMI and fat mass %. All PA measures were lower among females. Steps and MVPA  
4 were slightly higher in 25-34 year olds and steps were also higher among 35-49 year olds  
5 compared with 16-24 year olds; however, there were no age group differences for MVPA in  
6  $\geq 10$  minute bouts. Participants of black and Asian ethnicities had lower levels of steps,  
7 MVPA and MVPA in  $\geq 10$  minute bouts compared to whites. Participants who reported  
8 having a limiting longstanding illness had lower levels of steps and MVPA, but not MVPA in  
9  $\geq 10$  minute bouts. Educational attainment level was not associated with any of the  
10 outcomes once housing sector had been adjusted for and adjustment for educational  
11 attainment did not materially alter housing sector differences in adiposity or PA outcomes  
12 (data available from authors).

13  
14 Sensitivity analyses for PA outcomes were carried out in 931 participants who wore an  
15 ActiGraph for at least four days with at least 540 minutes of recording per day  
16 (Supplementary Table 4). There were no differences between market-rent and  
17 intermediate groups (consistent with the main analysis presented in Table 1). Differences  
18 between social and intermediate groups were broadly similar with the results presented in  
19 Table 1 for the main analysis.

20  
21 Differences in PA variables between housing groups were examined by day of the week to  
22 explore whether differences between groups were consistent across the week (Figure 1A-  
23 D). Levels of PA (steps (panel A), MVPA (panel B) and MVPA in  $\geq 10$  minute bouts (panel C))  
24 were generally consistent across weekdays (Monday – Friday) among all groups. In the

1  
2  
3 1 intermediate group, steps were higher on Saturdays and lower on Sundays; MVPA and  
4  
5 2 MVPA in  $\geq 10$  minute bouts were lower on Sundays but there was no difference on  
6  
7 3 Saturdays compared to weekday activity. In the market-rent group, steps, MVPA and MVPA  
8  
9 4 in  $\geq 10$  minute bouts were higher on Saturdays and similar to weekdays on Sundays. In the  
10  
11 5 social group, steps, MVPA and MVPA in  $\geq 10$  minute bouts were on average lower on  
12  
13 6 Saturdays and lower still on Sundays. Registered time (panel D) was lowest on average in  
14  
15 7 the social group during weekdays, decreasing on Saturdays and Sundays. The intermediate  
16  
17 8 and market-rent groups had higher levels of registered time during weekdays compared  
18  
19 9 with the social group which decreased on average on Saturdays and Sundays (despite  
20  
21 10 recording more steps and minutes in MVPA suggesting a higher intensity of activity). Mean  
22  
23 11 levels of steps, MVPA, and MVPA in  $\geq 10$  minute bouts on weekdays and differences on  
24  
25 12 Saturday and Sunday compared to weekdays are shown by housing sector in Supplementary  
26  
27 13 Table 5. The marked differences in activity between weekdays and weekend days in the  
28  
29 14 social group are not explained by differences in registered time (data available from  
30  
31 15 authors).  
32  
33 16  
34  
35  
36  
37  
38  
39 17 Associations between perceived neighbourhood quality and crime scales and adiposity and  
40  
41 18 PA outcomes are shown in Table 2, adjusted for the participant characteristics shown in  
42  
43 19 Table 1. Participants with the most positive perceptions of neighbourhood quality (highest  
44  
45 20 quintile) had lower BMI, higher steps and recorded longer durations of MVPA compared  
46  
47 21 with those who had the most negative perceptions of neighbourhood quality (lowest  
48  
49 22 quintile). There were no significant associations between perceptions of neighbourhood  
50  
51 23 crime and adiposity or PA.  
52  
53  
54  
55  
56 24

1  
2  
3 1 The effect of adjustment for perceived neighbourhood quality on differences in adiposity  
4  
5 2 and PA between housing sector groups is presented in Table 3. All associations between  
6  
7 3 perceived neighbourhood quality and crime and outcome variables were approximately  
8  
9 4 linear and were therefore fitted as continuous variables in the model. In addition,  
10  
11 5 associations between perceived neighbourhood quality and crime and outcome variables  
12  
13 6 were similar across the three housing groups (all  $p>0.05$ ). Adjustment for perceptions of  
14  
15 7 neighbourhood quality reduced differences in BMI, fat mass %, steps, MVPA and MVPA in  
16  
17 8  $\geq 10$  minute bouts between the social and intermediate groups by 10%, 6%, 10%, 10% and  
18  
19 9 7% respectively. Differences between market-rent and intermediate groups in adiposity and  
20  
21 10 PA variables were not statistically significant before or after adjustment. A larger  
22  
23 11 proportion of the social-intermediate group differences in steps, MVPA and MVPA in  $\geq 10$   
24  
25 12 minute bouts on weekends was explained by adjustment for perceptions of neighbourhood  
26  
27 13 quality (10%, 16% and 16% respectively) compared to the differences in steps, MVPA and  
28  
29 14 MVPA in  $\geq 10$  minute bouts on weekdays which were reduced by 10%, 8% and 3%  
30  
31 15 respectively (data not shown).  
32  
33  
34  
35  
36  
37  
38  
39

16

## 17 ***Discussion***

18 The results of this study showed that participants seeking social housing in East Village had  
19 lower levels of PA and higher levels of BMI and fat mass % compared with those seeking  
20 intermediate and market-rent housing, even when adjusted for demographic factors. In the  
21 social housing group, levels of PA were particularly low on weekends compared with  
22 weekdays possibly reflecting higher occupational PA and lower leisure time PA; weekday-  
23 weekend differences in PA were less marked among those seeking intermediate and  
24 market-rent housing. However, the lower registered time at weekends but higher MVPA

1 and steps suggests more intense activity at weekends in the intermediate and market-rent  
2 housing groups. These findings may inform targeted interventions to increase PA and  
3 reduce adiposity in different socioeconomic groups.

4  
5 Positive associations between perceived neighbourhood quality and PA, BMI and fat mass %  
6 were also shown. Adjustment for differences in perceived neighbourhood quality reduced  
7 differences in PA and BMI by approximately 10% between social and intermediate housing  
8 groups; equivalent to a reduction of 111 for daily steps, 0.5 minutes for MVPA and 0.5kg/m<sup>2</sup>  
9 for BMI. However, a larger proportion of the difference in PA was apparent at weekends;  
10 equivalent to a reduction of 222 for daily steps and 2.2 minutes for MVPA.

#### 11 12 **Relation to previous studies**

13 Studies have shown that lower socioeconomic status is associated with lower levels of PA  
14 (35;36), and that those from more socially deprived backgrounds have the most barriers to  
15 being physically active (7). Previous research examining the role of housing tenure is limited.  
16 Findings from this study showed marked differences in PA and adiposity between those  
17 seeking social, intermediate and market-rent housing. In particular, lower PA and higher  
18 adiposity in participants seeking social housing, a group which comprises a high proportion  
19 of people from more socioeconomically disadvantaged backgrounds (28). The higher levels  
20 of BMI and fat mass % in those seeking social housing compared with those seeking  
21 intermediate or market-rent housing is consistent with systematic reviews which have  
22 found an association between lower socioeconomic status and higher levels of adiposity,  
23 particularly in higher income countries and among women (37). While socioeconomic  
24 status is a strong determinant of housing status, to our knowledge this is the first study to

1 explicitly examine housing sector differences in objective PA and markers of adiposity levels  
2 (i.e. BMI and fat mass %). However, it is important to consider more broadly what these  
3 aspirational housing sector differences might represent. Related studies have shown that  
4 those in social housing are less likely to use active travel compared with owner occupiers  
5 (18), and that those in social housing and home owners with a mortgage are more likely to  
6 be obese and have higher levels of illness and disability compared to outright home owners,  
7 even after adjustment for other socioeconomic status markers (38). These latter findings  
8 suggest that the effect of home ownership may be more complex and cannot be simply  
9 explained by socioeconomic status. Neighbourhood quality may offer a potential partial  
10 explanation for these findings (39). In the present study perceptions of better  
11 neighbourhood quality were associated with PA whereas perceptions of crime were not. In  
12 contrast, a large UK-based study found that perceptions of feeling safe in the  
13 neighbourhood had the largest effect on levels of PA compared with perceptions of leisure  
14 facilities, sense of belonging or access to public transport or amenities (40). Another study  
15 in the US found that low perceived safety from crime was associated with lower levels of  
16 MVPA (41). However, a recent review concluded that higher quality evidence is needed,  
17 including prospective studies and natural experiments in areas of wide crime variability, in  
18 order to further understand the effect of crime on physical and mental health (27).

19 Moreover, previous work has suggested that objective and perceived measures of the built  
20 environment correlate differently with physical activity levels, suggesting that these  
21 measures are assessing different dimensions of the built environment which relate  
22 differently to health behaviour (42).

23

1  
2  
3 1 Our findings showed that PA levels were particularly low on the weekend among those  
4  
5 2 seeking social housing, which is consistent with findings from a systematic review which  
6  
7 3 found that leisure-time PA (which may be more likely to occur on weekends) was lower  
8  
9 4 amongst those from lower socioeconomic groups (8). This suggests that low-cost strategies  
10  
11 5 to increase weekend PA may be particularly beneficial to more disadvantaged households.  
12  
13  
14 6 A free community-based program in Bogata Colombia, temporarily closed streets on  
15  
16 7 Sundays to encourage PA amongst more disadvantaged local residents (43). A similar  
17  
18 8 program has been trialled in the United States (44), however the effectiveness, longevity  
19  
20 9 and generalisability of these programs to other socioeconomically deprived areas is yet to  
21  
22 10 be established.  
23  
24  
25  
26  
27

## 28 **Strengths and limitations**

29  
30 13 Strengths of this study include the representation of three different aspirational housing  
31  
32 14 groups which provides a wide range of socioeconomic backgrounds. Of those seeking social  
33  
34 15 housing, two-thirds (67%) were currently living in social housing accommodation provided  
35  
36 16 by the local authority or housing association; the remainder were largely currently living in  
37  
38 17 privately rented accommodation with many on social housing waiting lists. Of those seeking  
39  
40 18 intermediate or market-rent accommodation, almost two-thirds were living in privately  
41  
42 19 rented accommodation (both 64%); the remainder were largely living with relatives or  
43  
44 20 friends. The study sample is large with good representation from a 'hard to reach' group of  
45  
46 21 social housing participants. Participation rates were high given the target group, with  
47  
48 22 between 50-60% of those who initially agreed to be contacted taking part in the study. The  
49  
50 23 ActiGraph GT3X+ accelerometer provided validated objective measures of PA (45) and the  
51  
52 24 use of bioelectrical impedance to provide more direct measurements of adiposity including  
53  
54  
55  
56  
57  
58  
59  
60



1 fat mass %, which may provide a more valid marker of adiposity than BMI, particularly in a  
2 multi-ethnic population (46;47). Reassuringly the patterns of PA by sex, ethnic group and  
3 health status were consistent with those published previously (48-50). A limitation of the  
4 study is the lower number of participants in the market-rent sector compared with the  
5 other groups. This was due to restrictions imposed on the study team on the extent and  
6 duration of access to potential applicants seeking market-rent accommodation. While the  
7 study is longitudinal, these analyses are cross-sectional limiting the degree to which causal  
8 inferences can be made. Moreover, there is the possibility of selection amongst study  
9 participants, where those who are more active seek to move to East Village, may be more  
10 likely to participate in the study and may perceive their environment differently, which may  
11 limit the generalisability of the findings to neighbourhoods outside of East London.

### 13 **Conclusions and future work**

14 The findings presented in this paper suggest that perceived neighbourhood quality is  
15 associated with meaningful differences in PA and markers of adiposity. Differences in steps  
16 (680 steps) and BMI ( $3.6\text{kg/m}^2$ ) between the lowest and highest quintiles of perceived  
17 neighbourhood quality should be considered in the context of an average 10,000 steps per  
18 day, where a 5% increase (500 steps) would be a worthwhile population level increase and a  
19  $5\text{kg/m}^2$  increase in BMI is associated with a 31% increase in all-cause mortality (51). Hence,  
20 improvements in neighbourhood quality could be associated with health benefits of public  
21 health importance. There were also substantial differences in PA, BMI and fat mass %  
22 between the three housing groups studied. In particular the very low levels of PA in the  
23 social housing group during the weekend could provide a target for intervention to increase  
24 levels of PA; again these differences should be considered in relation to 500 steps per day,

1  
2  
3 1 which can be considered as an increase of population importance. Perceptions of  
4  
5 2 neighbourhood quality reduced differences in PA and adiposity between housing sector  
6  
7 3 groups, and the possibility of measuring more objective markers of neighbourhood quality  
8  
9 4 within this study has the potential to explain more (42). The future follow-up of the ENABLE  
10  
11 5 London cohort will allow us to examine whether moving to 'East Village', a neighbourhood  
12  
13 6 designed for healthy active living, will have a positive impact on PA and/or adiposity levels.  
14  
15 7 A major aim of the study is to identify features of the local built environment that increase  
16  
17 8 levels of PA which could potentially help to reduce socioeconomic inequalities in health. It  
18  
19 9 will be of particular interest to determine whether an increase in PA is more apparent in the  
20  
21 10 social housing group whose neighbourhood characteristics should improve. Furthermore,  
22  
23 11 we will be in a position to examine whether any potential effects of the built environment  
24  
25 12 on PA are modified by housing sector type.  
26  
27  
28  
29  
30  
31  
32  
33  
34  
35  
36  
37  
38  
39  
40  
41  
42  
43  
44  
45  
46  
47  
48  
49  
50  
51  
52  
53  
54  
55  
56  
57  
58  
59  
60

1  
2  
3 1 Ethical approval  
4

5 2 Full ethical approval was obtained from the relevant Multi-Centre Research Ethics  
6  
7 3 Committee (REC Reference 12/LO/1031). All participants provided written informed  
8  
9 4 consent.  
10

11  
12 5  
13  
14 6 Data sharing statement  
15

16 7 Further details of the ENABLE London study are available from the study website  
17  
18 8 (<http://www.enable.sgul.ac.uk/>). We welcome proposals for collaborative projects. For  
19  
20 9 general data sharing inquiries, contact Professor Owen ([cowen@sgul.ac.uk](mailto:cowen@sgul.ac.uk)).  
21  
22  
23  
24  
25

26 11 Competing interests  
27

28 12 We declare that we have no competing interests.  
29  
30  
31  
32

33 14 Funding  
34

35 15 This research is being supported by project grants from the Medical Research Council  
36  
37 16 National Prevention Research Initiative (MR/J000345/1) and National Institute for Health  
38  
39 17 Research (12/211/69). Diabetes and obesity prevention research at St George's, University  
40  
41 18 of London is supported by the National Institute for Health Research (NIHR) Collaboration  
42  
43 19 for Leadership in Applied Health Research and Care (CLAHRC) South London. AE is funded by  
44  
45 20 the UK Medical Research Council as part of the Neighbourhoods and Communities  
46  
47 21 Programme (MC\_UU\_12017-10). BG-C is supported by an NHMRC Principal Research  
48  
49 22 Fellowship (#1107672). ARC and ASP are supported by NIHR Biomedical Research Centre at  
50  
51 23 University Hospitals Bristol NHS Foundation Trust and the University of Bristol. The views  
52  
53  
54  
55  
56  
57  
58  
59  
60

1  
2  
3  
4  
5  
6  
7  
8  
9  
10  
11  
12  
13  
14  
15  
16  
17  
18  
19  
20  
21  
22  
23  
24  
25  
26  
27  
28  
29  
30  
31  
32  
33  
34  
35  
36  
37  
38  
39  
40  
41  
42  
43  
44  
45  
46  
47  
48  
49  
50  
51  
52  
53  
54  
55  
56  
57  
58  
59  
60

1 expressed in this publication are those of the author(s) and not necessarily those of the  
2 NHS, the National Institute for Health Research or the Department of Health.

### 3 Authorship statement

4 CGO, ARR, AE, ARC, DL, SC, BG-C, DGC and PHW designed the study and raised funding. BR,  
5 ARR, CC, DP and CGO collected data for the study; BR, ARR and CGO enrolled participants.  
6 CMN, BR, ESL, ARR, CC, DP and CGO undertook data management. CMN, ESL analysed the  
7 data; CMN wrote the first draft of the report. ARR, BR, ESL, AS, DP, ARC, ASP, AE, BG-C, CC,  
8 DL, SC, PHW, DGC and CGO critically appraised the manuscript and approved the final draft.  
9 CGO is responsible for data integrity.

### 11 Acknowledgements

12 The authors thank the East Thames Group, Triathlon Homes and Get Living London who  
13 have assisted in recruiting participants into the ENABLE London study. The ENABLE London  
14 study is advised by a Steering Committee chaired by Professor Hazel Inskip (University of  
15 Southampton), with Dr David Ogilvie (University of Cambridge) and Professor Andy Jones  
16 (University of East Anglia) as academic advisors and Mrs Kate Worley (formerly East Thames  
17 Group Assistant Director for Strategic Housing) as the lay/stakeholder member. The authors  
18 are grateful to the members of the ENABLE London study team (in particular Aine Hogan,  
19 Katrin Peuker, Cathy McKay) and to participating households, without whom this study  
20 would not be possible.

21

## Reference List

1. Ford ES, Williamson DF, Liu S. Weight change and diabetes incidence: findings from a national cohort of US adults. *Am J Epidemiol* 1997;146:214-22.
2. Nocon M, Hiemann T, Muller-Riemenschneider F, Thalau F, Roll S, Willich SN. Association of physical activity with all-cause and cardiovascular mortality: a systematic review and meta-analysis. *Eur J Cardiovasc Prev Rehabil* 2008;15:239-46.
3. Shaper AG, Wannamethee SG, Walker M. Body weight: implications for the prevention of coronary heart disease, stroke, and diabetes mellitus in a cohort study of middle aged men. *BMJ* 1997;314:1311-7.
4. Whitlock G, Lewington S, Sherliker P, Clarke R, Emberson J, Halsey J, Qizilbash N, Collins R, Peto R. Body-mass index and cause-specific mortality in 900 000 adults: collaborative analyses of 57 prospective studies. *Lancet* 2009;373:1083-96.
5. Lim SS, Vos T, Flaxman AD, Danaei G, Shibuya K, Adair-Rohani H, Amann M, Anderson HR, Andrews KG, Aryee M et al. A comparative risk assessment of burden of disease and injury attributable to 67 risk factors and risk factor clusters in 21 regions, 1990-2010: a systematic analysis for the Global Burden of Disease Study 2010. *Lancet* 2012;380:2224-60.
6. Craig R, Mindell J. *Health Survey for England 2012: Health, social care and lifestyles*. Health and Social Care Information Centre, Leeds, 2013, 2013.
7. Chinn DJ, White M, Harland J, Drinkwater C, Raybould S. Barriers to physical activity and socioeconomic position: implications for health promotion. *J Epidemiol Community Health* 1999;53:191-2.
8. Beenackers MA, Kamphuis CB, Giskes K, Brug J, Kunst AE, Burdorf A, van Lenthe FJ. Socioeconomic inequalities in occupational, leisure-time, and transport related physical activity among European adults: a systematic review. *Int J Behav Nutr Phys Act* 2012;9:116.
9. McVeigh JA, Winkler EA, Howie EK, Tremblay MS, Smith A, Abbott RA, Eastwood PR, Healy GN, Straker LM. Objectively measured patterns of sedentary time and physical activity in young adults of the Raine study cohort. *Int J Behav Nutr Phys Act* 2016;13:41.
10. Sigmundova D, Sigmund E, Vokacova J, Kopkova J. Parent-child associations in pedometer-determined physical activity and sedentary behaviour on weekdays and weekends in random samples of families in the Czech Republic. *Int J Environ Res Public Health* 2014;11:7163-81.
11. Ellaway A, Macdonald L, Kearns A. Are housing tenure and car access still associated with health? A repeat cross-sectional study of UK adults over a 13-year period. *BMJ Open* 2016;6:e012268.
12. Macintyre S, Hiscock R, Kearns A, Ellaway A. Housing tenure and car access: further exploration of the nature of their relations with health in a UK setting. *J Epidemiol Community Health* 2001;55:330-1.
13. Smith GD, Egger M. Socioeconomic differences in mortality in Britain and the United States. *Am J Public Health* 1992;82:1079-81.

- 1  
2  
3 1 14. Dalstra JA, Kunst AE, Mackenbach JP. A comparative appraisal of the relationship of education,  
4 2 income and housing tenure with less than good health among the elderly in Europe. *Soc Sci*  
5 3 *Med* 2006;62:2046-60.
- 6  
7 4 15. Macintyre S, McKay L, Der G, Hiscock R. Socio-economic position and health: what you observe  
8 5 depends on how you measure it. *J Public Health Med* 2003;25:288-94.
- 9  
10 6 16. Harrison RA, McElduff P, Edwards R. Planning to win: Health and lifestyles associated with  
11 7 physical activity amongst 15,423 adults. *Public Health* 2006;120:206-12.
- 12  
13 8 17. Kendig H, Browning C, Teshuva K. Health actions and social class among older Australians. *Aust*  
14 9 *N Z J Public Health* 1998;22:808-13.
- 15  
16 10 18. Ogilvie D, Mitchell R, Mutrie N, Petticrew M, Platt S. Personal and environmental correlates of  
17 11 active travel and physical activity in a deprived urban population. *Int J Behav Nutr Phys Act*  
18 12 2008;5:43.
- 19  
20 13 19. Boniface DR, Cottee MJ, Neal D, Skinner A. Social and demographic factors predictive of  
21 14 change over seven years in CHD-related behaviours in men aged 18-49 years. *Public Health*  
22 15 2001;115:246-52.
- 23  
24 16 20. Macintyre S, Ellaway A, Hiscock R, Kearns A, Der G, McKay L. What features of the home and  
25 17 the area might help to explain observed relationships between housing tenure and health?  
26 18 Evidence from the west of Scotland. *Health Place* 2003;9:207-18.
- 27  
28 19 21. Ellaway A, Macintyre S. Does housing tenure predict health in the UK because it exposes  
29 20 people to different levels of housing related hazards in the home or its surroundings? *Health*  
30 21 *Place* 1998;4:141-50.
- 31  
32 22 22. Macintyre S, Ellaway A, Der G, Ford G, Hunt K. Do housing tenure and car access predict health  
33 23 because they are simply markers of income or self esteem? A Scottish study. *J Epidemiol*  
34 24 *Community Health* 1998;52:657-64.
- 35  
36 25 23. Hoehner CM, Brennan Ramirez LK, Elliott MB, Handy SL, Brownson RC. Perceived and objective  
37 26 environmental measures and physical activity among urban adults. *Am J Prev Med*  
38 27 2005;28:105-16.
- 39  
40 28 24. Sallis JF, Bowles HR, Bauman A, Ainsworth BE, Bull FC, Craig CL, Sjostrom M, De B, I, Lefevre J,  
41 29 Matsudo V et al. Neighborhood environments and physical activity among adults in 11  
42 30 countries. *Am J Prev Med* 2009;36:484-90.
- 43  
44 31 25. Giles-Corti B, Ryan K, Foster S. Increasing density in Australia: maximising the health benefits  
45 32 and minimising harm.  
46 33 [https://www.heartfoundation.org.au/images/uploads/publications/Increasing-density-in-](https://www.heartfoundation.org.au/images/uploads/publications/Increasing-density-in-Australia-Evidence-Review-2012-trevor.pdf)  
47 34 [Australia-Evidence-Review-2012-trevor.pdf](https://www.heartfoundation.org.au/images/uploads/publications/Increasing-density-in-Australia-Evidence-Review-2012-trevor.pdf) [Accessed August 2017], 2012.
- 48  
49  
50 35 26. Foster S, Giles-Corti B. The built environment, neighborhood crime and constrained physical  
51 36 activity: an exploration of inconsistent findings. *Prev Med* 2008;47:241-51.
- 52  
53 37 27. da Silva IC, Payne VL, Hino AA, Varela AR, Reis RS, Ekelund U, Hallal PC. Physical Activity and  
54 38 Safety From Crime Among Adults: A Systematic Review. *J Phys Act Health* 2016;13:663-70.
- 55  
56  
57  
58  
59  
60

- 1  
2  
3 1 28. Ram B, Nightingale CM, Hudda MT, Kapetanakis VV, Ellaway A, Cooper AR, Page A, Lewis D,  
4 2 Cummins S, Giles-Corti B et al. Cohort profile: Examining Neighbourhood Activities in Built  
5 3 Living Environments in London: the ENABLE London-Olympic Park cohort. *BMJ Open*  
6 4 2016;6:e012643.
- 7  
8 5 29. Ram B, Shankar A, Nightingale CM, Giles-Corti B, Ellaway A, Cooper AR, Page A, Cummins S,  
9 6 Lewis D, Whincup PH et al. Comparisons of depression, anxiety, well-being, and perceptions of  
10 7 the built environment amongst adults seeking social, intermediate and market-rent  
11 8 accommodation in the former London Olympic Athletes' Village. *Health Place* 2017;48:31-9.
- 12  
13 9 30. Mason KE, Baker E, Blakely T, Bentley RJ. Housing affordability and mental health: does the  
14 10 relationship differ for renters and home purchasers? *Soc Sci Med* 2013;94:91-7.
- 15  
16 11 31. Office for National Statistics. The National Statistics Socio-economic Classification User  
17 12 Manual. 2005.
- 18  
19 13 32. Department of Health. Start active, stay active: a report on physical activity from the four  
20 14 home countries Chief Medical Officers. 2011. Department of Health.
- 21  
22 15 33. Freedson PS, Melanson E, Sirard J. Calibration of the Computer Science and Applications, Inc.  
23 16 accelerometer. *Med Sci Sports Exerc* 1998;30:777-81.
- 24  
25 17 34. Harris T, Kerry SM, Limb ES, Victor CR, Iliffe S, Ussher M, Whincup PH, Ekelund U, Fox-Rushby J,  
26 18 Furness C et al. Effect of a Primary Care Walking Intervention with and without Nurse Support  
27 19 on Physical Activity Levels in 45- to 75-Year-Olds: The Pedometer And Consultation Evaluation  
28 20 (PACE-UP) Cluster Randomised Clinical Trial. *PLoS Med* 2017;14:e1002210.
- 29  
30 21 35. Allen MS, Vella SA. Longitudinal determinants of walking, moderate, and vigorous physical  
31 22 activity in Australian adults. *Prev Med* 2015;78:101-4.
- 32  
33 23 36. Juneau CE, Sullivan A, Dodgeon B, Cote S, Ploubidis GB, Potvin L. Social class across the life  
34 24 course and physical activity at age 34 years in the 1970 British birth cohort. *Ann Epidemiol*  
35 25 2014;24:641-7, 647.
- 36  
37 26 37. McLaren L. Socioeconomic status and obesity. *Epidemiol Rev* 2007;29:29-48.
- 38  
39 27 38. Tranter B, Donoghue J. Housing tenure, body mass index and health in Australia. *International*  
40 28 *Journal of Housing Policy* 2016;1:1-20.
- 41  
42 29 39. Turrell G, Haynes M, Wilson LA, Giles-Corti B. Can the built environment reduce health  
43 30 inequalities? A study of neighbourhood socioeconomic disadvantage and walking for  
44 31 transport. *Health Place* 2013;19:89-98.
- 45  
46 32 40. Harrison RA, Gemmell I, Heller RF. The population effect of crime and neighbourhood on  
47 33 physical activity: an analysis of 15,461 adults. *J Epidemiol Community Health* 2007;61:34-9.
- 48  
49 34 41. Brown BB, Werner CM, Smith KR, Tribby CP, Miller HJ. Physical activity mediates the  
50 35 relationship between perceived crime safety and obesity. *Prev Med* 2014;66:140-4.
- 51  
52 36 42. McGinn AP, Evenson KR, Herring AH, Huston SL, Rodriguez DA. Exploring associations between  
53 37 physical activity and perceived and objective measures of the built environment. *J Urban*  
54 38 *Health* 2007;84:162-84.

- 1  
2  
3 1 43. Sarmiento O, Torres A, Jacoby E, Pratt M, Schmid TL, Stierling G. The Ciclovía-Recreativa: A  
4 2 mass-recreational program with public health potential. *J Phys Act Health* 2010;7 Suppl  
5 3 2:S163-S180.  
6  
7 4 44. Hipp JA, Eyster AA, Zieff SG, Samuelson MA. Taking physical activity to the streets: the  
8 5 popularity of Ciclovía and Open Streets initiatives in the United States. *Am J Health Promot*  
9 6 2014;28:S114-S115.  
10  
11 7 45. Santos-Lozano A, Santin-Medeiros F, Cardon G, Torres-Luque G, Bailon R, Bergmeir C, Ruiz JR,  
12 8 Lucia A, Garatachea N. Actigraph GT3X: validation and determination of physical activity  
13 9 intensity cut points. *Int J Sports Med* 2013;34:975-82.  
14  
15 10 46. Deurenberg P, Yap M, van Staveren WA. Body mass index and percent body fat: a meta  
16 11 analysis among different ethnic groups. *Int J Obes Relat Metab Disord* 1998;22:1164-71.  
17  
18 12 47. Gallagher D, Visser M, Sepulveda D, Pierson RN, Harris T, Heymsfield SB. How useful is body  
19 13 mass index for comparison of body fatness across age, sex, and ethnic groups? *Am J Epidemiol*  
20 14 1996;143:228-39.  
21  
22 15 48. Hayes L, White M, Unwin N, Bhopal R, Fischbacher C, Harland J, Alberti KG. Patterns of physical  
23 16 activity and relationship with risk markers for cardiovascular disease and diabetes in Indian,  
24 17 Pakistani, Bangladeshi and European adults in a UK population. *J Public Health Med*  
25 18 2002;24:170-8.  
26  
27 19 49. Health and Social Care Information Centre. Health Survey for England 2004: The health of  
28 20 ethnic minority groups. Sproston, K. and Mindell, J. 2006. The Information Centre.  
29  
30 21 50. Health and Social Care Information Centre. Health Survey for England - 2008: Physical activity  
31 22 and fitness. Craig R, Mindell J, and Hirani V. 2009. NHS Digital.  
32  
33 23 51. Global BMI Mortality Collaboration, Di AE, Bhupathiraju S, Wormser D, Gao P, Kaptoge S,  
34 24 Berrington de GA, Cairns BJ, Huxley R, Jackson C et al. Body-mass index and all-cause mortality:  
35 25 individual-participant-data meta-analysis of 239 prospective studies in four continents. *Lancet*  
36 26 2016;388:776-86.  
37 27  
38  
39  
40  
41  
42  
43  
44  
45  
46  
47  
48  
49  
50  
51  
52  
53  
54  
55  
56  
57  
58  
59  
60



1  
2  
3  
4 1 Table 1: Associations between adiposity and physical activity outcomes and patient characteristics  
5 2

|                           |      | Difference or % difference* in adiposity/physical activity (95% CI), p-value |              |         |            |              |         |              |               |         |                              |               |         |                                                  |               |         |
|---------------------------|------|------------------------------------------------------------------------------|--------------|---------|------------|--------------|---------|--------------|---------------|---------|------------------------------|---------------|---------|--------------------------------------------------|---------------|---------|
| n                         |      | BMI (kg/m <sup>2</sup> )*                                                    |              |         | Fat mass % |              |         | Daily steps† |               |         | Daily minutes spent in MVPA† |               |         | Daily minutes spent in MVPA in ≥10 minute bouts† |               |         |
| <b>Sex</b>                |      |                                                                              |              |         |            |              |         |              |               |         |                              |               |         |                                                  |               |         |
| Male (Ref)                | 522  | -                                                                            |              |         | -          |              |         | -            |               |         | -                            |               |         | -                                                |               |         |
| Female                    | 718  | -1.2                                                                         | (-3.2, 0.9)  | 0.26    | 11.1       | (10.3, 12.0) | <0.0001 | -570         | (-946, -194)  | 0.003   | -9.3                         | (-12.2, -6.4) | <0.0001 | -4.1                                             | (-6.1, -2.0)  | <0.001  |
| <b>Age group</b>          |      |                                                                              |              |         |            |              |         |              |               |         |                              |               |         |                                                  |               |         |
| Age 16-24 (Ref)           | 269  | -                                                                            |              |         | -          |              |         | -            |               |         | -                            |               |         | -                                                |               |         |
| Age 25-34                 | 531  | 6.3                                                                          | (3.5, 9.1)   | <0.0001 | 3.2        | (2.1, 4.3)   | <0.0001 | 502          | (11, 992)     | 0.04    | 4.0                          | (0.2, 7.9)    | 0.04    | 1.0                                              | (-1.9, 3.8)   | 0.51    |
| Age 35-49                 | 358  | 13.4                                                                         | (10.2, 16.6) | <0.0001 | 6.4        | (5.2, 7.6)   | <0.0001 | 699          | (173, 1224)   | 0.01    | 3.9                          | (-0.2, 8.0)   | 0.07    | -1.1                                             | (-4.0, 1.8)   | 0.46    |
| Age 50+                   | 82   | 17.6                                                                         | (12.6, 22.9) | <0.0001 | 9.2        | (7.3, 11.0)  | <0.0001 | -9           | (-832, 813)   | 0.98    | -6.0                         | (-12.4, 0.5)  | 0.07    | -2.0                                             | (-6.8, 2.7)   | 0.40    |
| <b>Ethnic group</b>       |      |                                                                              |              |         |            |              |         |              |               |         |                              |               |         |                                                  |               |         |
| White (Ref)               | 595  | -                                                                            |              |         | -          |              |         | -            |               |         | -                            |               |         | -                                                |               |         |
| Black                     | 314  | 6.2                                                                          | (3.3, 9.3)   | <0.0001 | 3.6        | (2.4, 4.8)   | <0.0001 | -1116        | (-1657, -575) | <0.0001 | -7.4                         | (-11.7, -3.2) | <0.001  | -6.6                                             | (-9.8, -3.4)  | <0.0001 |
| Asian                     | 210  | -0.3                                                                         | (-3.1, 2.7)  | 0.85    | 0.02       | (-1.2, 1.3)  | 0.97    | -1409        | (-1972, -845) | <0.0001 | -11.5                        | (-15.9, -7.0) | <0.0001 | -8.1                                             | (-11.4, -4.8) | <0.0001 |
| Other/Mixed               | 121  | 1.3                                                                          | (-2.3, 5.0)  | 0.48    | 1.0        | (-0.5, 2.5)  | 0.18    | -430         | (-1100, 239)  | 0.21    | -4.6                         | (-9.8, 0.7)   | 0.09    | -4.0                                             | (-7.9, -0.04) | 0.05    |
| <b>Limiting illness</b>   |      |                                                                              |              |         |            |              |         |              |               |         |                              |               |         |                                                  |               |         |
| No (Ref)                  | 1087 | -                                                                            |              |         | -          |              |         | -            |               |         | -                            |               |         | -                                                |               |         |
| Yes                       | 153  | 4.3                                                                          | (1.1, 7.5)   | 0.01    | 1.6        | (0.3, 2.9)   | 0.01    | -1081        | (-1666, -496) | <0.001  | -5.7                         | (-10.3, -1.1) | 0.01    | -2.8                                             | (-6.1, 0.5)   | 0.10    |
| <b>Housing sector</b>     |      |                                                                              |              |         |            |              |         |              |               |         |                              |               |         |                                                  |               |         |
| Social Intermediate (Ref) | 512  | -                                                                            |              |         | -          |              |         | -            |               |         | -                            |               |         | -                                                |               |         |
| Market-rent               | 503  | 5.0                                                                          | (2.2, 7.8)   | <0.001  | 2.7        | (1.5, 3.8)   | <0.0001 | -1125        | (-1629, -620) | <0.0001 | -7.5                         | (-11.5, -3.6) | <0.001  | -6.5                                             | (-9.5, -3.5)  | <0.0001 |
| Market-rent               | 225  | -0.8                                                                         | (-3.6, 2.0)  | 0.57    | -0.2       | (-1.4, 1.0)  | 0.70    | -104         | (-633, 424)   | 0.70    | 2.3                          | (-1.9, 6.4)   | 0.29    | 2.8                                              | (-0.3, 6.0)   | 0.08    |

33 3  
34 4 \* Percentage differences are presented for BMI, which was log-transformed for analysis

35 5 All differences and % differences are mutually adjusted for sex, age group, ethnic group, limiting longstanding illness, housing sector and a random effect to allow for clustering at household level

36 6  
37 7 † Missing data for 133 participants

38 8 MVPA and MVPA in ≥10 minute bouts are an average daily estimate, obtained from averaging a participant's weekly total.

Table 2: Associations between adiposity and physical activity outcomes and neighbourhood perceptions scales

|                                          | Difference or % difference* in outcome between the highest and lowest quintiles for each neighbourhood scale (95% CI), p-value |              |      |                         |             |      |
|------------------------------------------|--------------------------------------------------------------------------------------------------------------------------------|--------------|------|-------------------------|-------------|------|
|                                          | Perceptions of NH quality                                                                                                      |              |      | Perceptions of NH crime |             |      |
| <b>Adiposity (N = 1240)</b>              |                                                                                                                                |              |      |                         |             |      |
| Body mass index (kg/m <sup>2</sup> )*    | -3.6                                                                                                                           | (-6.5, -0.6) | 0.02 | -2.1                    | (-5.4, 1.3) | 0.21 |
| Fat mass %                               | -1.2                                                                                                                           | (-2.5, 0.06) | 0.06 | -0.8                    | (-2.2, 0.7) | 0.30 |
| <b>Physical activity (N = 1107)</b>      |                                                                                                                                |              |      |                         |             |      |
| Daily steps                              | 677                                                                                                                            | (108, 1247)  | 0.02 | -63                     | (-713, 587) | 0.85 |
| Daily MVPA (minutes)                     | 4.5                                                                                                                            | (0.02, 9.0)  | 0.05 | 1.1                     | (-4.0, 6.2) | 0.68 |
| Daily MVPA in ≥10 minute bouts (minutes) | 2.7                                                                                                                            | (-0.6, 6.0)  | 0.11 | 2.4                     | (-1.4, 6.1) | 0.22 |

\* Percentage differences are presented for BMI, which was log-transformed for analysis

All differences and % differences are adjusted for sex, age group, ethnic group, limiting longstanding illness, housing sector and a random effect to allow for clustering at household level.

Abbreviations: NH, neighbourhood

MVPA and MVPA in ≥10 minute bouts are an average daily estimate, obtained from averaging a participant’s weekly total.

1  
2  
3  
4 1 Table 3: Adiposity and physical activity differences between housing sectors: adjustment for perceptions of neighbourhood quality  
5 2

| Housing sector group                     |              | Difference or % difference* compared to intermediate housing group (95% confidence interval), p-value |               |                                                                 |       |               |         |
|------------------------------------------|--------------|-------------------------------------------------------------------------------------------------------|---------------|-----------------------------------------------------------------|-------|---------------|---------|
|                                          |              | Model 1                                                                                               |               | Model 2 (Additionally adjusted for neighbourhood quality scale) |       |               |         |
| Adiposity (N = 1240)                     |              |                                                                                                       |               |                                                                 |       |               |         |
| Body mass index (kg/m <sup>2</sup> )*    | Social       | 5.0                                                                                                   | (2.2, 7.8)    | <0.001                                                          | 4.5   | (1.7, 7.3)    | 0.002   |
|                                          | Intermediate | Reference group                                                                                       |               |                                                                 |       |               |         |
|                                          | Market rent  | -0.8                                                                                                  | (-3.6, 2.0)   | 0.57                                                            | -0.9  | (-3.6, 2.0)   | 0.55    |
| Fat mass %                               | Social       | 2.7                                                                                                   | (1.5, 3.8)    | <0.0001                                                         | 2.5   | (1.4, 3.6)    | <0.0001 |
|                                          | Intermediate | Reference group                                                                                       |               |                                                                 |       |               |         |
|                                          | Market rent  | -0.2                                                                                                  | (-1.4, 1.0)   | 0.70                                                            | -0.2  | (-1.4, 0.9)   | 0.68    |
| Physical activity (N = 1107)             |              |                                                                                                       |               |                                                                 |       |               |         |
| Daily steps                              | Social       | -1125                                                                                                 | (-1629, -620) | <0.0001                                                         | -1016 | (-1531, -501) | <0.001  |
|                                          | Intermediate | Reference group                                                                                       |               |                                                                 |       |               |         |
|                                          | Market rent  | -104                                                                                                  | (-633, 424)   | 0.70                                                            | -96   | (-624, 431)   | 0.72    |
| Daily MVPA (minutes)                     | Social       | -7.5                                                                                                  | (-11.5, -3.6) | <0.001                                                          | -6.8  | (-10.8, -2.7) | 0.001   |
|                                          | Intermediate | Reference group                                                                                       |               |                                                                 |       |               |         |
|                                          | Market rent  | 2.3                                                                                                   | (-1.9, 6.4)   | 0.29                                                            | 2.3   | (-1.8, 6.5)   | 0.27    |
| Daily MVPA in ≥10 minute bouts (minutes) | Social       | -6.5                                                                                                  | (-9.5, -3.5)  | <0.0001                                                         | -6.0  | (-9.1, -3.0)  | <0.001  |
|                                          | Intermediate | Reference group                                                                                       |               |                                                                 |       |               |         |
|                                          | Market rent  | 2.8                                                                                                   | (-0.3, 6.0)   | 0.08                                                            | 2.8   | (-0.3, 6.0)   | 0.08    |

3  
4 \* Percentage differences are presented for BMI, which was log-transformed for analysis

5 Model 1: Adjusted for sex, age group, ethnic group, limiting longstanding illness and clustering at household level (random effect)

6 Model 2: Adjusted as Model 1 plus neighbourhood quality scale (added as a continuous variable)

7 MVPA and MVPA in ≥10 minute bouts are an average daily estimate, obtained from averaging a participant's weekly total.

1  
2  
3  
4  
5  
6  
7  
8  
9  
10  
11  
12  
13  
14  
15  
16  
17  
18  
19  
20  
21  
22  
23  
24  
25  
26  
27  
28  
29  
30  
31  
32  
33  
34  
35  
36  
37  
38  
39  
40  
41  
42  
43  
44  
45  
46  
47

1 Figure 1: Daily physical activity by day of the week and housing sector group: N = 6206 days from 1107 participants

2

3

4 Means and 95% confidence intervals are adjusted for sex, age group, ethnic group, limiting longstanding illness, month of recording, day order of recording, day of week, housing  
5 sector, an interaction between housing sector and day of week and random effects to allow for multiple days of measurement and clustering of participants within households

6

7

8

For peer review only

1  
2  
3  
4  
5  
6  
7  
8  
9  
10  
11  
12  
13  
14  
15  
16  
17  
18  
19  
20  
21  
22  
23  
24  
25  
26  
27  
28  
29  
30  
31  
32  
33  
34  
35  
36  
37  
38  
39  
40  
41  
42  
43  
44  
45  
46  
47

1

For peer review only

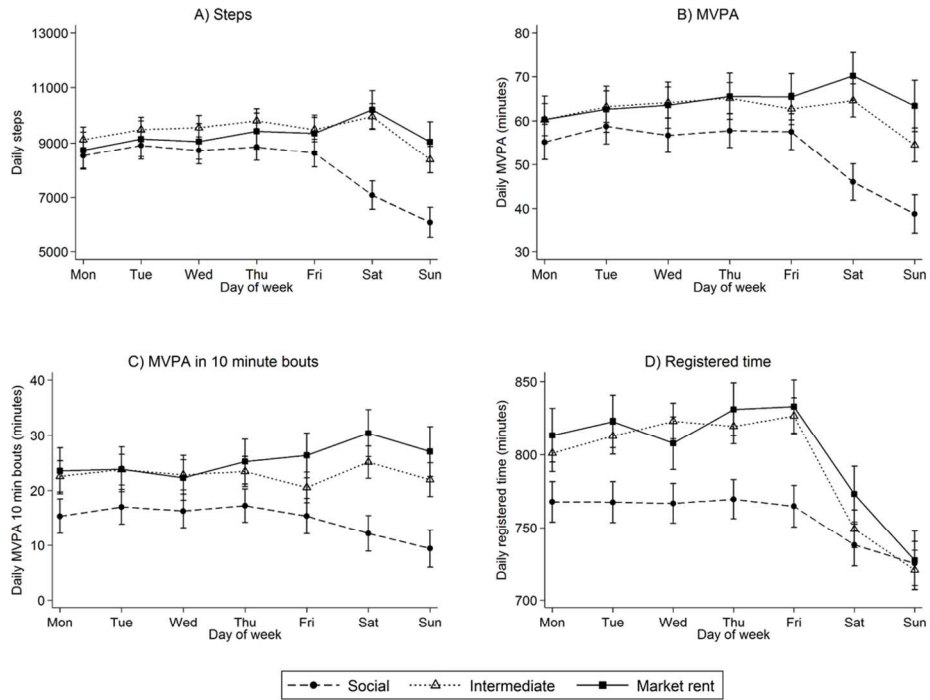

Figure 1: Daily physical activity by day of the week and housing sector group: N = 6206 days from 1107 participants

119x90mm (300 x 300 DPI)

**Supplementary Table 1: Questionnaire items included in the factor analysis on perceptions of the neighbourhood**

---

**Perceptions of neighbourhood crime items**

---

There is a lot of crime in my neighbourhood.

The level of crime in my neighbourhood makes it unsafe to walk on the streets at night.

There are threatening groups of young people in my neighbourhood.

The level of crime in my neighbourhood makes it unsafe to walk on the streets during the day.

Vandalism, graffiti or deliberate damage to property is a problem in my local area.

---

**Perceptions of neighbourhood quality items**

---

I enjoy walking in my neighbourhood.

This area is a place I enjoy living in.

My neighbourhood is attractive to look at (e.g. there are attractive buildings, green space. Landscaping views).

This area has good leisure things for people like myself, leisure centres or community centres for example.

You often see people out on walks or riding their bicycles in my neighbourhood.

This area has good local transport.

---

**Additional items included in the factor analysis with factor loadings below 0.4 and were therefore not included in the solution**

---

My neighbourhood is generally free from litter.

There is too much traffic in my neighbourhood.

Our neighbourhood streets have good lighting at night.

---

Participants were asked to select a response from the following for all questionnaire items stated in the table: Strongly agree, Agree, Neither agree nor disagree, Disagree, Strongly disagree

**Supplementary Table 2: Participant characteristics for 1240 adults with measurements of adiposity at baseline**

|                                  | Social<br>(n = 512) | Housing sector<br>Intermediate<br>(n = 503) | Market rent<br>(n = 225) | Total<br>(N = 1240) | p ( $\chi^2$ ) |
|----------------------------------|---------------------|---------------------------------------------|--------------------------|---------------------|----------------|
| <b>Sex</b>                       |                     |                                             |                          |                     |                |
| Male                             | 137 (26.8%)         | 259 (51.5%)                                 | 126 (56.0%)              | 522 (42.1%)         |                |
| Female                           | 375 (73.2%)         | 244 (48.5%)                                 | 99 (44.0%)               | 718 (57.9%)         | <0.0001        |
| <b>Age group</b>                 |                     |                                             |                          |                     |                |
| 16-24                            | 107 (20.9%)         | 92 (18.3%)                                  | 70 (31.1%)               | 269 (21.7%)         |                |
| 25-34                            | 129 (25.2%)         | 291 (57.9%)                                 | 111 (49.3%)              | 531 (42.8%)         |                |
| 35-49                            | 233 (45.5%)         | 102 (20.3%)                                 | 23 (10.2%)               | 358 (28.9%)         |                |
| 50+                              | 43 (8.4%)           | 18 (3.6%)                                   | 21 (9.3%)                | 82 (6.6%)           | <0.0001        |
| <b>Ethnic group</b>              |                     |                                             |                          |                     |                |
| White                            | 96 (18.8%)          | 342 (68.0%)                                 | 157 (69.8%)              | 595 (48.0%)         |                |
| Black                            | 245 (47.9%)         | 53 (10.5%)                                  | 16 (7.1%)                | 314 (25.3%)         |                |
| Asian                            | 107 (20.9%)         | 75 (14.9%)                                  | 28 (12.4%)               | 210 (16.9%)         |                |
| Mixed/Other                      | 64 (12.5%)          | 33 (6.6%)                                   | 24 (10.7%)               | 121 (9.8%)          | <0.0001        |
| <b>NS-SEC*</b>                   |                     |                                             |                          |                     |                |
| Higher Managerial / Professional | 60 (11.9%)          | 357 (71.4%)                                 | 150 (66.7%)              | 567 (46.1%)         |                |
| Intermediate Occupations         | 62 (12.3%)          | 77 (15.4%)                                  | 38 (16.9%)               | 177 (14.4%)         |                |
| Routine / Manual                 | 125 (24.8%)         | 34 (6.8%)                                   | 10 (4.4%)                | 169 (13.7%)         |                |
| Economically inactive            | 258 (51.1%)         | 32 (6.4%)                                   | 27 (12.0%)               | 317 (25.8%)         | <0.0001        |
| <b>Limiting illness</b>          |                     |                                             |                          |                     |                |
| Yes                              | 102 (19.9%)         | 40 (8.0%)                                   | 11 (4.9%)                | 153 (12.3%)         |                |
| No                               | 410 (80.1%)         | 463 (92.0%)                                 | 214 (95.1%)              | 1087 (87.7%)        | <0.0001        |

p ( $\chi^2$ ): p-value for Chi-squared test

\* 10 responses missing for NS-SEC group



**Supplementary Table 3: Mean levels of adiposity and physical activity by patient characteristics**

|                         |      | Mean/Geometric mean* levels adiposity and physical activity (95% confidence intervals) |              |            |              |              |              |                        |              |      |              |
|-------------------------|------|----------------------------------------------------------------------------------------|--------------|------------|--------------|--------------|--------------|------------------------|--------------|------|--------------|
| n                       |      | BMI (kg/m <sup>2</sup> )*                                                              |              | Fat mass % |              | Daily steps† |              | Daily minutes of MVPA† |              |      |              |
| <b>Sex</b>              |      |                                                                                        |              |            |              |              |              |                        |              |      |              |
| Male                    | 522  | 25.4                                                                                   | (25.0, 25.8) | 20.4       | (19.7, 21.0) | 9279         | (8991, 9568) | 64.8                   | (62.6, 67.1) | 22.8 | (21.1, 24.4) |
| Female                  | 718  | 25.1                                                                                   | (24.8, 25.5) | 31.5       | (30.9, 32.0) | 8709         | (8464, 8954) | 55.6                   | (53.6, 57.5) | 18.7 | (17.3, 20.1) |
| <b>Age group</b>        |      |                                                                                        |              |            |              |              |              |                        |              |      |              |
| Age 16-24               | 269  | 23.5                                                                                   | (23.0, 24.0) | 23.0       | (22.1, 23.9) | 8534         | (8136, 8932) | 57.0                   | (53.9, 60.2) | 20.5 | (18.2, 22.8) |
| Age 25-34               | 531  | 25.0                                                                                   | (24.6, 25.3) | 26.2       | (25.5, 26.8) | 9035         | (8744, 9326) | 61.1                   | (58.8, 63.3) | 21.4 | (19.7, 23.1) |
| Age 35-49               | 358  | 26.6                                                                                   | (26.1, 27.1) | 29.3       | (28.5, 30.1) | 9232         | (8879, 9585) | 60.9                   | (58.1, 63.6) | 19.4 | (17.3, 21.4) |
| Age 50+                 | 82   | 27.6                                                                                   | (26.6, 28.7) | 32.2       | (30.5, 33.8) | 8525         | (7800, 9249) | 51.1                   | (45.4, 56.7) | 18.4 | (14.2, 22.7) |
| <b>Ethnic group</b>     |      |                                                                                        |              |            |              |              |              |                        |              |      |              |
| White                   | 595  | 24.9                                                                                   | (24.5, 25.2) | 25.8       | (25.1, 26.4) | 9491         | (9203, 9779) | 63.6                   | (61.3, 65.8) | 23.7 | (22.0, 25.4) |
| Black                   | 314  | 26.4                                                                                   | (25.8, 27.0) | 29.4       | (28.5, 30.3) | 8375         | (7961, 8789) | 56.2                   | (52.9, 59.4) | 17.1 | (14.7, 19.6) |
| Asian                   | 210  | 24.8                                                                                   | (24.2, 25.4) | 25.8       | (24.8, 26.8) | 8082         | (7608, 8556) | 52.1                   | (48.4, 55.8) | 15.6 | (12.8, 18.4) |
| Other/Mixed             | 121  | 25.2                                                                                   | (24.4, 26.0) | 26.8       | (25.5, 28.1) | 9060         | (8465, 9656) | 59.0                   | (54.3, 63.7) | 19.8 | (16.3, 23.3) |
| <b>Limiting illness</b> |      |                                                                                        |              |            |              |              |              |                        |              |      |              |
| No                      | 1087 | 25.1                                                                                   | (24.9, 25.4) | 26.6       | (26.1, 27.0) | 9077         | (8877, 9277) | 60.1                   | (58.6, 61.7) | 20.8 | (19.6, 21.9) |
| Yes                     | 153  | 26.2                                                                                   | (25.5, 27.0) | 28.2       | (27.0, 29.4) | 7996         | (7447, 8545) | 54.4                   | (50.1, 58.7) | 18.0 | (14.8, 21.1) |
| <b>Housing sector</b>   |      |                                                                                        |              |            |              |              |              |                        |              |      |              |
| Social                  | 512  | 26.0                                                                                   | (25.6, 26.5) | 28.4       | (27.6, 29.1) | 8298         | (7953, 8642) | 54.6                   | (51.8, 57.3) | 16.0 | (14.0, 18.1) |
| Intermediate            | 503  | 24.8                                                                                   | (24.4, 25.2) | 25.7       | (25.0, 26.4) | 9422         | (9110, 9735) | 62.1                   | (59.6, 64.5) | 22.5 | (20.6, 24.4) |
| Market-rent             | 225  | 24.6                                                                                   | (24.0, 25.2) | 25.5       | (24.5, 26.5) | 9318         | (8863, 9773) | 64.3                   | (60.8, 67.9) | 25.3 | (22.6, 28.1) |

\* Geometric means are presented for BMI

All means/geometric means are adjusted for sex, age group, ethnic group, limiting longstanding illness, housing sector and a random effect to allow for clustering at household level.

† Data missing for 133 participants for average daily steps, MVPA and MVPA in bouts

**Supplementary Table 4: Associations between participant characteristics and physical activity variables in participants with at least 4 days of recording of physical activity data**

|                         | n   | Difference or % difference* in physical activity variable (95% confidence interval), p-value |               |         |                             |               |         |                                                 |               |         |
|-------------------------|-----|----------------------------------------------------------------------------------------------|---------------|---------|-----------------------------|---------------|---------|-------------------------------------------------|---------------|---------|
|                         |     | Daily steps                                                                                  |               |         | Daily minutes spent in MVPA |               |         | Daily minutes spent in MVPA in ≥10 minute bouts |               |         |
| <b>Sex</b>              |     |                                                                                              |               |         |                             |               |         |                                                 |               |         |
| Male (Ref)              | 402 | -                                                                                            | -             | -       | -                           | -             | -       | -                                               | -             |         |
| Female                  | 529 | -559                                                                                         | (-947, -172)  | 0.005   | -9.7                        | (-12.7, -6.7) | <0.0001 | -4.7                                            | (-6.8, -2.5)  | <0.0001 |
| <b>Age group</b>        |     |                                                                                              |               |         |                             |               |         |                                                 |               |         |
| Age 16-24 (Ref)         | 180 | -                                                                                            | -             | -       | -                           | -             | -       | -                                               | -             |         |
| Age 25-34               | 412 | 410                                                                                          | (-116, 936)   | 0.13    | 3.0                         | (-1.2, 7.2)   | 0.16    | -0.3                                            | (-3.3, 2.8)   | 0.87    |
| Age 35-49               | 276 | 520                                                                                          | (-45, 1086)   | 0.07    | 2.5                         | (-2.0, 6.9)   | 0.27    | -2.5                                            | (-5.7, 0.7)   | 0.12    |
| Age 50+                 | 63  | -25                                                                                          | (-889, 838)   | 0.95    | -7.9                        | (-14.8, -1.1) | 0.02    | -3.2                                            | (-8.2, 1.8)   | 0.20    |
| <b>Ethnic group</b>     |     |                                                                                              |               |         |                             |               |         |                                                 |               |         |
| White (Ref)             | 482 | -                                                                                            | -             | -       | -                           | -             | -       | -                                               | -             |         |
| Black                   | 214 | -1213                                                                                        | (-1789, -638) | <0.0001 | -7.1                        | (-11.7, -2.5) | 0.002   | -6.5                                            | (-9.9, -3.1)  | <0.001  |
| Asian                   | 142 | -1128                                                                                        | (-1719, -538) | <0.001  | -10.3                       | (-15.0, -5.6) | <0.0001 | -7.8                                            | (-11.3, -4.3) | <0.0001 |
| Other/Mixed             | 93  | -582                                                                                         | (-1273, 110)  | 0.10    | -4.7                        | (-10.2, 0.8)  | 0.09    | -4.2                                            | (-8.2, -0.2)  | 0.04    |
| <b>Limiting illness</b> |     |                                                                                              |               |         |                             |               |         |                                                 |               |         |
| No (Ref)                | 834 | -                                                                                            | -             | -       | -                           | -             | -       | -                                               | -             |         |
| Yes                     | 97  | -976                                                                                         | (-1612, -341) | 0.003   | -4.6                        | (-9.6, 0.4)   | 0.07    | -2.0                                            | (-5.6, 1.6)   | 0.28    |
| <b>Housing sector</b>   |     |                                                                                              |               |         |                             |               |         |                                                 |               |         |
| Social                  | 332 | -978                                                                                         | (-1515, -440) | <0.001  | -6.9                        | (-11.2, -2.6) | 0.002   | -7.2                                            | (-10.4, -4.0) | <0.0001 |
| Intermediate (Ref)      | 410 | -                                                                                            | -             | -       | -                           | -             | -       | -                                               | -             |         |
| Market-rent             | 189 | -359                                                                                         | (-889, 171)   | 0.185   | 0.2                         | (-4.0, 4.3)   | 0.91    | 0.9                                             | (-2.2, 4.1)   | 0.56    |

All differences are mutually adjusted for sex, age group, ethnic group, limiting longstanding illness, housing sector and a random effect to allow for clustering at household level.

MVPA and MVPA in ≥10 minute bouts are an average daily estimate, obtained from averaging a participant’s weekly total.

**Supplementary Table 5: Physical activity differences between weekday (Monday-Friday) and weekend (Saturday, Sunday) activity by housing sector.**

| Physical activity variable (N = 1107) | Housing sector group | Mean (95% CI) weekday (Mon-Fri) activity |              | Difference in PA outcome compared to weekdays (95% confidence interval), p-value |                |         |                  |                |         |
|---------------------------------------|----------------------|------------------------------------------|--------------|----------------------------------------------------------------------------------|----------------|---------|------------------|----------------|---------|
|                                       |                      |                                          |              | Saturday - weekday                                                               |                |         | Sunday - weekday |                |         |
|                                       |                      |                                          |              | Mean                                                                             | 95% CI         | p-value | Mean             | 95% CI         | p-value |
| Daily steps                           | Social               | 8733                                     | (8364, 9103) | -1643                                                                            | (-2078, -1207) | <0.0001 | -2629            | (-3093, -2164) | <0.0001 |
|                                       | Intermediate         | 9497                                     | (9178, 9817) | 460                                                                              | (59, 862)      | 0.02    | -1104            | (-1528, -680)  | <0.0001 |
|                                       | Market-rent          | 9146                                     | (8673, 9619) | 1055                                                                             | (467, 1642)    | <0.001  | -102             | (-734, 531)    | 0.75    |
| MVPA (minutes)                        | Social               | 57.2                                     | (54.3, 60.1) | -11.2                                                                            | (-14.7, -7.7)  | <0.0001 | -18.4            | (-22.1, -14.7) | <0.0001 |
|                                       | Intermediate         | 63.1                                     | (60.6, 65.7) | 1.5                                                                              | (-1.8, 4.7)    | 0.37    | -8.5             | (-11.9, -5.1)  | <0.0001 |
|                                       | Market-rent          | 63.5                                     | (59.8, 67.3) | 6.6                                                                              | (1.9, 11.3)    | 0.01    | -0.1             | (-5.2, 5.0)    | 0.97    |
| MVPA in ≥10 minute bouts (minutes)    | Social               | 16.3                                     | (14.0, 18.5) | -4.1                                                                             | (-6.9, -1.3)   | 0.004   | -6.8             | (-9.8, -3.9)   | <0.0001 |
|                                       | Intermediate         | 22.6                                     | (20.7, 24.6) | 2.5                                                                              | (-0.06, 5.1)   | 0.06    | -0.7             | (-3.4, 2.0)    | 0.62    |
|                                       | Market-rent          | 24.2                                     | (21.3, 27.1) | 6.1                                                                              | (2.4, 9.9)     | 0.001   | 2.8              | (-1.2, 6.9)    | 0.17    |

Means and differences (95% confidence intervals) are adjusted for sex, age group, ethnic group, limiting longstanding illness, month of recording, day of the week, housing sector, an interaction between housing sector and day of week, and random effects to allow for multiple days of measurement and clustering of participants within household.

MVPA and MVPA in ≥10 minute bouts are an average daily estimate, obtained from averaging a participant's weekly total.

## STROBE Statement—checklist of items that should be included in reports of observational studies

|                              | Item No | Recommendation                                                                                                                                                                                                                                                                                                                                                                                                                                                         | Page / line number at first call out |
|------------------------------|---------|------------------------------------------------------------------------------------------------------------------------------------------------------------------------------------------------------------------------------------------------------------------------------------------------------------------------------------------------------------------------------------------------------------------------------------------------------------------------|--------------------------------------|
| <b>Title and abstract</b>    | 1       | (a) Indicate the study's design with a commonly used term in the title or the abstract                                                                                                                                                                                                                                                                                                                                                                                 | 2 / 7                                |
|                              |         | (b) Provide in the abstract an informative and balanced summary of what was done and what was found                                                                                                                                                                                                                                                                                                                                                                    | 2 / 2                                |
| <b>Introduction</b>          |         |                                                                                                                                                                                                                                                                                                                                                                                                                                                                        |                                      |
| Background/rationale         | 2       | Explain the scientific background and rationale for the investigation being reported                                                                                                                                                                                                                                                                                                                                                                                   | 5 / 9                                |
| Objectives                   | 3       | State specific objectives, including any prespecified hypotheses                                                                                                                                                                                                                                                                                                                                                                                                       | 6 / 7                                |
| <b>Methods</b>               |         |                                                                                                                                                                                                                                                                                                                                                                                                                                                                        |                                      |
| Study design                 | 4       | Present key elements of study design early in the paper                                                                                                                                                                                                                                                                                                                                                                                                                | 6 / 16                               |
| Setting                      | 5       | Describe the setting, locations, and relevant dates, including periods of recruitment, exposure, follow-up, and data collection                                                                                                                                                                                                                                                                                                                                        | 7 / 4                                |
| Participants                 | 6       | (a) <i>Cohort study</i> —Give the eligibility criteria, and the sources and methods of selection of participants. Describe methods of follow-up<br><i>Case-control study</i> —Give the eligibility criteria, and the sources and methods of case ascertainment and control selection. Give the rationale for the choice of cases and controls<br><i>Cross-sectional study</i> —Give the eligibility criteria, and the sources and methods of selection of participants | 6 / 18                               |
|                              |         | (b) <i>Cohort study</i> —For matched studies, give matching criteria and number of exposed and unexposed<br><i>Case-control study</i> —For matched studies, give matching criteria and the number of controls per case                                                                                                                                                                                                                                                 |                                      |
| Variables                    | 7       | Clearly define all outcomes, exposures, predictors, potential confounders, and effect modifiers. Give diagnostic criteria, if applicable                                                                                                                                                                                                                                                                                                                               | 8 / 5                                |
| Data sources/<br>measurement | 8*      | For each variable of interest, give sources of data and details of methods of assessment (measurement). Describe comparability of assessment methods if there is more than one group                                                                                                                                                                                                                                                                                   | 8 / 5                                |
| Bias                         | 9       | Describe any efforts to address potential sources of bias                                                                                                                                                                                                                                                                                                                                                                                                              | 10 / 14                              |
| Study size                   | 10      | Explain how the study size was arrived at                                                                                                                                                                                                                                                                                                                                                                                                                              | 11 / 22                              |
| Quantitative variables       | 11      | Explain how quantitative variables were handled in the analyses. If applicable, describe which groupings were chosen and why                                                                                                                                                                                                                                                                                                                                           | 8 / 6                                |
| Statistical methods          | 12      | (a) Describe all statistical methods, including those used to control for confounding                                                                                                                                                                                                                                                                                                                                                                                  | 10 / 8                               |
|                              |         | (b) Describe any methods used to examine subgroups and interactions                                                                                                                                                                                                                                                                                                                                                                                                    | 10 / 12                              |
|                              |         | (c) Explain how missing data were addressed                                                                                                                                                                                                                                                                                                                                                                                                                            | Table 1                              |
|                              |         | (d) <i>Cohort study</i> —If applicable, explain how loss to follow-up was addressed<br><i>Case-control study</i> —If applicable, explain how matching of cases                                                                                                                                                                                                                                                                                                         | 10 / 8                               |

|                          |     |                                                                                                                                                                                                              |         |
|--------------------------|-----|--------------------------------------------------------------------------------------------------------------------------------------------------------------------------------------------------------------|---------|
|                          |     | and controls was addressed                                                                                                                                                                                   |         |
|                          |     | <i>Cross-sectional study</i> —If applicable, describe analytical methods taking account of sampling strategy                                                                                                 |         |
|                          |     | (e) Describe any sensitivity analyses                                                                                                                                                                        | 10 / 14 |
| <b>Results</b>           |     |                                                                                                                                                                                                              |         |
| Participants             | 13* | (a) Report numbers of individuals at each stage of study—eg numbers potentially eligible, examined for eligibility, confirmed eligible, included in the study, completing follow-up, and analysed            | 11 / 22 |
|                          |     | (b) Give reasons for non-participation at each stage                                                                                                                                                         | 19 / 8  |
|                          |     | (c) Consider use of a flow diagram                                                                                                                                                                           | N / A   |
| Descriptive data         | 14* | (a) Give characteristics of study participants (eg demographic, clinical, social) and information on exposures and potential confounders                                                                     | 12 / 7  |
|                          |     | (b) Indicate number of participants with missing data for each variable of interest                                                                                                                          | Table 1 |
|                          |     | (c) <i>Cohort study</i> —Summarise follow-up time (eg, average and total amount)                                                                                                                             |         |
| Outcome data             | 15* | <i>Cohort study</i> —Report numbers of outcome events or summary measures over time                                                                                                                          |         |
|                          |     | <i>Case-control study</i> —Report numbers in each exposure category, or summary measures of exposure                                                                                                         |         |
|                          |     | <i>Cross-sectional study</i> —Report numbers of outcome events or summary measures                                                                                                                           | 12 / 2  |
| Main results             | 16  | (a) Give unadjusted estimates and, if applicable, confounder-adjusted estimates and their precision (eg, 95% confidence interval). Make clear which confounders were adjusted for and why they were included | 12 / 13 |
|                          |     | (b) Report category boundaries when continuous variables were categorized                                                                                                                                    | 12 / 13 |
|                          |     | (c) If relevant, consider translating estimates of relative risk into absolute risk for a meaningful time period                                                                                             | N / A   |
| Other analyses           | 17  | Report other analyses done—eg analyses of subgroups and interactions, and sensitivity analyses                                                                                                               | 13 / 14 |
| <b>Discussion</b>        |     |                                                                                                                                                                                                              |         |
| Key results              | 18  | Summarise key results with reference to study objectives                                                                                                                                                     | 15 / 18 |
| Limitations              | 19  | Discuss limitations of the study, taking into account sources of potential bias or imprecision. Discuss both direction and magnitude of any potential bias                                                   | 19 / 3  |
| Interpretation           | 20  | Give a cautious overall interpretation of results considering objectives, limitations, multiplicity of analyses, results from similar studies, and other relevant evidence                                   | 19 / 14 |
| Generalisability         | 21  | Discuss the generalisability (external validity) of the study results                                                                                                                                        | 19 / 19 |
| <b>Other information</b> |     |                                                                                                                                                                                                              |         |
| Funding                  | 22  | Give the source of funding and the role of the funders for the present study and, if applicable, for the original study on which the present article is based                                                | 21 / 16 |

\*Give information separately for cases and controls in case-control studies and, if applicable, for exposed and unexposed groups in cohort and cross-sectional studies.

1  
2  
3  
4  
5  
6  
7  
8  
9  
10  
11  
12  
13  
14  
15  
16  
17  
18  
19  
20  
21  
22  
23  
24  
25  
26  
27  
28  
29  
30  
31  
32  
33  
34  
35  
36  
37  
38  
39  
40  
41  
42  
43  
44  
45  
46  
47  
48  
49  
50  
51  
52  
53  
54  
55  
56  
57  
58  
59  
60

**Note:** An Explanation and Elaboration article discusses each checklist item and gives methodological background and published examples of transparent reporting. The STROBE checklist is best used in conjunction with this article (freely available on the Web sites of PLoS Medicine at <http://www.plosmedicine.org/>, Annals of Internal Medicine at <http://www.annals.org/>, and Epidemiology at <http://www.epidem.com/>). Information on the STROBE Initiative is available at [www.strobe-statement.org](http://www.strobe-statement.org).

For peer review only
